# Supplementary material for: Iodine-promoted amide formation via oxidative cleavage of indoles: novel quinazoline-4(3 H )-one and tryptanthrin syntheses
Source: Royal Society of Chemistry journal article supplement (doi:10.1039/d4ra01807a), 2024-01-01

## SUPPORTING INFORMATION

### Iodine - Promoted Amide Formation via Oxidative Cleavage of Indoles: Novel Quinazoline-4(3H)-ones and Tryptanthrins Synthesis

Phong Q. Le,<sup>\*af</sup> Van M. Dinh,<sup>b</sup> Huong D. T. Nguyen,<sup>cf</sup> Hiep Q. Ha,<sup>\*d</sup> Thanh V. Truong<sup>\*ef</sup>

<sup>a</sup>School of Biotechnology, International University-VNU HCM, Quarter 6, Linh Trung Ward, Thu Duc City, Ho Chi Minh City, Vietnam.

<sup>b</sup>Department of Chemistry, Chemical-Biological Centre, Umeå University, SE-90187 Umeå, Sweden.

<sup>c</sup>Faculty of Chemistry, University of Science, 227 Nguyen Van Cu, District 5, Ho Chi Minh City, Vietnam.

<sup>d</sup>Institute of Applied Technology and Sustainable Development, Nguyen Tat Thanh University, Ho Chi Minh City 755414, Vietnam

<sup>e</sup>Faculty of Chemical Engineering, Ho Chi Minh City University of Technology, 268 Ly Thuong Kiet, District 10, Ho Chi Minh City, Vietnam.

<sup>f</sup>Vietnam National University Ho Chi Minh City, Linh Trung Ward, Thu Duc City, Ho Chi Minh City, Vietnam.

\*Email: [lqphong@hcmiu.edu.vn](mailto:lqphong@hcmiu.edu.vn) (Phong Q. Le), [hiepquangha@gmail.com](mailto:hiepquangha@gmail.com) (Hiep Q. Ha), [truongvuthanh@gmail.com](mailto:truongvuthanh@gmail.com) (Thanh V. Truong).

### Table of Contents

|                                                |     |
|------------------------------------------------|-----|
| Section S1. <i>General Information</i>         | S1  |
| Section S2. <i>Reaction Conditions</i>         | S3  |
| Section S3. <i>Mechanistic studies</i>         | S7  |
| Section S4. <i>Structural data of Products</i> | S12 |

### Section S1. *General Information*

**Chemicals used in this work:** All starting reagents, materials and solvents were obtained commercially from Sigma-Aldrich, Acros, Fisher and were used as received without any further purification unless otherwise noted.

### **Analytical techniques:**

*Gas chromatographic (GC)* analyses were performed using a Shimadzu GC 2010-Plus equipped with a flame ionization detector (FID) and a SPB-5 column (length = 30 m, inner diameter = 0.25 mm, and film thickness = 0.25  $\mu$ m). The temperature program for GC analysis heated samples at 100 °C and held for 1 min, then heated them from 100 °C to 280 °C at 40 °C/min. Finally, the samples were heated up to 280 °C and were hold for 4.5 min. Diphenyl ether was used as an internal standard to calculate reaction yields.

*GC-MS analyses* were analyzed on a Shimadzu GCMS-QP2010Ultra with a ZB-5MS column (length = 30 m, inner diameter = 0.25 mm, and film thickness = 0.25  $\mu$ m). The temperature program for GC-MS analysis held samples at 100 °C for 2 min; heated samples from 100 to 280 °C at 4.5 °C/min and held them at 280 °C for 10 min. Inlet temperature was set constant at 280 °C. MS spectra were compared with the spectra gathered in the NIST library.

*Analytical thin layer chromatography (TLC)* was purchased from Merck KGaA (silica gel 60 F254). Visualization of the chromatogram was performed by UV light (254 nm or 365 nm) or Dragendorff's stain.

*Column chromatography* was carried out using silica gel (230 - 400 mesh) purchased from Himedia, India.

*<sup>1</sup>H and <sup>13</sup>C-NMR spectra* were recorded on a Bruker AV 500 MHz spectrometer operating at 500 MHz for <sup>1</sup>H and 125 MHz for <sup>13</sup>C respectively. NMR chemical shifts ( $\delta$ ) were reported in ppm relative to tetramethylsilane (TMS) with the residual solvent as internal reference. Data was reported as follows: chemical shift, multiplicity (*s* = singlet, *d* = doublet, *t* = triplet, *q* = quartet, *m* = multiplet), coupling constants (Hz) and integration.

*Single crystals suitable for X-ray analysis* were obtained by re-crystallization from methanol. The single crystal data for a colorless plate-shaped crystal (0.25  $\times$  0.25  $\times$  0.012 mm<sup>3</sup>) was collected on a Bruker D8 QUEST diffractometer at 100 K with Mo K $\alpha$  radiation ( $\lambda$  = 0.71076 Å) using a TRIUMP monochromator, operated at 50 kV and 30.0 mA. The raw data was processed with the Bruker APEX3 software package<sup>1</sup> and then integrated with the Bruker SAINT package<sup>2</sup> using a

narrow-frame algorithm – corrected for absorption using the SADABS procedure.<sup>3</sup> The structures were solved by intrinsic phasing methods. The refinement was performed by full-matrix least squares on F<sup>2</sup> (SHELXL-2014)<sup>4</sup> using the Olex2 software package.<sup>5</sup>

*Electron paramagnetic resonance (EPR) measurements* were performed on a Bruker EMX-Micro-EPR spectrometer, with a continuous wave X-band. EPR spectra were recorded at room temperature. Typical spectrometer parameters are scan range, 150 G; field set, 3360 G; time constant, 0.03s; scan time, 60s; modulation amplitude 2.0 G; modulation frequency 100 kHz; and microwave power, 0.998 mW. Platforms MatLab (R2018b) and EPR simulator (Isotropic EPR spectra X-band, 9.5 GHz) were employed for simulations.

#### References

- (1) Bruker. *APEX3* v2015.5-2. (Bruker AXS Inc., Madison, Wisconsin, U.S.A. 2015).
- (2) Bruker. *SAINT* v8.37A. (Bruker AXS Inc., Madison, Wisconsin, U.S.A. 2015).
- (3) Bruker. *SADABS* -2016/2. (Bruker AXS Inc., Madison, Wisconsin, U.S.A. 2016).
- (4) Sheldrick, G. A Short History of Shelx. *Acta Cryst.* 2008, **A64**, 112-122.
- (5) Dolomanov, O.V., Bourhis, L.J., Gildea, R.J., Howard, J.A.K. & Puschmann, H. Olex2: A Complete Structure Solution, Refinement and Analysis Program. *J. Appl. Cryst.* 2009, **42**, 339- 341.

---

## Section S2. *Reaction Conditions*

### Procedure for synthesis of 2-phenylquinazolin-4(3H)-one

In a typical procedure, 2-phenylindole (28.8 mg, 0.15 mmol), K<sub>2</sub>CO<sub>3</sub> (41.5 mg, 0.3 mmol) and ammonium hydrocarbonate (17.8 mg, 0.225 mmol) as nitrogen donor were put in an orderly fashion into an 8 mL screw-capped vial, which was subsequently filled with ethyl acetate (2 mL) before adding iodine (45.7 mg, 0.18 mmol). The vial was then purged with oxygen (1 atm) before capping and was vigorously stirred on a magnetic hot plate at 80 °C in 4 hours. After cooling down to room temperature, diphenyl ether (27 µL, 0.15 mmol) was added as internal standard for GC yield determination. About one milliliter of DMSO could also be added to this vial to dissolve the components completely, and the resulting aliquot was subsequently extracted with 3 mL of ethyl acetate and 1 mL of distilled water. After withdrawing the organic phase and dried over anhydrous Na<sub>2</sub>SO<sub>4</sub>, the product formation was monitored by gas chromatography (GC) and the GC yield was calculated based on the calibration curve.

This procedure was also applied for synthesis of 2,3-disubstituted quinazolinones derived from anilines as other nitrogen sources, however, with the addition of H<sub>2</sub>O<sub>2</sub> (65  $\mu$ L, 0.6 mmol) right after iodine being added.

For the isolation of the typical product, namely 2-phenylquinazolin-4(3*H*)-one, resulting solution was quenched with 10 mL of Na<sub>2</sub>S<sub>2</sub>O<sub>3</sub> solution (20% in water), extracted with ethyl acetate (15 mL), dried over anhydrous Na<sub>2</sub>SO<sub>4</sub> prior to the removal of solvent under vacuum. The crude product was purified by silica gel column chromatography (using *n*-hexane: ethyl acetate = 7: 3 as eluent) or by recrystallizing in methanol prior to washing obtained crystals two times with cold ethyl acetate. <sup>1</sup>H and <sup>13</sup>C-NMR analyses were used to confirm the product structure.

### Procedure for synthesis of tryptanthrin and analogues

Tryptanthrin and its structural analogues were synthesized by using indole derivatives as a starting material, which was carried out under an oxygen atmosphere in presence of K<sub>2</sub>CO<sub>3</sub>, TBHP<sub>aq</sub>, I<sub>2</sub>, and CH<sub>3</sub>CN as solvent for the reaction.

**Table S1.** Optimization of reaction conditions for synthesis of tryptanthrin derivatives<sup>a</sup>

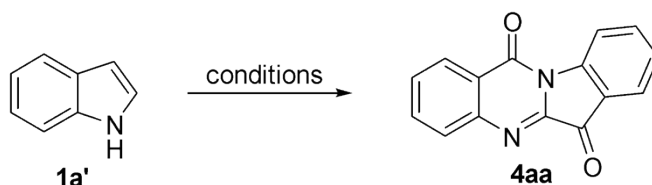

| entry          | catalyst                      | additive    | base                               | solvent                 | yield <sup>b</sup> (%) |
|----------------|-------------------------------|-------------|------------------------------------|-------------------------|------------------------|
| 1              | oxone                         | —           | K <sub>2</sub> CO <sub>3</sub>     | DMSO                    | —                      |
| 2              | I <sub>2</sub> O <sub>5</sub> | —           | K <sub>2</sub> CO <sub>3</sub>     | DMSO                    | —                      |
| 3              | KI                            | TBHP        | K <sub>2</sub> CO <sub>3</sub>     | DMSO                    | 20                     |
| 4              | I <sub>2</sub>                | TBHP        | K <sub>2</sub> CO <sub>3</sub>     | DMSO                    | 50                     |
| 5              | I <sub>2</sub>                | TBHP        | K <sub>2</sub> CO <sub>3</sub>     | DMF                     | 12                     |
| 6              | I <sub>2</sub>                | TBHP        | K <sub>2</sub> CO <sub>3</sub>     | toluene                 | 39                     |
| <b>7</b>       | <b>I<sub>2</sub></b>          | <b>TBHP</b> | <b>K<sub>2</sub>CO<sub>3</sub></b> | <b>CH<sub>3</sub>CN</b> | <b>86</b>              |
| 8 <sup>c</sup> | I <sub>2</sub>                | TBHP        | K <sub>2</sub> CO <sub>3</sub>     | CH <sub>3</sub> CN      | 80                     |
| 9              | I <sub>2</sub>                | TBHP        | Cs <sub>2</sub> CO <sub>3</sub>    | CH <sub>3</sub> CN      | 65                     |



|                 |                |                               |                                |                    |    |
|-----------------|----------------|-------------------------------|--------------------------------|--------------------|----|
| 10              | I <sub>2</sub> | TBHP                          | KOAc                           | CH <sub>3</sub> CN | 72 |
| 11              | I <sub>2</sub> | H <sub>2</sub> O <sub>2</sub> | K <sub>2</sub> CO <sub>3</sub> | CH <sub>3</sub> CN | 46 |
| 12              | I <sub>2</sub> | DTBP                          | K <sub>2</sub> CO <sub>3</sub> | CH <sub>3</sub> CN | 24 |
| 13 <sup>d</sup> | I <sub>2</sub> | TBHP                          | K <sub>2</sub> CO <sub>3</sub> | CH <sub>3</sub> CN | 41 |
| 14 <sup>e</sup> | I <sub>2</sub> | TBHP                          | K <sub>2</sub> CO <sub>3</sub> | CH <sub>3</sub> CN | 23 |
| 15 <sup>f</sup> | I <sub>2</sub> | TBHP                          | K <sub>2</sub> CO <sub>3</sub> | CH <sub>3</sub> CN | 85 |

<sup>a</sup>Reaction condition: **1a'** (0.25 mmol), catalyst (50 mol %), additive (3 equiv), base (2 equiv) in solvent (3 mL) for 2 h under O<sub>2</sub> atmosphere. <sup>b</sup>All yields were isolated yield. <sup>c</sup>The reaction was run at 100°C. <sup>d</sup>Under air. <sup>e</sup>The reaction was tested in N<sub>2</sub> atmosphere. <sup>f</sup>Used 1.2 equiv. of I<sub>2</sub>.

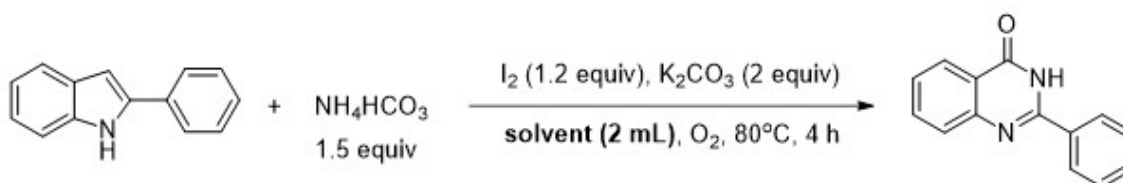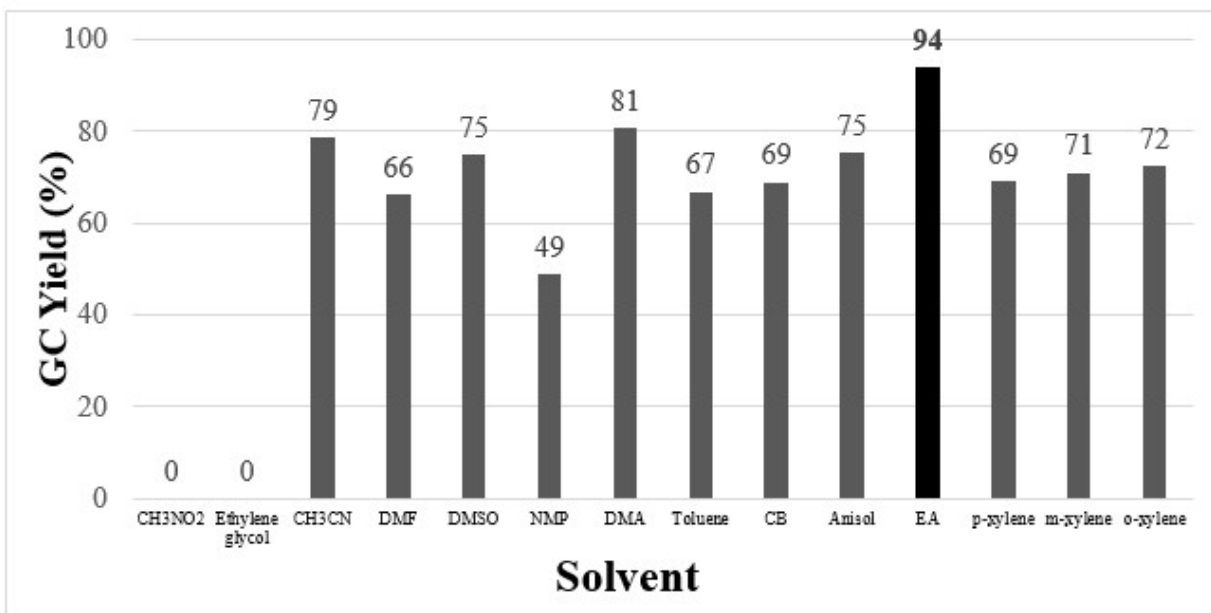

**Scheme S1.** Column chart illustrating effect of solvent on the reaction

In a typical experiment, a mixture of indole (0.25 mmol, 29.28 mg) and potassium carbonate (2 equiv., 69 mg) were added to a 8 mL pressurized vial. The oxidation reagent TBHP<sub>aq</sub> (166 µl) was then introduced to the mixture, followed by addition of CH<sub>3</sub>CN (3 mL) as reaction solvent. Next, iodine (50 mol %, 31.7 mg) was carefully put into the vial. Finally, the vial was filled completely

with O<sub>2</sub> atmosphere and the reaction mixture was magnetically stirred at 80°C for 2 h. Samples were withdrawn after the reaction and quenched with water under room temperature. Ethyl acetate with 10% Na<sub>2</sub>S<sub>2</sub>O<sub>3</sub> was used to extract organic components, and the obtained solution was dried utilizing anhydrous Na<sub>2</sub>SO<sub>4</sub>. The product yield was determined by GC analysis. Tryptanthrin was isolated on silicagel by column chromatography using solvent system hexane-ethyl acetate 7:3 (v:v) and was authenticated by <sup>1</sup>H NMR, <sup>13</sup>C NMR and GC-MS.

## Section S3. Mechanistic studies

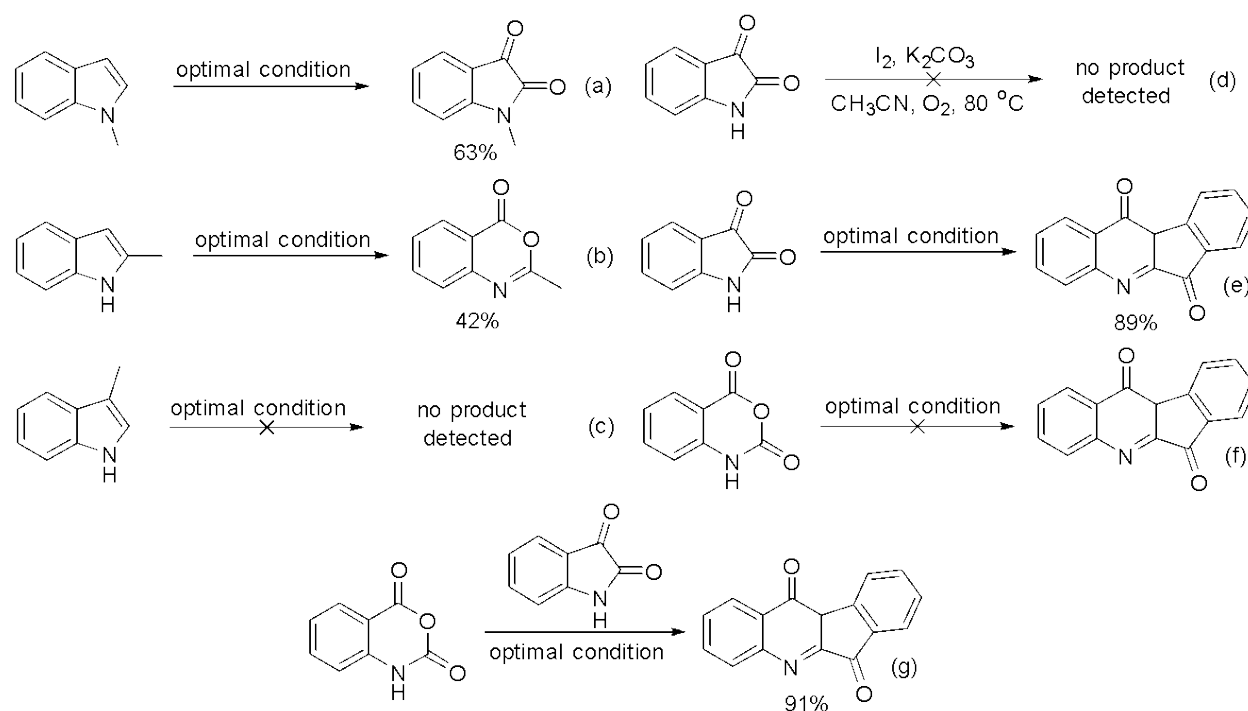

**Scheme S2. Different control experiments on synthesis of tryptanthrins**

## Electron paramagnetic resonance (EPR) measurements

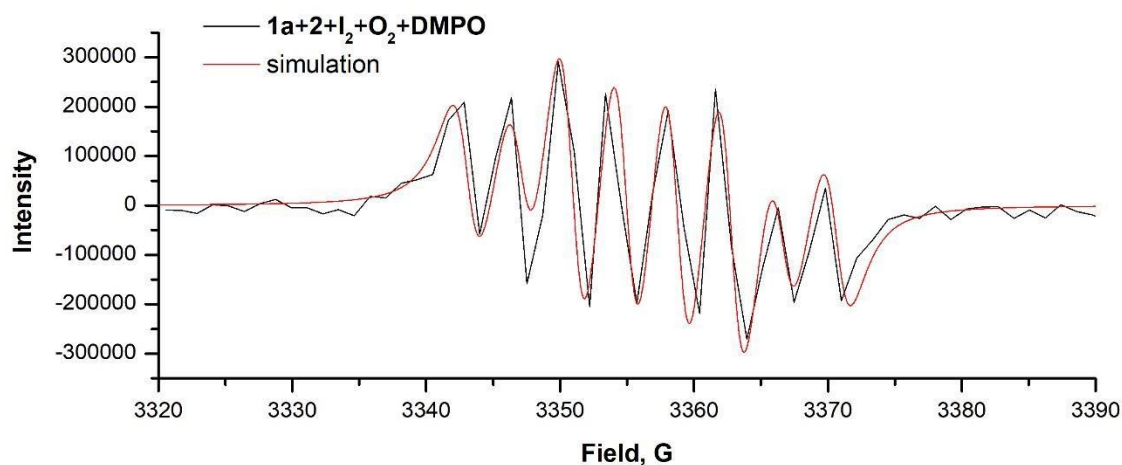

**Figure S1. 1a and 2 under standard reaction condition**

2-phenylindole **1a** (28.8 mg, 0.15 mmol),  $NH_4HCO_3$  (**2**, 17.8 mg, 1.5 eq.) and  $K_2CO_3$  (41.5 mg, 0.3 mmol) were added into a vial, followed by introduction of ethyl acetate (2 mL) and iodine

(45.7 mg, 0.18 mmol). The mixture was then stirred at 80 °C under oxygen atmosphere in 15 minutes. Next, to 70 uL of the obtained reaction solution was added 70 uL of 200 mM DMPO solution in dimethyl sulfoxide and EPR measurements were performed finally.

Parameters observed for the spin adduct are  $g = 2.0220$ ,  $a_{N1} = a_{H1} = 7.85$  G, and  $a_{H2} = 4.00$  G.

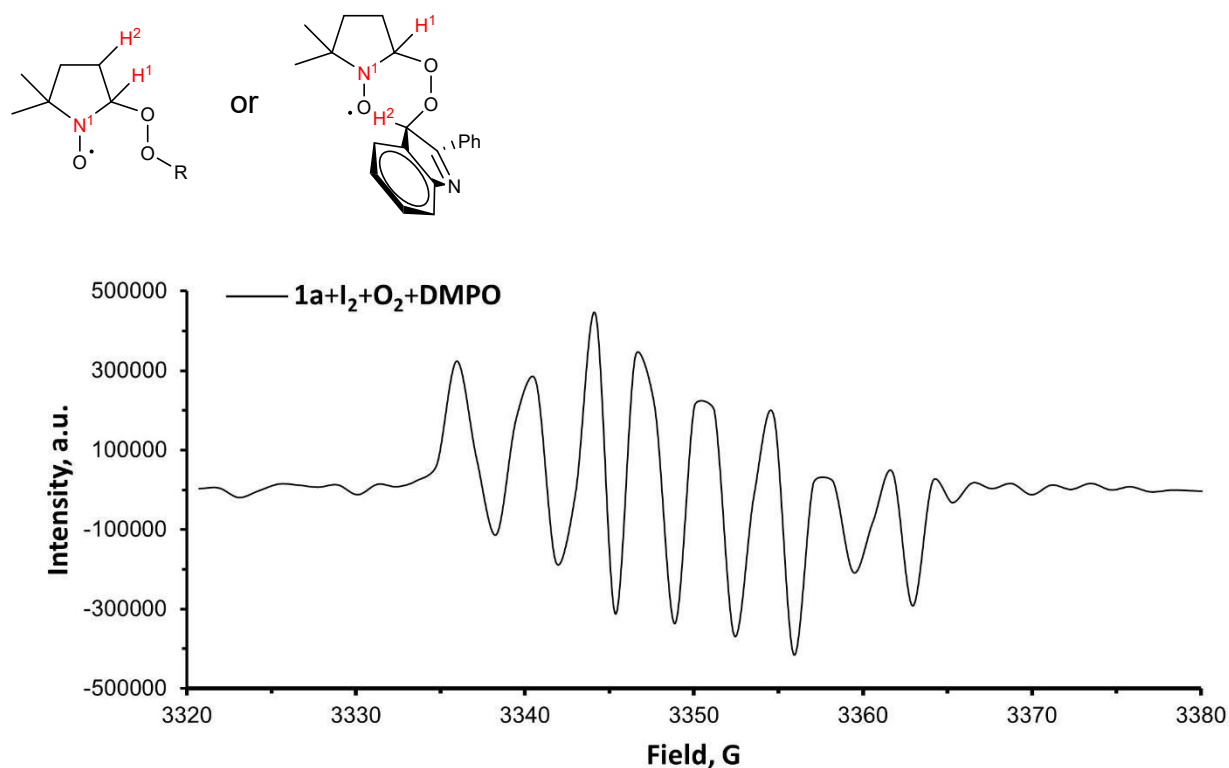

**Figure S2. 1a in O<sub>2</sub> atmosphere**

2-phenylindole **1a** (28.8 mg, 0.15 mmol) and K<sub>2</sub>CO<sub>3</sub> (41.5 mg, 0.3 mmol) were added into a vial, followed by introduction of ethyl acetate (2 mL) and iodine (45.7 mg, 0.18 mmol). The mixture was then stirred at 80 °C under oxygen atmosphere in 15 minutes. Next, to 70 uL of the obtained reaction solution was added 70 uL of 200 mM DMPO solution in dimethyl sulfoxide and EPR measurements were performed finally.

Parameters observed for the spin adduct are  $g = 2.0220$ ,  $a_{N1} = a_{H1} = 7.85$  G, and  $a_{H2} = 4.00$  G.

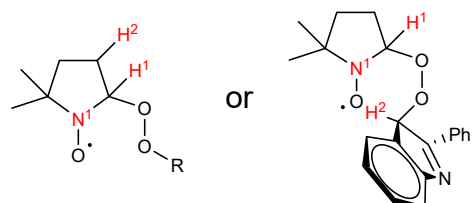

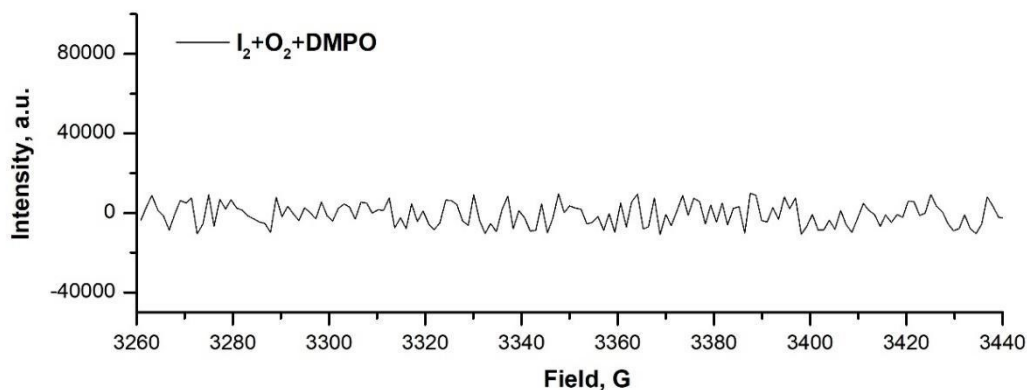

**Figure S3.  $I_2 + O_2$  without 1a and 2**

$K_2CO_3$  (41.5 mg, 0.3 mmol) and iodine (45.7 mg, 0.18 mmol) were added into a vial, followed by introduction of ethyl acetate (2 mL). The mixture was then stirred at 80 °C under oxygen atmosphere in 15 minutes. Next, to 70  $\mu$ L of the obtained reaction solution was added 70  $\mu$ L of 200 mM DMPO solution in dimethyl sulfoxide and EPR measurements were performed finally.

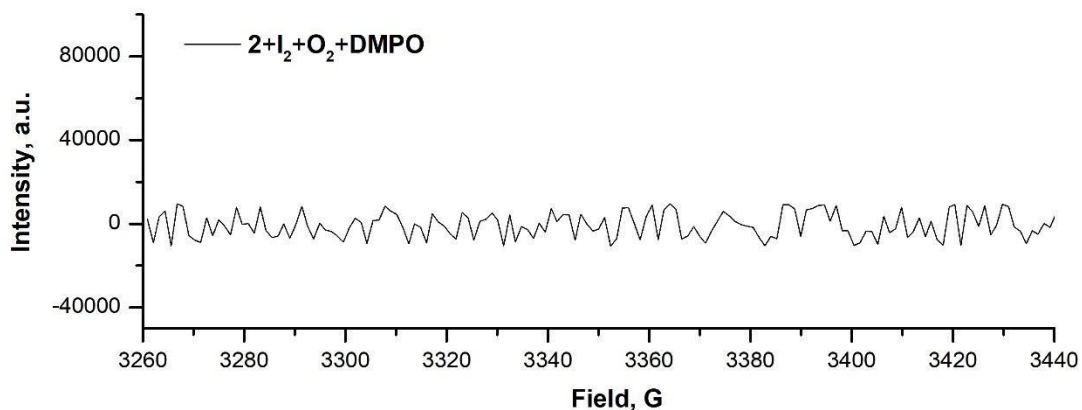

**Figure S4. 2 in presence of iodine**

$NH_4HCO_3$  (**2**, 17.8 mg, 1.5 eq.) and  $K_2CO_3$  (41.5 mg, 0.3 mmol) were added into a vial, followed by introduction of ethyl acetate (2 mL). The mixture was then stirred at 80 °C under oxygen atmosphere in 15 minutes. Next, to 70  $\mu$ L of the obtained reaction solution was added 70  $\mu$ L of 200 mM DMPO solution in dimethyl sulfoxide and EPR measurements were performed finally.

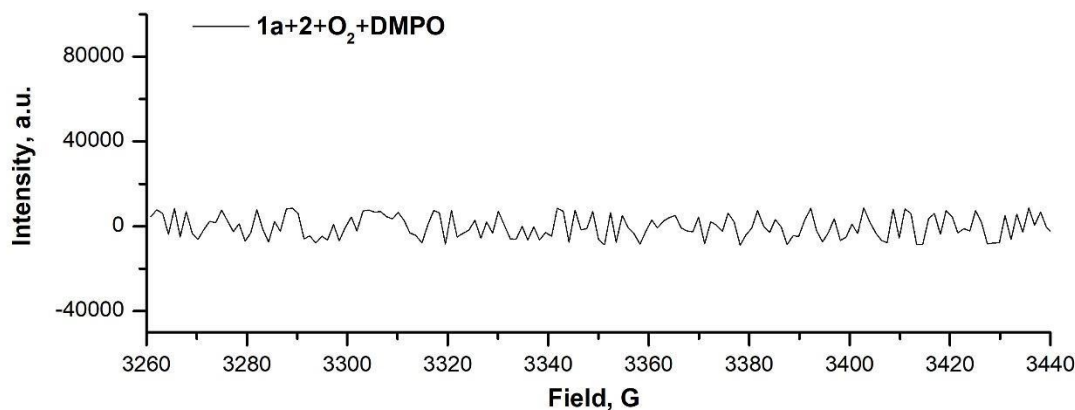

**Figure S5. 1a and 2 in absence of iodine**

2-phenylindole **1a** (28.8 mg, 0.15 mmol),  $\text{NH}_4\text{HCO}_3$  (**2**, 17.8 mg, 1.5 eq.) and  $\text{K}_2\text{CO}_3$  (41.5 mg, 0.3 mmol) were added into a vial, followed by introduction of ethyl acetate (2 mL). The mixture was then stirred at 80 °C under oxygen atmosphere in 15 minutes. Next, to 70 uL of the obtained reaction solution was added 70 uL of 200 mM DMPO solution in dimethyl sulfoxide and EPR measurements were performed finally.

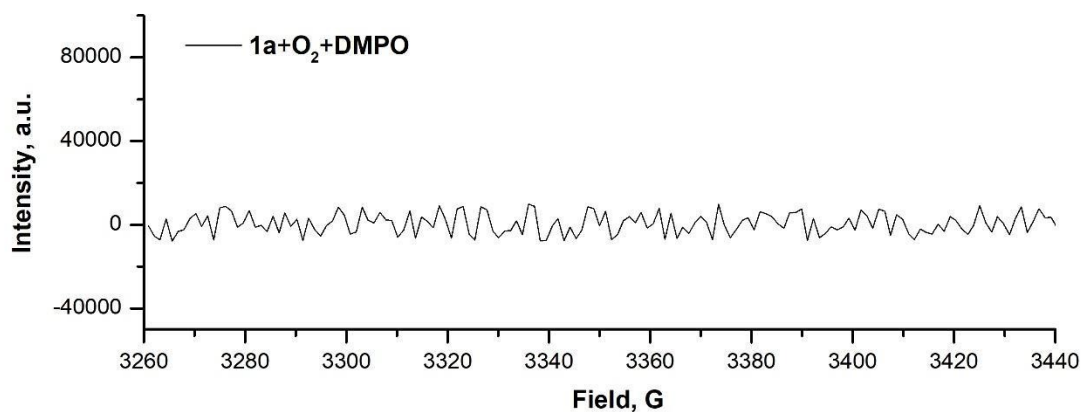

**Figure S6. 1a in oxygen atmosphere without iodine**

2-phenylindole **1a** (28.8 mg, 0.15 mmol) and  $\text{K}_2\text{CO}_3$  (41.5 mg, 0.3 mmol) were added into a vial, followed by introduction of ethyl acetate (2 mL). The mixture was then stirred at 80 °C under oxygen atmosphere in 15 minutes. Next, to 70 uL of the obtained reaction solution was added 70 uL of 200 mM DMPO solution in dimethyl sulfoxide and EPR measurements were performed finally.

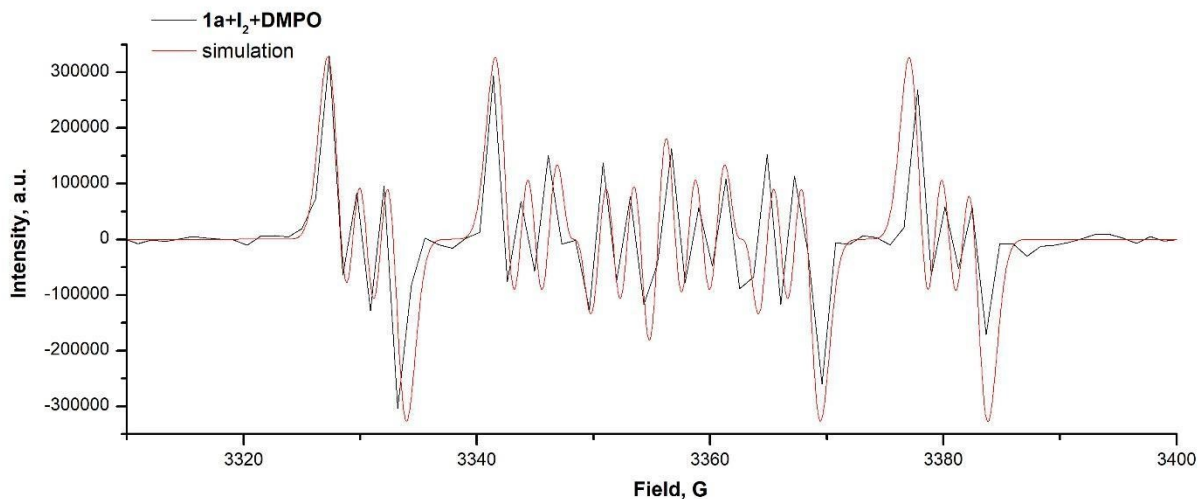

**Figure S7. 1a in inert gas atmosphere (N<sub>2</sub> or Ar)**

2-phenylindole **1a** (28.8 mg, 0.15 mmol) and K<sub>2</sub>CO<sub>3</sub> (41.5 mg, 0.3 mmol) were added into a vial, followed by introduction of ethyl acetate (2 mL) and iodine (45.7 mg, 0.18 mmol). The mixture was then stirred at 80 °C under an inert gas atmosphere in 15 minutes. Next, to 70 uL of the obtained reaction solution was added 70 uL of 200 mM DMPO solution in dimethyl sulfoxide and EPR measurements were performed finally.

Parameters observed for the spin adduct are  $g = 2.0228$ ,  $\alpha_{N1} = 14.38$  G,  $\alpha_{N2} = 2.40$  G, and  $\alpha_H = 21.12$  G.

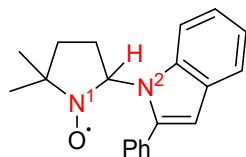

#### References

- (1) Manual, M. A. T. L. A. B. Version 9.5. 0.944444 (R2018b), 2018. *Natick, Massachusetts: The MathWorks Inc.*
- (2) <http://www.eprsimulator.org/isotropic.html>, 03-Nov-2020.
- (3) H. Wang, Y. Li, Q. Lu, M. Yu, X. Bai, S. Wang, H. Cong, H. Zhang and A. Lei, *ACS Catal.*, 2019, **9**, 1888-1894.
- (4) H. Huang, J. Cai, X. Ji, F. Xiao, Y. Chen and G. J. Deng, *Angewandte Chemie*, 2016, **128**, 315-319.
- (5) C.-J. Wu, J.-J. Zhong, Q.-Y. Meng, T. Lei, X.-W. Gao, C.-H. Tung and L.-Z. Wu, *Org. Lett.*, 2015, **17**, 884-887.
- (6) K. M. Nash, A. Rockenbauer and F. A. Villamena, *Chem. Res. Toxicol.*, 2012, **25**, 1581-1597.
- (7) Wu, H. (1997). Organic and Drug Molecules Spin Traps and Free Radicals Multi-frequency EPR Spectra Simulation by Fast Fourier Transform (FFT). *Electron spin resonance*, 1, 2.

---

## Section S4. Structural data of Products

### 2-Phenylquinazolin-4(3H)-one (3aa)

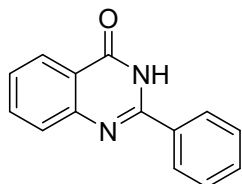

$^1\text{H}$  NMR ( $\text{CDCl}_3$ , 500 MHz, ppm):  $\delta_H$  11.22 (br, 1H), 8.34 (dd,  $J = 8.0, 1.0$  Hz, 1H), 8.23-8.21 (m, 2H), 7.85- 7.80 (m, 2H), 7.61- 7.59 (m, 3H), 7.53- 7.50 (m, 1H).

$^{13}\text{C}$  NMR ( $\text{CDCl}_3$ , 125 MHz, ppm):  $\delta_C$  163.7 (C), 151.8 (C), 149.6 (C), 135.1 (CH), 133.0 (C), 131.8 (CH), 129.3 (2 x CH), 128.2 (CH), 127.4 (2 x CH), 127.0 (CH), 126.6 (CH), 121.1 (C).

### 2-(2-Methylphenyl)quinazolin-4(3H)-one (3ba)

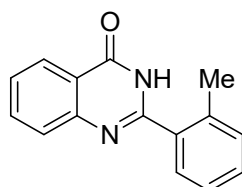

$^1\text{H}$  NMR ( $\text{CDCl}_3$ , 500 MHz, ppm):  $\delta_H$  12.44 (s, 1H), 8.17 (d,  $J = 8.0$  Hz, 1H), 7.84 (t,  $J = 7.5$  Hz, 1H), 7.69 (d,  $J = 8.0$  Hz, 1H), 7.56- 7.50 (m, 2H), 7.43 (t,  $J = 7.5$ , 1H), 7.36- 7.31 (m, 2H), 2.38 (s, 3H).

$^{13}\text{C}$  NMR ( $\text{CDCl}_3$ , 125 MHz, ppm):  $\delta_C$  161.8 (C), 154.4 (C), 148.7 (C), 136.1 (C), 134.4 (CH), 134.2 (C), 130.5 (CH), 129.9 (CH), 129.1 (CH), 127.4 (CH), 126.6 (CH), 125.8 (CH), 125.7 (CH), 121.0 (C), 19.5 ( $\text{CH}_3$ ).

### 2-(3-Methylphenyl)quinazolin-4(3H)-one (3ca)

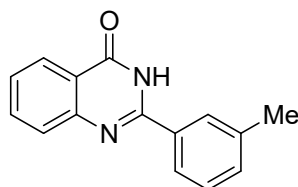

$^1\text{H}$  NMR ( $\text{CDCl}_3$ , 500 MHz, ppm):  $\delta_H$  12.47 (s, 1H), 8.15 (d,  $J = 7.5$  Hz, 1H), 8.03 (s, 1H), 7.97 (d,  $J = 7.5$  Hz, 1H), 7.84 (t,  $J = 8.0$  Hz, 1H), 7.74 (d,  $J = 8.0$  Hz, 1H), 7.52 (t,  $J = 7.5$ , 1H), 7.45- 7.40 (m, 2H), 2.41 (s, 3H).

$^{13}\text{C}$  NMR ( $\text{CDCl}_3$ , 125 MHz, ppm):  $\delta_C$  162.2 (C), 152.4 (C), 148.8 (C), 137.9 (C), 134.6 (CH), 132.6 (C), 132.0 (CH), 128.5 (CH), 128.3 (CH), 127.5 (CH), 126.5 (C), 125.8 (CH), 124.9 (CH), 121.0 (C), 20.9 ( $\text{CH}_3$ ).

### 2-(3-Methoxyphenyl)quinazolin-4(3H)-one (3da)

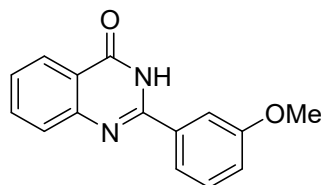



$^1\text{H}$  NMR ( $\text{CDCl}_3$ , 500 MHz, ppm):  $\delta_H$  12.54 (s, 1H), 8.16 (dd,  $J = 8.0, 1.0$  Hz, 2H), 7.86- 7.83 (m, 1H ), 7.79 (d,  $J = 8.0$  Hz, 1H ), 7.75 (dd,  $J = 5.0, 2.5$  Hz, 2H), 7.54- 7.51 (m, 1H), 7.46 (t,  $J = 8.0$  Hz, 1H), 7.15 (dd,  $J = 8.0, 2.0$  Hz, 1H) 3.87 (s, 3H).

$^{13}\text{C}$  NMR ( $\text{CDCl}_3$ , 125 MHz, ppm):  $\delta_C$  162.2 (C), 159.3 (C), 152.0 (C), 148.7 (C), 134.6 (CH), 134.0 (C), 129.7 (CH), 127.5 (CH), 126.6 (CH), 125.8 (CH), 121.0 (C), 120.1 (CH), 117.6 (CH), 112.5 (CH), 55.4 ( $\text{CH}_3$ ).

### 2-(4-Methoxyphenyl)quinazolin-4(3H)-one (3ea)

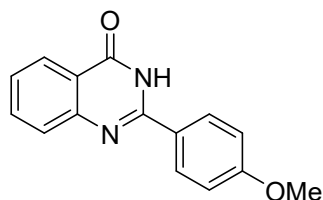

$^1\text{H}$  NMR ( $\text{CDCl}_3$ , 500 MHz, ppm):  $\delta_H$  12.41 (s, 1H), 8.19 (d,  $J = 9.0$  Hz, 2H), 8.13 (dd,  $J = 8.0, 1.0$  Hz, 1H ), 7.82- 7.80 (m, 1H), 7.70 (d,  $J = 8.0$  Hz, 1H ), 7.48 (t,  $J = 7.5$  Hz, 1H), 7.09 (d,  $J = 9.0$  Hz, 2H), 3.85 (s, 3H).

$^{13}\text{C}$  NMR ( $\text{CDCl}_3$ , 125 MHz, ppm):  $\delta_C$  162.3 (C), 161.9 (C), 151.9 (C), 148.9 (C), 135.5 (CH), 129.4 (2 x CH), 127.3 (CH), 126.1 (CH), 125.8 (CH), 124.8 (CH), 120.7 (CH), 114.0 (2 x CH), 55.4 ( $\text{CH}_3$ ).

### 2-(2-Chlorophenyl)quinazolin-4(3H)-one (3fa)

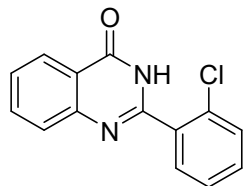

$^1\text{H}$  NMR ( $\text{CDCl}_3$ , 500 MHz, ppm):  $\delta_H$  12.64 (s, 1H), 8.18 (dd,  $J = 8.0, 1.0$  Hz, 1H), 7.89- 7.83 (m, 1H ), 7.71 (d,  $J = 8.0$  Hz, 1H), 7.67 (dd,  $J = 7.5, 1.5$  Hz, 1H), 7.62 (d,  $J = 8.0$  Hz, 1H), 7.58- 7.55 (m, 2H), 7.50 (td,  $J = 7.5, 1.0$  Hz, 1H).

$^{13}\text{C}$  NMR ( $\text{CDCl}_3$ , 125 MHz, ppm):  $\delta_C$  161.4 (C), 152.2 (CH), 148.6 (C), 134.6 (C), 133.8 (C), 131.6 (CH), 131.5 (C), 130.9 (CH), 129.6 (CH), 127.5 (CH), 127.2 (CH), 127.0 (CH), 125.8 (CH), 121.3 (C).

**2-(3-Chlorophenyl)quinazolin-4(3H)-one (3ga)**

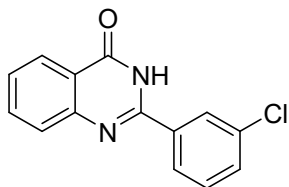

$^1\text{H}$  NMR ( $\text{CDCl}_3$ , 500 MHz, ppm):  $\delta_H$  12.63 (s, 1H), 8.25 (t,  $J = 1.5$  Hz, 1H), 8.17- 8.15 (m, 2H), 7.88- 7.84 (m, 1H), 7.77 (d,  $J = 8.0$  Hz, 1H), 7.67 (dd,  $J = 8.0, 1.0$  Hz, 1H), 7.59 (t,  $J = 8.0$  Hz, 1H), 7.56- 7.53 (m, 1H).

$^{13}\text{C}$  NMR ( $\text{CDCl}_3$ , 125 MHz, ppm):  $\delta_C$  162.1 (C), 152.5 (C), 148.5 (C), 134.7 (C), 134.6 (CH), 133.4 (CH), 131.1 (CH), 130.5 (CH), 127.6 (C), 127.5 (CH), 126.9 (CH), 126.4 (CH), 125.9 (CH), 121.1 (C).

**2-(4-Chlorophenyl)quinazolin-4(3H)-one (3ha)**

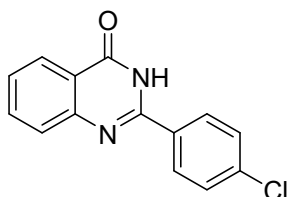

$^1\text{H}$  NMR ( $\text{CDCl}_3$ , 500 MHz, ppm):  $\delta_H$  12.61 (s, 1H), 8.20 (d,  $J = 8.5$  Hz, 2H), 8.15 (dd,  $J = 8.0, 1.0$  Hz, 1H), 7.85 (dd,  $J = 7.0, 1.5$  Hz, 1H), 7.75 (d,  $J = 8.0$  Hz, 1H), 7.63 (d,  $J = 8.5$  Hz, 2H), 7.54 (dd,  $J = 7.0, 1.0$  Hz, 1H).

$^{13}\text{C}$  NMR ( $\text{CDCl}_3$ , 125 MHz, ppm):  $\delta_C$  162.1 (C), 151.3 (C), 148.6 (C), 136.3 (C), 134.7 (CH), 131.5 (C), 129.6 (2 x CH), 128.7 (2 x CH), 127.5 (CH), 126.8 (CH), 125.9 (CH), 121.0 (C).

**2-(2-Hydroxyphenyl)quinazolin-4(3H)-one (3ia)**

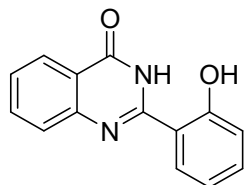

$^1\text{H}$  NMR ( $\text{CDCl}_3$ , 500 MHz, ppm):  $\delta_H$  13.78 (s, 1H), 12.47 (s, 1H), 8.23 (d,  $J = 8.0$  Hz, 1H), 8.16 (d,  $J = 8.0$  Hz, 1H), 7.87- 7.84 (m, 1H), 7.76 (d,  $J = 8.0$  Hz, 1H), 7.54 (t,  $J = 7.5$ , 1H), 7.45 (t,  $J = 7.5$ , 1H), 7.01 (d,  $J = 8.0$  Hz, 1H), 6.96 (t,  $J = 7.5$  Hz, 1H).

$^{13}\text{C}$  NMR ( $\text{CDCl}_3$ , 125 MHz, ppm):  $\delta_C$  161.4 (C), 160.0 (C), 153.7 (C), 146.1 (C), 135.0 (CH), 133.7 (CH), 127.7 (CH), 126.9 (CH), 126.0 (CH), 120.3 (C), 118.8 (2 x CH), 117.9 (CH), 113.7 (C).

**2-(3-Hydroxyphenyl)quinazolin-4(3H)-one (3ja)**

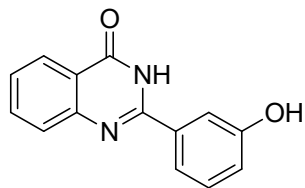

$^1\text{H}$  NMR ( $\text{CDCl}_3$ , 500 MHz, ppm):  $\delta_H$  12.43 (s, 1H), 9.76 (s 1H), 8.15 (d,  $J = 8.0$  Hz, 1H), 7.83 (t,  $J = 7.0$  Hz, 1H), 7.72 (d,  $J = 8.5$  Hz, 1H), 7.60- 7.59 (m, 2H), 7.52 (t,  $J = 7.5$ , 1H), 7.33 (t,  $J = 8.0$  Hz, 1H), 6.98 (d,  $J = 7.5$ , 1H).

$^{13}\text{C}$  NMR ( $\text{CDCl}_3$ , 125 MHz, ppm):  $\delta_C$  162.2 (C), 157.5 (C), 152.3 (C), 148.7 (C), 134.6 (CH), 134.0 (C), 129.6 (CH), 127.5 (CH), 126.5 (CH), 125.8 (CH), 121.0 (C), 118.5 (CH), 118.3 (CH), 114.6 (CH).

**2-(4-Hydroxyphenyl)quinazolin-4(3H)-one (3ka)**

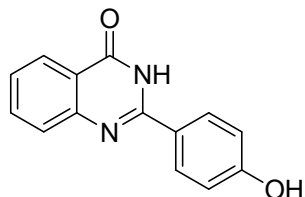

$^1\text{H}$  NMR ( $\text{CDCl}_3$ , 500 MHz, ppm):  $\delta_H$  12.30 (s, 1H), 10.16 (s, 1H), 8.12 (d,  $J = 7.5$  Hz, 1H), 8.08 (d,  $J = 9.0$  Hz, 2H), 7.81- 7.78 (m, 1H), 7.68 (d,  $J = 8.0$  Hz, 1H), 7.46 (t,  $J = 7.5$ , 1H), 6.89 (d,  $J = 7.5$ , 2H).

$^{13}\text{C}$  NMR ( $\text{CDCl}_3$ , 125 MHz, ppm):  $\delta_C$  162.3 (C), 160.5 (C), 152.1 (C), 149.1 (C), 134.5 (CH), 129.6 (2 x CH), 127.2 (CH), 125.9 (CH), 125.8 (CH), 123.2 (C), 120.6 (C), 115.4 (2 x CH).

**2-(2-Nitrophenyl)quinazolin-4(3H)-one (3la)**

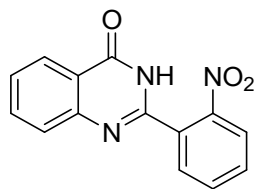

$^1\text{H}$  NMR ( $\text{CDCl}_3$ , 500 MHz, ppm):  $\delta_H$  12.83 (s, 1H), 8.40 (q,  $J = 9.0$  Hz, 4H), 8.18 (d,  $J = 8.0$  Hz, 1H), 7.88 (t,  $J = 8.5$  Hz, 1H), 7.80 (d,  $J = 8.0$  Hz, 1H), 7.58 (t,  $J = 8.0$  Hz, 1H).

$^{13}\text{C}$  NMR ( $\text{CDCl}_3$ , 125 MHz, ppm):  $\delta_C$  162.0 (C), 150.7 (C), 149.0 (C), 148.3 (C), 138.5 (C), 134.8 (CH), 129.3 (2 x CH), 127.8 (CH), 127.4 (CH), 125.9 (CH), 123.6 (2 x CH), 121.3 (C).

**2-(4-Bromophenyl)quinazolin-4(3H)-one (3ma)**

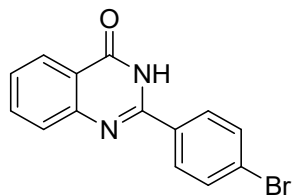

$^1\text{H}$  NMR ( $\text{CDCl}_3$ , 500 MHz, ppm):  $\delta_H$  12.61 (s, 1H), 8.15 (d,  $J$  = 8.0 Hz, 1H), 8.13 (d,  $J$  = 8.5 Hz, 2H), 7.85 (t,  $J$  = 8.0 Hz, 1H), 7.77 (d,  $J$  = 8.5 Hz, 1H), 7.75 (d,  $J$  = 8.5 Hz, 1H), 7.54 (t,  $J$  = 7.5 Hz, 1H).

$^{13}\text{C}$  NMR ( $\text{CDCl}_3$ , 125 MHz, ppm):  $\delta_C$  162.2 (C), 151.4 (C), 134.7 (CH), 131.9 (C), 131.6 (2 x CH), 129.8 (2 x CH), 127.5 (C), 126.8 (C), 125.9 (CH), 125.2 (C), 121.0 (C).

### 2-(3,4-Dimethoxyphenyl)quinazolin-4(3H)-one (3na)

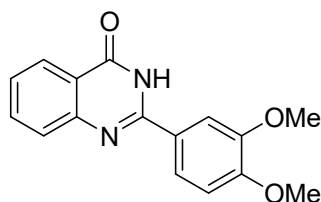

$^1\text{H}$  NMR ( $\text{CDCl}_3$ , 500 MHz, ppm):  $\delta_H$  12.43 (s, 1H), 8.13 (d,  $J$  = 8.0 Hz, 1H), 7.87 (dd,  $J$  = 8.5, 2.0 Hz, 1H), 7.83- 7.80 (m, 2H), 7.71 (d,  $J$  = 8.0 Hz, 1H), 7.49 (t,  $J$  = 7.5 Hz, 1H), 7.12 (d,  $J$  = 8.5, 1H), 3.88 (s, 3H), 3.85 (s, 3H).

$^{13}\text{C}$  NMR ( $\text{CDCl}_3$ , 125 MHz, ppm):  $\delta_C$  162.3 (C), 151.8 (C), 151.6 (C), 148.9 (C), 148.5 (C), 134.6 (CH), 127.3 (CH), 126.1 (CH), 125.8 (CH), 124.7 (C), 121.1 (CH), 120.7 (C), 111.4 (CH), 110.7 (CH), 55.7 (2 x  $\text{CH}_3$ ).

### 6-Chloro-2-phenylquinazolin-4(3H)-one (3oa)

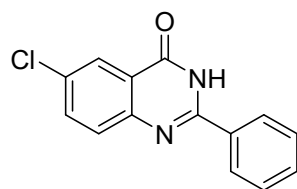

$^1\text{H}$  NMR ( $\text{DMSO}-d_6$ , 500 MHz, ppm):  $\delta_H$  12.72 (br, 1H), 8.18 (d,  $J$  = 8.0 Hz, 2H), 8.10 (d,  $J$  = 1.0 Hz, 1H), 7.89 (dd,  $J$  = 8.0, 1.0 Hz, 1H), 7.77 (d,  $J$  = 8.0 Hz, 1H), 7.63- 7.55 (m, 3H)

$^{13}\text{C}$  NMR ( $\text{DMSO}-d_6$ , 125 MHz, ppm):  $\delta_C$  161.9 (C), 153.6 (C), 147.9 (C), 135.1 (CH), 133.0 (C), 132.1 (CH), 131.2 (CH), 130.2 (C), 129.1 (2xCH), 128.3 (2xCH), 125.3 (CH), 122.7 (C).

### 6-Fluoro-2-phenylquinazolin-4(3H)-one (3pa)

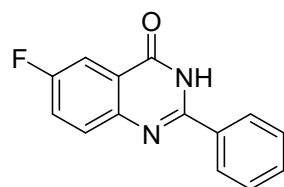

$^1\text{H}$  NMR (DMSO- $d_6$ , 500 MHz, ppm):  $\delta_H$  12.68 (br, 1H), 8.18 (d,  $J$  = 8.0 Hz, 2H), 7.86–7.82 (m, 2H), 7.74 (td,  $J$  = 8.0, 2.5 Hz, 1H), 7.62–7.55 (m, 3H)

$^{13}\text{C}$  NMR (DMSO- $d_6$ , 125 MHz, ppm):  $\delta_C$  162.2 (C), 161.5–159.5 (d, C-F), 152.4 (C), 146.1 (C), 133.1 (CH), 131.9 (CH), 130.8 (C), 129.1 (2xCH), 128.2 (2xCH), 123.6–123.5 (d, C<sub>o</sub>H-C-F), 122.7–122.6 (d, C<sub>m</sub>), 111.1–110.9 (d, C<sub>o</sub>H-C-F).

### 2-(Pyridin-2-yl)quinazolin-4(3H)-one (3qa)

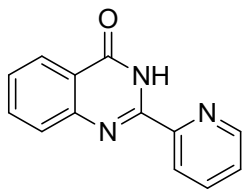

$^1\text{H}$  NMR (CDCl<sub>3</sub>, 500 MHz, ppm):  $\delta_H$  11.84 (s, 1H), 8.77 (d,  $J$  = 4.5 Hz, 1H), 8.47 (d,  $J$  = 8.0 Hz, 1H), 8.20 (d,  $J$  = 8.0 Hz, 1H), 8.08 (td,  $J$  = 8.0, 1.5 Hz, 1H), 7.88 (t,  $J$  = 8.0 Hz, 1H), 7.82 (d,  $J$  = 8.0 Hz, 1H), 7.67 (dd,  $J$  = 7.0, 5.5 Hz, 1H), 7.58 (t,  $J$  = 7.5 Hz, 1H).

$^{13}\text{C}$  NMR (CDCl<sub>3</sub>, 125 MHz, ppm):  $\delta_C$  160.8 (C), 150.0 (C), 149.0 (CH), 148.7 (C), 148.4 (C), 138.0 (CH), 134.7 (CH), 127.7 (CH), 127.3 (CH), 126.6 (CH), 126.1 (CH), 122.2 (CH), 122.0 (C).

### 2-(Pyridin-3-yl)quinazolin-4(3H)-one (3ra)

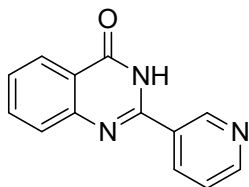

$^1\text{H}$  NMR (CDCl<sub>3</sub>, 500 MHz, ppm):  $\delta_H$  12.74 (s, 1H), 9.30 (d,  $J$  = 1.5 Hz, 1H), 8.76 (d,  $J$  = 3.5 Hz, 1H), 8.51–8.49 (m, 1H), 8.17 (d,  $J$  = 7.5 Hz, 1H), 7.88–7.85 (m, 1H), 7.77 (d,  $J$  = 8.0 Hz, 1H), 7.59 (dd,  $J$  = 8.0, 5.0 Hz, 1H), 7.56 (t,  $J$  = 8.0 Hz, 1H).

$^{13}\text{C}$  NMR (CDCl<sub>3</sub>, 125 MHz, ppm):  $\delta_C$  162.1 (C), 151.8 (CH), 150.8 (C), 148.7 (CH), 148.5 (C), 135.4 (CH), 134.7 (CH), 128.7 (CH), 127.6 (C), 126.9 (CH), 125.9 (C), 123.5 (CH), 121.1 (C).

### 2-(Pyridin-4-yl)quinazolin-4(3H)-one (3sa)

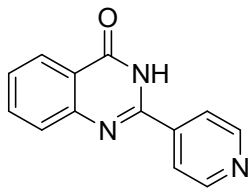

$^1\text{H}$  NMR ( $\text{CDCl}_3$ , 500 MHz, ppm):  $\delta_H$  12.77 (s, 1H), 8.79 (s, 2H), 8.18 (d,  $J = 8.0$  Hz, 1H), 8.12 (d,  $J = 5.0$  Hz, 2H), 7.88 (t,  $J = 8.0$  Hz, 1H), 7.80 (d,  $J = 8.0$  Hz, 1H), 7.59 (t,  $J = 7.5$  Hz, 1H).

$^{13}\text{C}$  NMR ( $\text{CDCl}_3$ , 125 MHz, ppm):  $\delta_C$  162.0 (C), 150.5 (C), 150.3 (CH), 148.3 (C), 139.9 (C), 134.8 (CH), 127.8 (C), 127.4 (CH), 125.9 (C), 121.6 (CH), 121.5 (C).

### 2-(2-Thiophen)quinazolin-4(3H)-one (3ta)

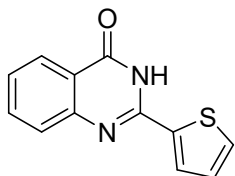

$^1\text{H}$  NMR ( $\text{CDCl}_3$ , 500 MHz, ppm):  $\delta_H$  12.65 (s, 1H), 8.23 (d,  $J = 3.5$  Hz, 1H), 8.12 (d,  $J = 7.5$  Hz, 1H), 7.87 (d,  $J = 9.5$  Hz, 1H), 7.81 (d,  $J = 8.0$  Hz, 1H), 7.65 (d,  $J = 8.5$  Hz, 1H), 7.49 (t,  $J = 7.5$ , 1H), 7.24 (t,  $J = 4.5$ , 1H).

$^{13}\text{C}$  NMR ( $\text{CDCl}_3$ , 125 MHz, ppm):  $\delta_C$  161.8 (C), 148.6 (C), 147.8 (C), 137.4 (C), 134.7 (CH), 132.2 (CH), 129.4 (CH), 128.5 (CH), 126.9 (CH), 126.3 (CH), 126.0 (CH), 121.0 (C).

### 2-(3-Thiophen)quinazolin-4(3H)-one (3ua)

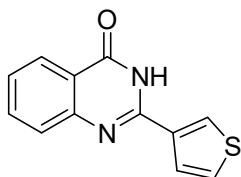

$^1\text{H}$  NMR ( $\text{CDCl}_3$ , 500 MHz, ppm):  $\delta_H$  12.47 (s, 1H), 8.61- 8.60 (m, 1H), 8.13 (d,  $J = 8.0$  Hz, 1H), 7.88 (d,  $J = 5.0$  Hz, 1H), 7.82 (t,  $J = 8.0$  Hz, 1H), 7.72- 7.69 (m, 2H), 7.50 (t,  $J = 7.5$  Hz, 1H).

$^{13}\text{C}$  NMR ( $\text{CDCl}_3$ , 125 MHz, ppm):  $\delta_C$  162.1 (C), 148.9 (C), 148.3 (C), 135.4 (C), 134.6 (CH), 128.6 (CH), 127.4 (CH), 127.3 (CH), 127.0 (CH), 126.4 (CH), 125.9 (CH), 120.9 (C).

### 2,7-Dimethylquinazolin-4(3H)-one (3va)

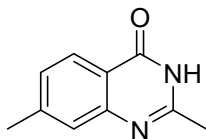

$^1\text{H}$  NMR ( $\text{CDCl}_3$ , 500 MHz, ppm):  $\delta_H$  11.22 (br, 1H), 8.16 (d,  $J = 8.0$  Hz, 1H), 7.47 (s, 1H), 7.29 (d,  $J = 8.0$ , 1H), 2.57 (s, 3H), 2.51 (s, 3H).

$^{13}\text{C}$  NMR ( $\text{CDCl}_3$ , 125 MHz, ppm):  $\delta_C$  163.6 (C), 153.1 (C), 149.6 (C), 146.0 (C), 128.1 (CH), 126.8 (CH), 126.1 (CH), 117.9 (C), 22.2 ( $\text{CH}_3$ ), 22.0 ( $\text{CH}_3$ ).

### 3-Benzyl-2-phenylquinazolin-4(3H)-one (3ab)

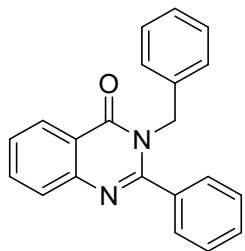

$^1\text{H}$  NMR ( $\text{CDCl}_3$ , 500 MHz, ppm):  $\delta_H$  8.38 (d,  $J$  = 8.0 Hz, 1H), 7.80-7.75 (m, 2H), 7.53 (ddd,  $J$  = 8.0, 6.0, 2.0 Hz, 1H), 7.47 (t,  $J$  = 7.5 Hz, 1H), 7.40 (t,  $J$  = 7.5 Hz, 2H), 7.34 (d,  $J$  = 7.5 Hz, 2H), 7.21-7.19 (m, 3H), 6.93-6.92 (m, 2H), 5.29 (s, 2H).

$^{13}\text{C}$  NMR ( $\text{CDCl}_3$ , 125 MHz, ppm):  $\delta_C$  162.6 (C), 156.5 (C), 147.4 (C), 136.7 (C), 135.4 (C), 134.6 (CH), 130.0 (CH), 128.7 (2 x CH), 128.6 (2 x CH), 128.2 (2 x CH), 127.8 (CH), 127.6 (CH), 127.3 (CH), 127.2 (CH), 127.1 (2 x CH), 121.0 (C), 48.9 ( $\text{CH}_2$ ).

### 3-(2-Methoxybenzyl)-2-phenylquinazolin-4(3H)-one (3ac)

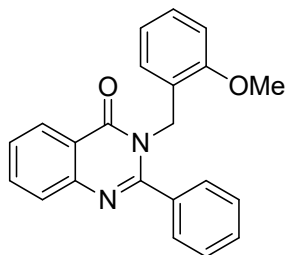

$^1\text{H}$  NMR ( $\text{CDCl}_3$ , 500 MHz, ppm):  $\delta_H$  8.37 (d,  $J$  = 8.0 Hz, 1H), 7.81- 7.75 (m, 2H), 7.53 (ddd,  $J$  = 8.0, 6.5, 1.5 Hz, 1H), 7.49- 7.45 (m, 1H), 7.41 (t,  $J$  = 8.0 Hz, 2H), 7.37- 7.36 (m, 2H), 7.13 (t,  $J$  = 8.0 Hz, 1H), 6.74 (d,  $J$  = 8.0 Hz, 2.0 Hz, 1H), 6.53 (d,  $J$  = 7.5 Hz, 1H), 6.46 (s, 1H), 5.24 (s, 2H), 3.70 (s, 3H).

$^{13}\text{C}$  NMR ( $\text{CDCl}_3$ , 125 MHz, ppm):  $\delta_C$  162.6 (C), 156.9 (C), 156.5 (C), 147.5 (C), 135.5 (C), 134.5 (CH), 129.7 (CH), 128.5 (2 x CH), 128.4 (CH), 127.9 (2 x CH), 127.7 (CH), 127.2 (2 x CH), 127.1 (CH), 124.9 (C), 120.9 (C), 120.6 (CH), 110.2 (CH), 55.2 ( $\text{CH}_2$ ), 44.7 ( $\text{CH}_3$ ).

### 3-(3-Methoxybenzyl)-2-phenylquinazolin-4(3H)-one (3ad)

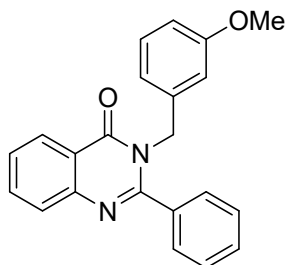

$^1\text{H}$  NMR ( $\text{CDCl}_3$ , 500 MHz, ppm):  $\delta_H$  8.37 (d,  $J$  = 8.0 Hz, 1H), 7.81- 7.75 (m, 2H), 7.53 (ddd,  $J$  = 8.0, 6.5, 1.5 Hz, 1H), 7.49- 7.45 (m, 1H), 7.41 (t,  $J$  = 8.0 Hz, 2H), 7.37- 7.36 (m, 2H), 7.13 (t,  $J$  =

8.0 Hz, 1H), 6.74 (d,  $J$  = 8.0 Hz, 2.0 Hz, 1H), 6.53 (d,  $J$  = 7.5 Hz, 1H), 6.46 (s, 1H), 5.24 (s, 2H), 3.70 (s, 3H).

$^{13}\text{C}$  NMR ( $\text{CDCl}_3$ , 125 MHz, ppm):  $\delta_{\text{C}}$  162.6 (C), 159.8 (C), 156.5 (C), 147.4 (C), 138.3 (C), 135.4 (C), 134.7 (CH), 130.0 (CH), 129.7 (CH), 128.7 (2 x CH), 128.2 (2 x CH), 127.7 (CH), 127.3 (CH), 127.2 (CH), 121.0 (C), 119.4 (C), 112.9 (2 x CH), 55.3 ( $\text{CH}_2$ ), 48.9 ( $\text{CH}_3$ ).

### 3-(4-Methoxybenzyl)-2-phenylquinazolin-4(3H)-one (3ae)

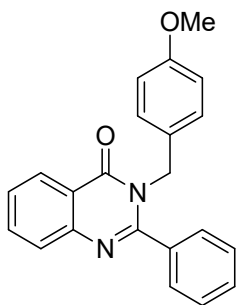

$^1\text{H}$  NMR ( $\text{CDCl}_3$ , 500 MHz, ppm):  $\delta_{\text{H}}$  8.38- 8.36 (m, 1H), 7.79-7.34 (m, 2H), 7.53-7.49 (m, 1H), 7.49- 7.47 (m, 1H), 7.42 (t,  $J$  = 7.5 Hz, 2H), 7.37- 7.35 (m, 2H), 6.86-6.84 (m, 2H), 6.74- 6.71 (m, 2H) 5.22 (s, 2H), 3.74 (s, 3H).

$^{13}\text{C}$  NMR ( $\text{CDCl}_3$ , 125 MHz, ppm):  $\delta_{\text{C}}$  162.5 (C), 156.4 (C), 160.0 (C), 156.4 (C), 147.3 (C), 135.4 (CH), 134.5 (CH), 129.9 (CH), 128.7 (C), 128.6 (2 x CH), 128.6 (2 x CH), 128.1 (2 x CH), 127.6 (CH), 127.1 (2 x CH), 121.0 (C), 113.9 (CH), 55.2 ( $\text{CH}_2$ ), 48.2 ( $\text{CH}_3$ ).

### 3-(2-Chlorobenzyl)-2-phenylquinazolin-4(3H)-one (3af)

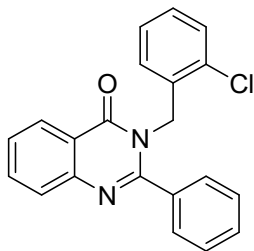

$^1\text{H}$  NMR ( $\text{CDCl}_3$ , 500 MHz, ppm):  $\delta_{\text{H}}$  8.37 (d,  $J$  = 8.0 Hz, 1H), 7.83-7.79 (m, 2H), 7.55 (ddd,  $J$  = 8.0, 6.0, 2.5 Hz, 1H), 7.44 (m, 1H), 7.35 (t,  $J$  = 7.5 Hz, 2H), 7.31-7.27 (m, 3H), 7.20-7.17 (m, 2H), 6.97-6.95 (m, 1H), 5.30 (s, 2H).

$^{13}\text{C}$  NMR ( $\text{CDCl}_3$ , 125 MHz, ppm):  $\delta_{\text{C}}$  162.4 (C), 156.5 (C), 147.4 (C), 134.9 (C), 134.7 (CH), 134.0 (C), 132.4 (C), 130.0 (CH), 129.5 (CH), 128.7 (2 x CH), 128.5 (CH), 127.8 (CH), 127.6 (2 x CH), 127.3 (CH), 127.2 (CH), 127.0 (2 x CH), 120.7 (C), 47.1 ( $\text{CH}_2$ ).

### 3-(4-Chlorobenzyl)-2-phenylquinazolin-4(3H)-one (3ag)



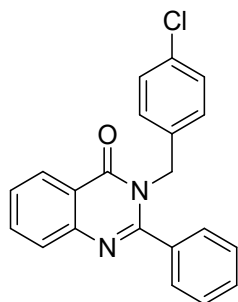

$^1\text{H}$  NMR ( $\text{CDCl}_3$ , 500 MHz, ppm):  $\delta_H$  8.36 (dd,  $J = 7.5, 1.0$  Hz, 1H), 7.81-7.75 (m, 2H), 7.54 (ddd,  $J = 8.5, 7.0, 1.5$  Hz, 1H), 7.50- 7.47 (m, 1H), 7.42 (t,  $J = 7.5$  Hz, 2H), 7.35-7.33 (m, 2H), 7.18-7.16 (m, 2H), 7.85- 7.87 (m, 2H), 5.23 (s, 2H).

$^{13}\text{C}$  NMR ( $\text{CDCl}_3$ , 125 MHz, ppm):  $\delta_C$  162.4 (C), 156.1 (C), 147.3 (C), 135.2 (C), 135.1 (C), 134.7 (CH), 133.4 (C), 130.0 (CH), 128.7 (2 x CH), 128.7 (2 x CH), 128.6 (2 x CH), 128.0 (2 x CH), 127.7 (CH), 127.3 (CH), 127.1 (CH), 120.8 (C), 48.2 ( $\text{CH}_2$ ).

### 3-(3-Trifluoromethylbenzyl)-2-phenylquinazolin-4(3H)-one (3ah)

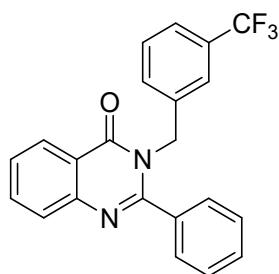

$^1\text{H}$  NMR ( $\text{CDCl}_3$ , 500 MHz, ppm):  $\delta_H$  8.33 (d,  $J = 8.0$  Hz, 1H), 7.76-7.70 (m, 2H), 7.51- 7.48 (m, 1H), 7.45- 7.41 (m, 2H), 7.36 (t,  $J = 7.5$  Hz, 2H), 7.29 (t,  $J = 8.0$  Hz, 1H), 7.24 (d,  $J = 8.0$  Hz, 2H), 7.17 (d,  $J = 8.0$  Hz, 1H), 6.97 (s, 1H), 5.26 (s, 2H).

$^{13}\text{C}$  NMR ( $\text{CDCl}_3$ , 125 MHz, ppm):  $\delta_C$  162.6 (C), 156.1 (C), 147.3 (C), 137.7 (C), 135.2 (C), 134.9 (CH), 130.2-131.0 (q,  $\text{CF}_3$ ), 130.8 (CH), 130.3 (CH), 129.3 (CH), 128.9 (2 x CH), 128.1 (2 x CH), 127.9 (CH), 127.5 (CH), 127.3 (CH), 124.6-124.5 (d,  $\text{C}_6\text{H-C-CF}_3$ ), 124.5-124.4 (d,  $\text{C}_6\text{H-C-CF}_3$ ), 120.9 (C), 48.3 ( $\text{CH}_2$ ).

### 3-Phenylethyl-2-phenylquinazolin-4(3H)-one (3ai)

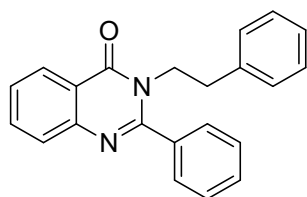

$^1\text{H}$  NMR ( $\text{CDCl}_3$ , 500 MHz, ppm):  $\delta_H$  8.37 (d,  $J = 8.0$  Hz, 1H), 7.78-7.73 (m, 2H), 7.55- 7.48 (m, 4H), 7.40- 7.38 (m, 2H), 7.18 (m, 3H), 6.88 (m, 2H), 4.19 (d,  $J = 7.5$  Hz, 2H), 2.91 (d,  $J = 2.5$  Hz, 2H).

$^{13}\text{C}$  NMR ( $\text{CDCl}_3$ , 125 MHz, ppm):  $\delta_{\text{C}}$  162.2 (C), 156.2 (C), 147.2 (C), 137.8 (C), 135.4 (C), 134.2 (CH), 129.8 (CH), 128.8 (4 x CH), 128.6 (2 x CH), 127.8 (2 x CH), 127.6 (CH), 127.1 (CH), 126.8 (CH), 126.7 (CH), 121.0 (C), 47.6 ( $\text{CH}_2$ ), 34.7 ( $\text{CH}_2$ ).

### 3-(2-Methylphenylethyl)-2-phenylquinazolin-4(3H)-one (3aj)

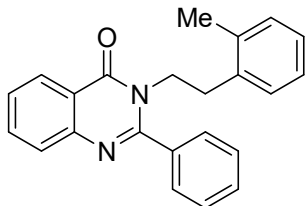

$^1\text{H}$  NMR ( $\text{CDCl}_3$ , 500 MHz, ppm):  $\delta_{\text{H}}$  8.38 (d,  $J = 8$  Hz, 1H), 7.81-7.77 (m, 2H), 7.56- 7.47 (m, 4H), 7.40- 7.38 (m, 2H), 7.09 (dd,  $J = 7.5$ , 1.0 Hz, 1H), 7.05 (d,  $J = 7.0$  Hz, 1H), 7.01 (td,  $J = 7.5$ , 0.5 Hz, 1H), 6.79 (d,  $J = 7$  Hz, 1H), 4.18 (t,  $J = 7.5$  Hz, 2H), 2.91 (t,  $J = 7.5$  Hz, 2H), 2.01 (s, 3H).

$^{13}\text{C}$  NMR ( $\text{CDCl}_3$ , 125 MHz, ppm):  $\delta_{\text{C}}$  162.3 (C), 156.4 (C), 136.7 (CH), 135.9 (C), 134.7 (CH), 130.5 (CH), 130.1 (C), 129.8 (CH), 129.0 (3 x CH), 128.1 (3 x CH), 127.6 (C), 127.3 (C), 127.1 (CH), 126.9 (CH), 126.3 (CH), 121.0 (C), 46.3 ( $\text{CH}_2$ ), 32.3 ( $\text{CH}_2$ ), 18.8 ( $\text{CH}_3$ ).

### 3-(3-Methylphenylethyl)-2-phenylquinazolin-4(3H)-one (3ak)

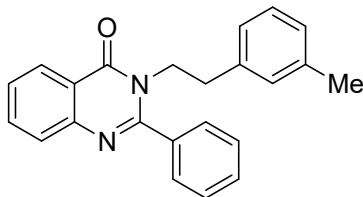

$^1\text{H}$  NMR ( $\text{CDCl}_3$ , 500 MHz, ppm):  $\delta_{\text{H}}$  8.37 (dd,  $J = 8.0$ , 1.0 Hz, 1H), 7.80-7.74 (m, 2H), 7.55- 7.48 (m, 4H), 7.40- 7.38 (m, 2H), 7.07 (t,  $J = 7.5$  Hz, 1H), 6.99 (d,  $J = 7.5$  Hz, 1H), 6.68- 6.65 (m, 2H), 4.19 (t,  $J = 8.0$  Hz, 2H), 2.87 (t,  $J = 7.5$  Hz, 2H), 2.22 (s, 3H).

$^{13}\text{C}$  NMR ( $\text{CDCl}_3$ , 125 MHz, ppm):  $\delta_{\text{C}}$  162.3 (C), 156.3 (C), 147.3 (C), 138.4 (C), 137.8 (C), 135.5 (C), 134.6 (CH), 129.9 (CH), 129.8 (CH), 128.9 (2 x CH), 128.6 (CH), 128.0 (2 x CH), 127.7 (CH), 127.5 (CH), 127.2 (CH), 126.9 (CH), 125.9 (CH), 121.1 (C), 47.7 ( $\text{CH}_2$ ), 34.7 ( $\text{CH}_2$ ), 21.4 ( $\text{CH}_3$ ).

### 3-(2-Methoxyphenylethyl)-2-phenylquinazolin-4(3H)-one (3al)

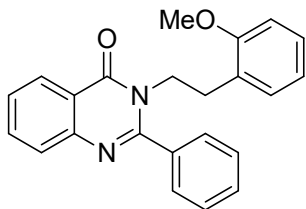

$^1\text{H}$  NMR ( $\text{CDCl}_3$ , 500 MHz, ppm):  $\delta_{\text{H}}$  8.38 (dd,  $J = 8.0$ , 1.0 Hz, 1H), 7.78-7.72 (m, 2H), 7.52 (ddd,  $J = 8.5$ , 8.0, 1.5 Hz, 1H), 7.47- 7.44 (m, 1H), 7.42- 7.38 (m, 2H), 7.19- 7.15 (m, 3H), 6.85- 6.83

(dd,  $J = 7.5, 2.0$  Hz, 1H), 6.76 (td,  $J = 7.5, 1.0$  Hz, 1H), 6.66 (d,  $J = 8.5$  Hz, 1H), 4.28 (t,  $J = 8.0$  Hz, 2H), 3.37 (s, 3H), 2.95 (t,  $J = 8.0$  Hz, 2H).

$^{13}\text{C}$  NMR ( $\text{CDCl}_3$ , 125 MHz, ppm):  $\delta_{\text{C}}$  162.5 (C), 157.8 (CH), 156.7 (C), 134.4 (C), 131.0 (CH), 129.5 (C), 128.6 (3 x CH), 128.2 (CH), 128.1 (3 x CH), 127.5 (C), 127.1 (CH), 126.9 (CH), 126.2 (C), 121.1 (C), 120.7 (CH), 110.2 (CH), 54.7 ( $\text{CH}_3$ ), 46.3 ( $\text{CH}_2$ ), 29.3 ( $\text{CH}_2$ ).

### 3-(3-Phenyl-1-propyl)-2-phenylquinazolin-4(3H)-one (3am)

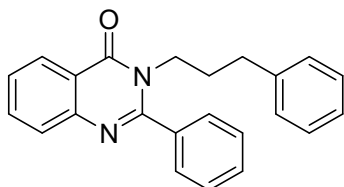

$^1\text{H}$  NMR ( $\text{CDCl}_3$ , 500 MHz, ppm):  $\delta_{\text{H}}$  8.34- 8.32 (m, 1H), 7.77-7.71 (m, 2H), 7.52- 7.46 (m, 6H), 7.19- 7.16 (m, 2H), 7.13- 7.11 (m, 1H), 6.98 (d,  $J = 6.5$  Hz, 2H), 3.99- 4.02 (m, 2H), 2.51 (t,  $J = 7.5$  Hz, 2H), 1.92- 1.98 (m, 2H).

$^{13}\text{C}$  NMR ( $\text{CDCl}_3$ , 125 MHz, ppm):  $\delta_{\text{C}}$  162.2 (C), 156.1 (C), 147.2 (C), 140.5 (C), 135.4 (C), 134.3 (CH), 129.8 (CH), 128.8 (2 x CH), 128.4 (2 x CH), 128.0 (2 x CH), 127.7 (2 x CH), 127.5 (CH), 127.0 (CH), 126.8 (CH), 126.0 (CH), 120.9 (C), 45.5 ( $\text{CH}_2$ ), 32.9 ( $\text{CH}_2$ ), 29.8 ( $\text{CH}_2$ ).

### 2,3-Diphenylquinazolin-4(3H)-one (3an)

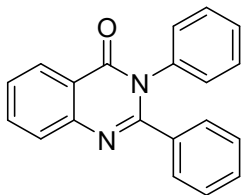

$^1\text{H}$  NMR ( $\text{CDCl}_3$ , 500 MHz, ppm):  $\delta_{\text{H}}$  8.20 (d,  $J = 8.0$  Hz, 1H), 7.91 (t,  $J = 7.5$  Hz, 1H), 7.77 (d,  $J = 8.0$  Hz, 1H), 7.61 (t,  $J = 8.0$  Hz, 1H), 7.37 (d,  $J = 7.0$  Hz, 2H), 7.34- 7.29 (m, 4H), 7.27- 7.20 (m, 4H).

$^{13}\text{C}$  NMR ( $\text{CDCl}_3$ , 125 MHz, ppm):  $\delta_{\text{C}}$  161.4 (C), 155.2 (C), 147.3 (C), 137.8 (C), 135.6 (C), 134.8 (CH), 129.5 (2 x CH), 128.9 (2 x CH), 128.8 (CH), 128.6 (2 x CH), 128.2 (CH), 127.5 (2 x CH), 127.4 (CH), 127.2 (CH), 126.5 (CH), 120.7 (C).

### 3-(4-Bromophenyl)-2-phenylquinazolin-4(3H)-one (3ao)

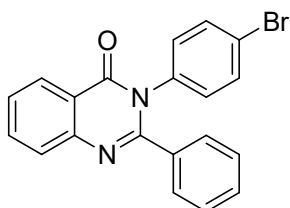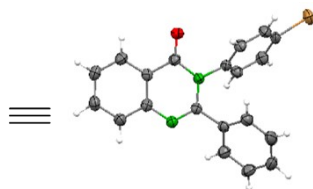

(CCDC number: 2057342)

$^1\text{H}$  NMR ( $\text{CDCl}_3$ , 500 MHz, ppm):  $\delta_H$  8.20 (d,  $J = 8.0$  Hz, 1H), 7.91 (t,  $J = 8.0$  Hz, 1H), 7.77 (d,  $J = 8.0$  Hz, 1H), 7.61 (t,  $J = 8.0$  Hz, 1H), 7.52 (d,  $J = 9.0$  Hz, 2H), 7.39- 7.38 (m, 2H), 7.33 (d,  $J = 8.5$  Hz, 2H), 7.29- 7.25 (m, 3H).

$^{13}\text{C}$  NMR ( $\text{CDCl}_3$ , 125 MHz, ppm):  $\delta_C$  161.4 (C), 154.8 (C), 147.2 (C), 137.3 (C), 135.4 (C), 134.9 (CH), 131.7 (2 x CH), 131.6 (2 x CH), 129.1 (CH), 128.9 (2 x CH), 127.6 (2 x CH), 127.4 (CH), 127.2 (CH), 126.5 (CH), 121.3 (C), 120.7 (C).

### 3-Butyl-2-phenylquinazolin-4(3H)-one (3ap)

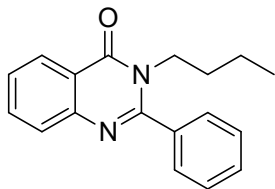

$^1\text{H}$  NMR ( $\text{CDCl}_3$ , 500 MHz, ppm):  $\delta_H$  8.34- 8.32 (m, 1H), 7.77-7.72 (m, 2H), 7.54- 7.48 (m, 6H), 4.00- 3.97 (m, 2H), 1.62- 1.56 (m, 2H), 1.21- 1.14 (m, 2H), 0.76 (t,  $J = 2.5$  Hz, 3H).

$^{13}\text{C}$  NMR ( $\text{CDCl}_3$ , 125 MHz, ppm):  $\delta_C$  162.2 (C), 156.2 (C), 147.2 (C), 135.6 (C), 134.2 (CH), 129.8 (CH), 128.7 (2 x CH), 127.8 (2 x CH), 127.5 (CH), 126.9 (CH), 126.8 (CH), 121.0 (C), 45.7 ( $\text{CH}_2$ ), 30.7 ( $\text{CH}_2$ ), 19.9 ( $\text{CH}_2$ ), 13.4 ( $\text{CH}_3$ ).

### 3-(2-Hydroxyethyl)-2-phenylquinazolin-4(3H)-one (3aq)

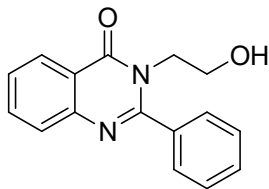

$^1\text{H}$  NMR ( $\text{CDCl}_3$ , 500 MHz, ppm):  $\delta_H$  8.31- 8.30 (m, 1H), 7.79-7.73 (m, 2H), 7.54- 7.50 (m, 6H), 4.22- 4.19 (m, 2H), 3.83- 3.81 (m, 2H), 2.94- 2.88 (m, 1H).

$^{13}\text{C}$  NMR ( $\text{CDCl}_3$ , 125 MHz, ppm):  $\delta_C$  163.9 (C), 156.3 (C), 147.4 (C), 135.4 (C), 134.9 (CH), 130.1 (CH), 129.1 (2 x CH), 128.3 (2 x CH), 127.7 (CH), 127.4 (CH), 126.5 (CH), 120.7 (C), 61.7 ( $\text{CH}_2$ ), 49.0 ( $\text{CH}_2$ ).

### 3-(4-Chlorobenzyl)- 2-methylquinazolin-4(3H)-one (3wg)

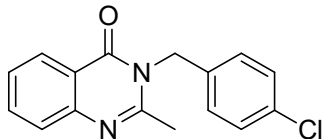

$^1\text{H}$  NMR ( $\text{CDCl}_3$ , 500 MHz, ppm):  $\delta_H$  8.13 (d,  $J = 7.0$  Hz, 1H), 7.86- 7.83 (m, 1H), 7.66 (d,  $J = 8.0$  Hz, 1H), 7.56- 7.52 (m, 2H), 7.34 (t,  $J = 7.0$  Hz, 1H), 7.27 (t,  $J = 7.5$  Hz, 1H), 6.81 (d,  $J = 7.5$  Hz, 1H), 5.38 (s, 1H), 2.46 (s, 3H).

$^{13}\text{C}$  NMR ( $\text{CDCl}_3$ , 125 MHz, ppm):  $\delta_{\text{C}}$  161.3 (C), 154.9 (C), 147.1 (C), 134.7 (CH), 133.4 (CH), 131.5 (C), 129.6 (CH), 129.0 (CH), 127.8 (CH), 126.7 (CH), 126.6 (CH), 126.4 (CH), 126.1 (CH), 119.7 (C), 44.7 ( $\text{CH}_2$ ), 22.6 ( $\text{CH}_3$ ).

**2-Methyl-3-(3-methoxybenzyl)quinazolin-4(3H)-one (3wd)**

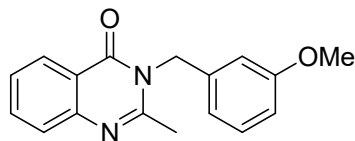

$^1\text{H}$  NMR ( $\text{CDCl}_3$ , 500 MHz, ppm):  $\delta_{\text{H}}$  8.15 (dd,  $J = 8.0, 1.5$  Hz, 1H), 7.84- 7.80 (m, 1H), 7.62 (d,  $J = 8.0$  Hz, 1H), 7.51 (t,  $J = 7.5$  Hz, 1H), 7.25 (t,  $J = 8.0$  Hz, 1H), 6.85 (dd,  $J = 8.0, 2.0$  Hz, 1H), 6.78 (m, 1H), 6.69 (d,  $J = 7.5$  Hz, 1H), 5.35 (s, 2H), 3.72 (s, 3H), 2.48 (s, 3H).

$^{13}\text{C}$  NMR ( $\text{CDCl}_3$ , 125 MHz, ppm):  $\delta_{\text{C}}$  161.5 (C), 159.5 (C), 155.1 (C), 147.1 (C), 138.1 (C), 134.5 (CH), 130.0 (C), 126.6 (CH), 126.5 (CH), 126.4 (CH), 119.8 (CH), 118.1 (CH), 112.5 (CH), 112.4 (CH), 55.0 ( $\text{CH}_2$ ), 46.2 ( $\text{CH}_3$ ), 22.9 ( $\text{CH}_3$ ).

**2-Methyl-3-(4-methoxybenzyl)quinazolin-4(3H)-one (3we)**

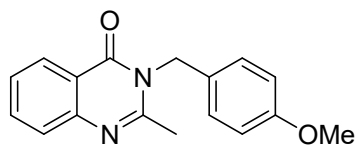

$^1\text{H}$  NMR ( $\text{CDCl}_3$ , 500 MHz, ppm):  $\delta_{\text{H}}$  8.15 (dd,  $J = 8.0, 1.5$  Hz, 1H), 7.82 (ddd,  $J = 8.5, 7.5, 1.5$  Hz, 1H), 7.62 (d,  $J = 8.0$  Hz, 1H), 7.53- 7.50 (m, 1H), 7.25 (t,  $J = 8.0$  Hz, 1H), 6.85 (dd,  $J = 8.0, 2.0$  Hz, 1H), 6.78 (m, 1H), 6.69 (d,  $J = 7.5$  Hz, 1H), 5.35 (s, 2H), 3.72 (s, 3H), 2.48 (s, 3H).

$^{13}\text{C}$  NMR ( $\text{CDCl}_3$ , 125 MHz, ppm):  $\delta_{\text{C}}$  161.0 (C), 154.9 (C), 147.0 (C), 138.3 (C), 134.3 (C), 128.8 (2 x CH), 128.6 (2 x CH), 126.6 (CH), 126.5 (CH), 126.2 (CH), 126.1 (CH), 119.9 (C), 45.6 ( $\text{CH}_2$ ), 33.6 ( $\text{CH}_3$ ), 22.7 ( $\text{CH}_3$ ).

**Indolo[2,1-b]quinazoline-6,12-dione (4aa)**

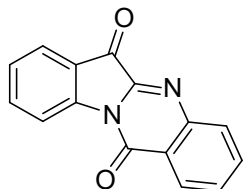

$^1\text{H}$  NMR (500 MHz,  $\text{DMSO}-d_6$ , ppm):  $\delta_{\text{H}}$  8.49 (d,  $J = 8.0$  Hz, 1H), 8.33 (d,  $J = 8.0$  Hz, 1H), 7.95 (d,  $J = 3.5$  Hz, 2H), 7.89- 7.86 (m, 2H), 7.76- 7.73 (m, 1H), 7.48 (t,  $J = 7.5$  Hz, 1H).

$^{13}\text{C}$  NMR (125 MHz, DMSO- $d_6$ , ppm):  $\delta_{\text{C}}$  182.5 (C), 157.7 (C), 146.5 (C), 145.9 (C), 145.0 (C), 137.7 (CH), 135.2 (CH), 129.9 (CH), 129.8 (CH), 126.9 (2 x CH), 124.7 (CH), 123.3 (C), 122.3 (C), 117.0 (CH).

**2,8-dimethylindolo[2,1-*b*]quinazoline-6,12-dione (4bb)**

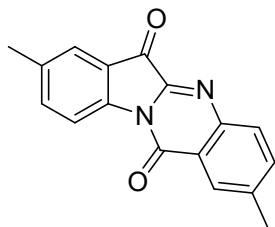

$^1\text{H}$  NMR (500 MHz, DMSO- $d_6$ , ppm):  $\delta_{\text{H}}$  8.34 (d,  $J$  = 8.0 Hz, 1H), 8.11 (s, 1H), 7.83 (d,  $J$  = 8.0 Hz, 1H), 7.75 (dd,  $J$  = 8.5, 1.5 Hz, 1H), 7.68- 7.66 (m, 2H), 2.52 (s, 3H), 2.41 (s, 3H).

$^{13}\text{C}$  NMR (125 MHz, DMSO- $d_6$ , ppm):  $\delta_{\text{C}}$  182.5 (C), 157.4 (C), 144.6 (C), 144.4 (C), 143.9 (C), 140.2 (C), 138.1 (CH), 136.6 (C), 136.1 (CH), 129.8 (CH), 126.5 (CH), 124.7 (CH), 123.1 (C), 122.4 (C), 116.8 (CH), 21.0 (CH<sub>3</sub>), 20.4 (CH<sub>3</sub>).

**2,8-Difluoroindolo[2,1-*b*]quinazoline-6,12-dione (4cc)**

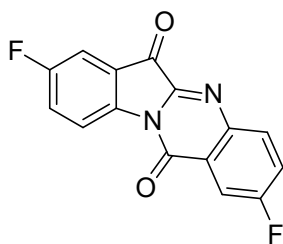

$^1\text{H}$  NMR (500 MHz, DMSO- $d_6$ , ppm):  $\delta_{\text{H}}$  8.49 (dd,  $J$  = 8.5, 4.0 Hz, 1H), 8.07- 8.03 (m, 2H), 7.85 (td,  $J$  = 8.5, 3.5 Hz, 1H), 7.81 (dd,  $J$  = 7.0, 2.5 Hz, 1H), 7.74 (td,  $J$  = 9.0, 2.5 Hz, 1H).

$^{13}\text{C}$  NMR (125 MHz, DMSO- $d_6$ , ppm):  $\delta_{\text{C}}$  181.4 (C), 163.1 (C), 161.4 (C), 160.3 (C-F), 156.8 (C), 144.9 (C), 142.7 (C-F), 132.8 (C<sub>m</sub>H-CF), 125.1 (C), 125.0 (C), 123.9 (C<sub>o</sub>H- CF), 123.4 (C<sub>o</sub>H- CF), 118.9 (C<sub>m</sub>H-CF), 112.4 (C<sub>o</sub>H- CF), 111.7 (C<sub>o</sub>H- CF).

NMR data of **2,8-dichloroindolo[2,1-*b*]quinazoline-6,12-dione (4dd)** was not collected because of its very poor solubility in various deuterated solvents.

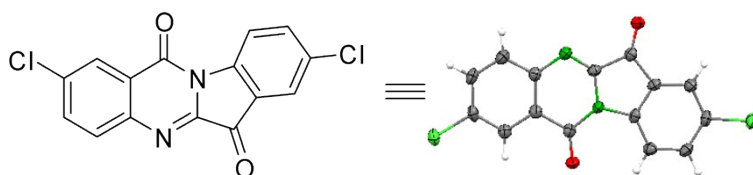

X-ray crystal structure of compound **4dd** (CCDC number: 2057341)

**2,8-Dibromoindolo[2,1-*b*]quinazoline-6,12-dione (4ee)**

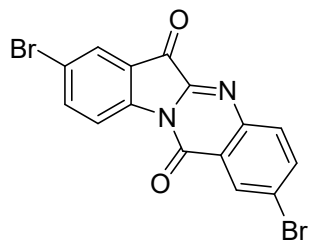

$^1\text{H}$  NMR (500 MHz,  $\text{DMSO-}d_6$ , ppm):  $\delta_H$  8.41- 8.39 (m, 2H), 8.14 (dd,  $J = 8.5, 2.5$  Hz 1H), 8.09- 8.06 (m, 2H), 7.92 (d,  $J = 8.5$  Hz, 1H).

$^{13}\text{C}$  NMR (125 MHz,  $\text{DMSO-}d_6$ , ppm):  $\delta_C$  182.5 (C), 157.4 (C), 144.6 (C), 144.4 (C), 143.9 (C), 140.2 (C), 138.1 (CH), 136.96 (C), 136.1 (CH), 129.8 (CH), 126.5 (CH), 124.7 (CH), 123.1 (C), 122.4 (C), 116.8 (CH).

**Dimethyl 6,12-dioxo-6,12-dihydroindolo[2,1-*b*]quinazoline-2,8-dicarboxylate (4ff)**

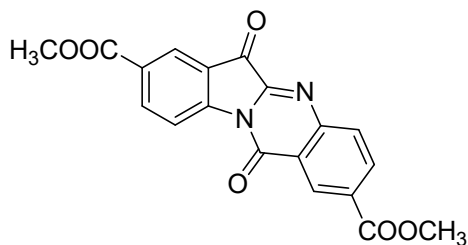

$^1\text{H}$  NMR (500 MHz,  $\text{DMSO-}d_6$ , ppm):  $\delta_H$  8.83 (s, 1H), 8.62 (d,  $J = 8.5$  Hz, 1H), 8.45 (dd,  $J = 14.0, 8.5$  Hz, 2H), 8.30 (s, 1H), 8.10 (d,  $J = 8.5$  Hz, 1H), 3.96 (s, 3H), 3.93 (s, 3H).

The  $^{13}\text{C}$ -NMR data was not collected because of its very poor solubility in various deuterated solvents.

## 2-Phenylquinazolin-4(3H)-one (3aa)

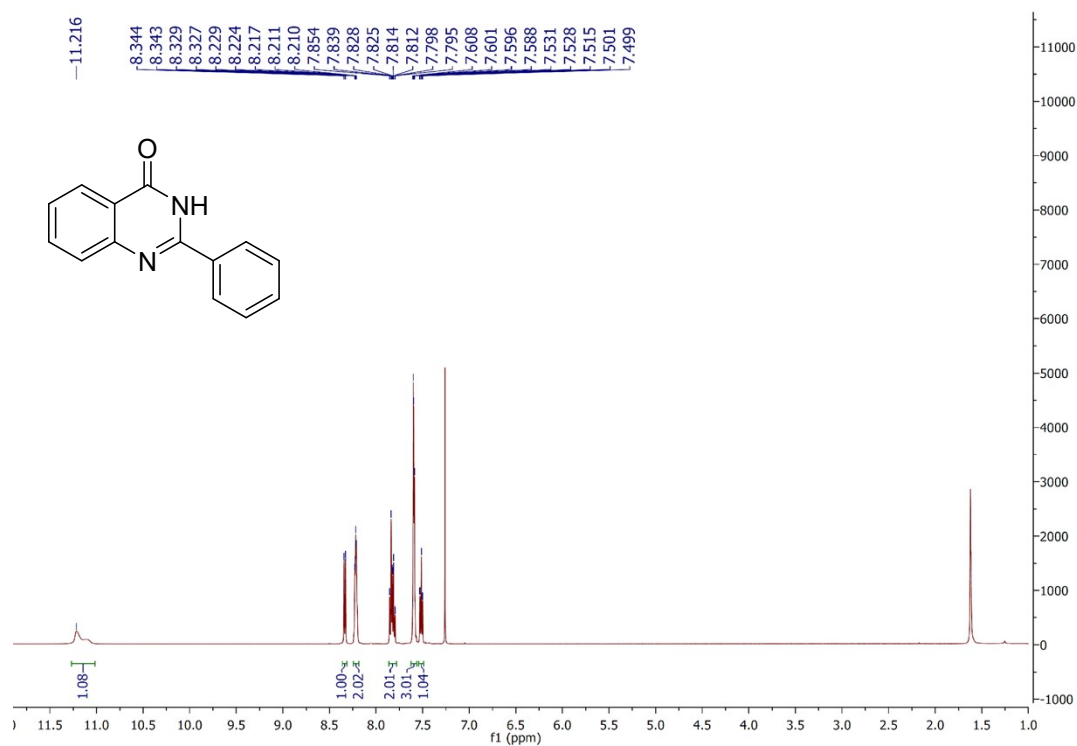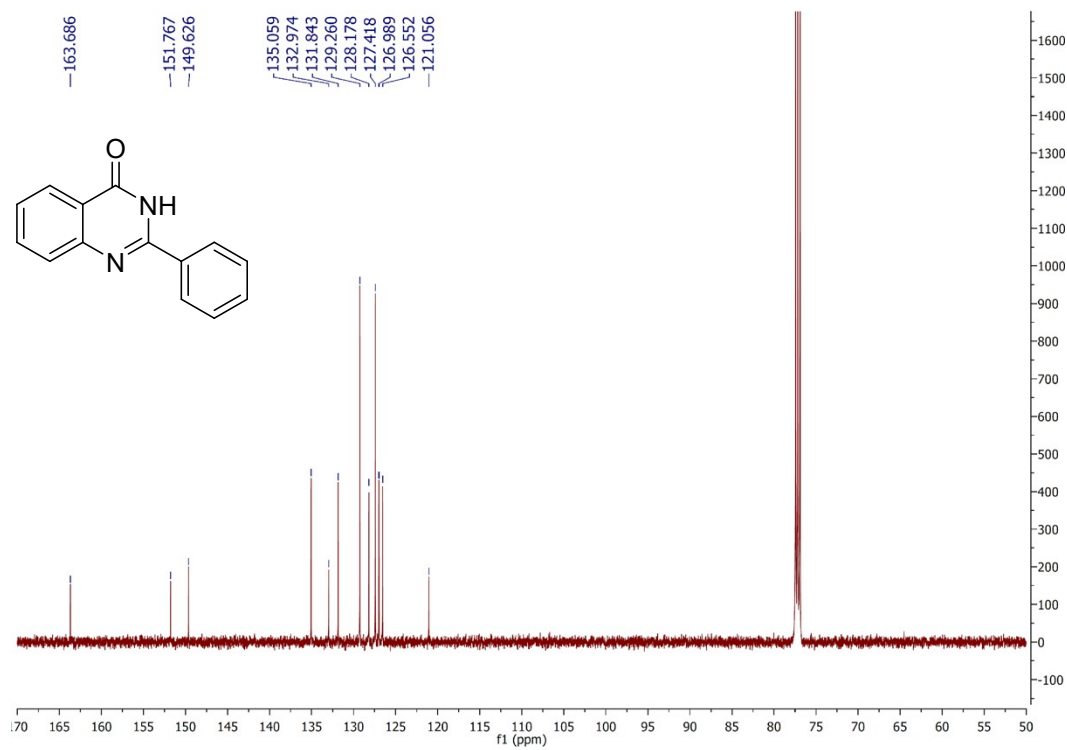



## 2-(2-Methylphenyl)quinazolin-4(3H)-one (3ba)

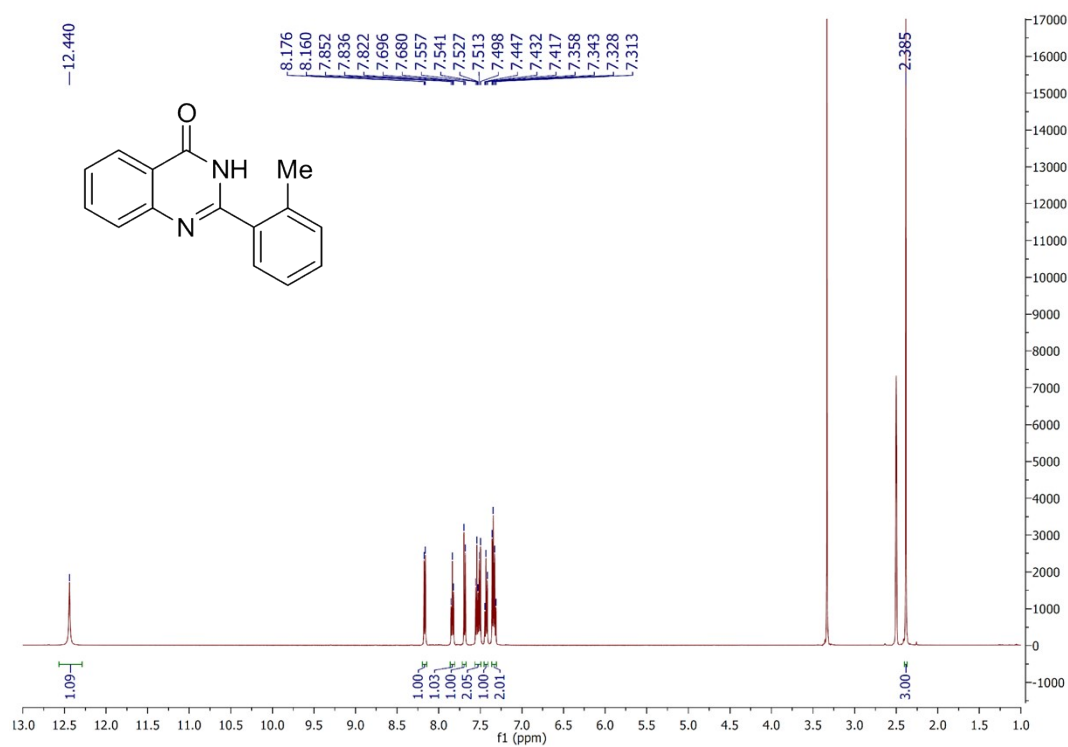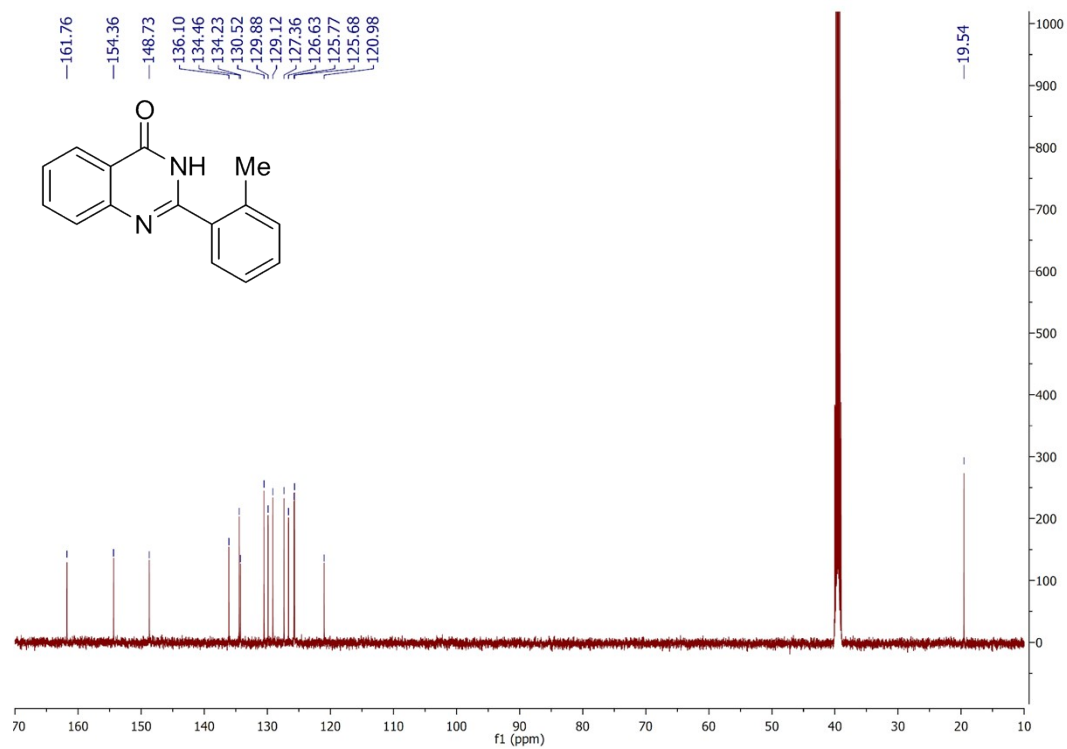

# 2-(3-Methylphenyl)quinazolin-4(3H)-one (3ca)

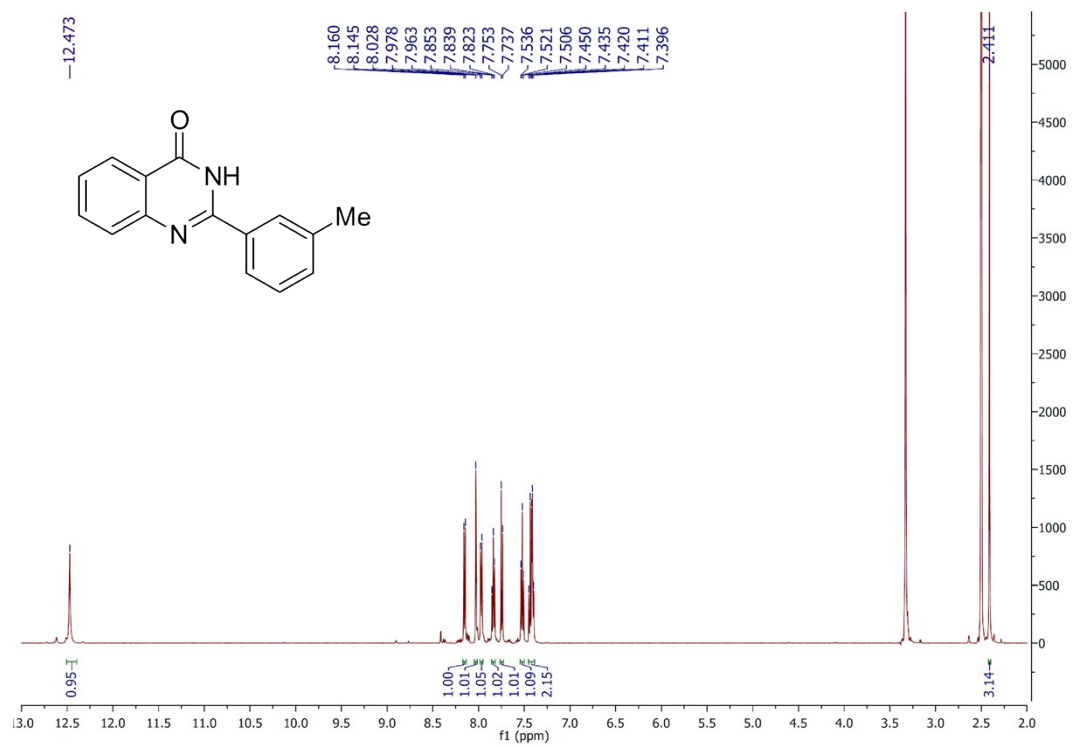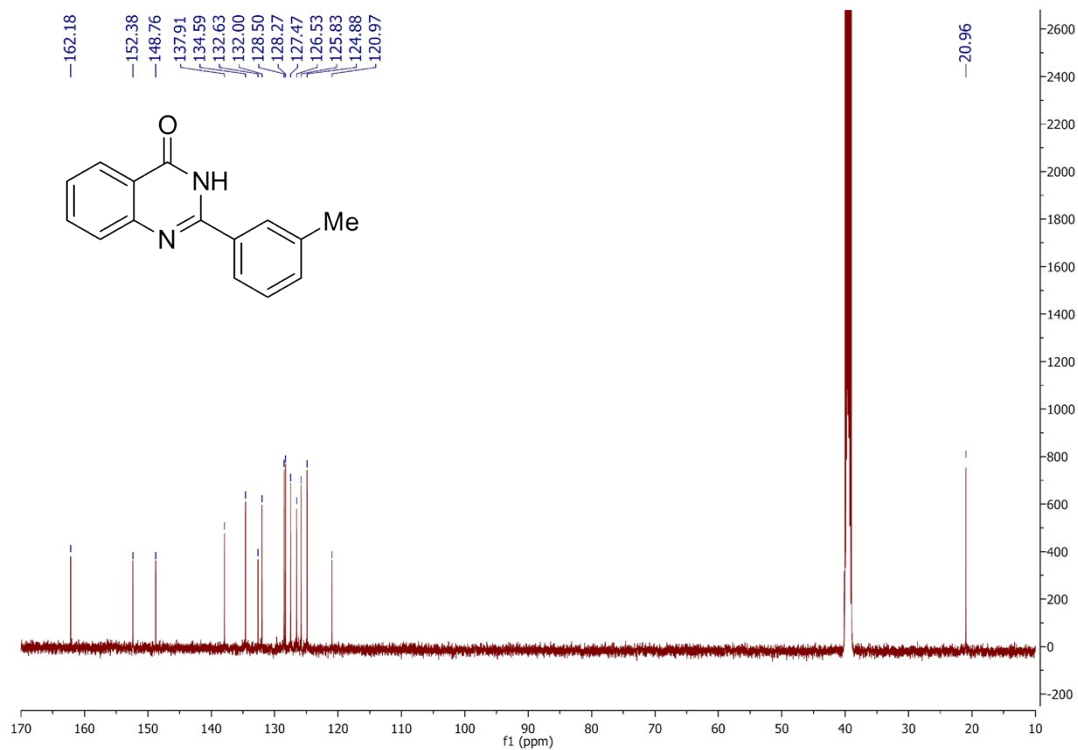

## 2-(3-Methoxyphenyl)quinazolin-4(3H)-one (3da)

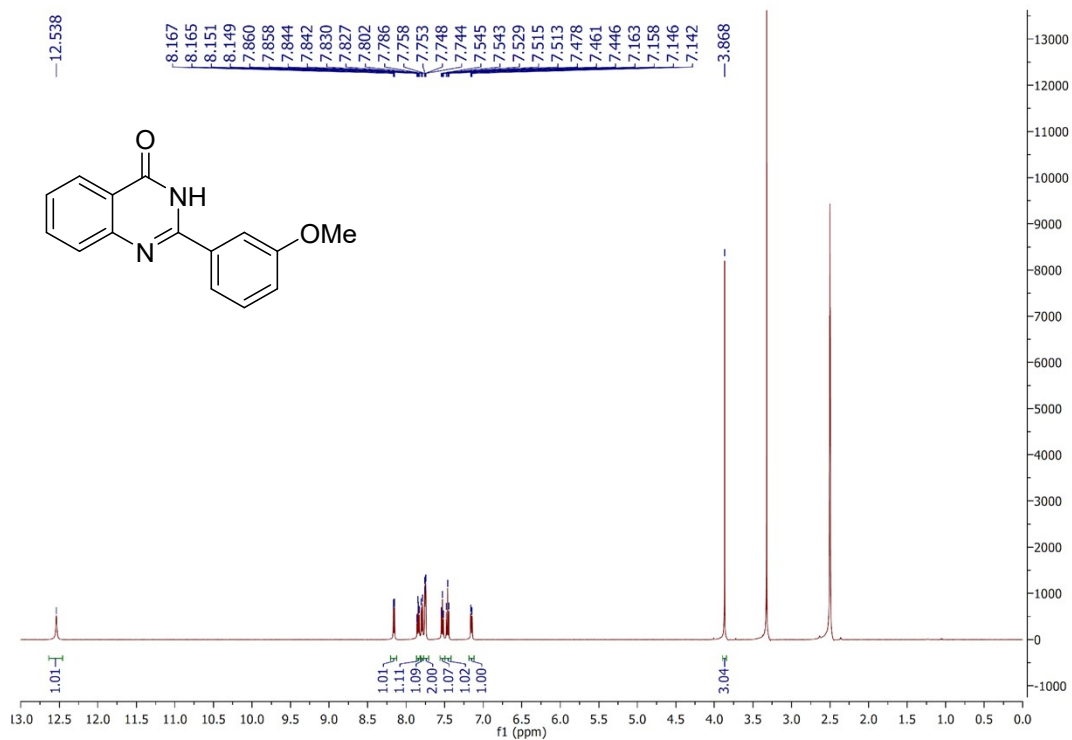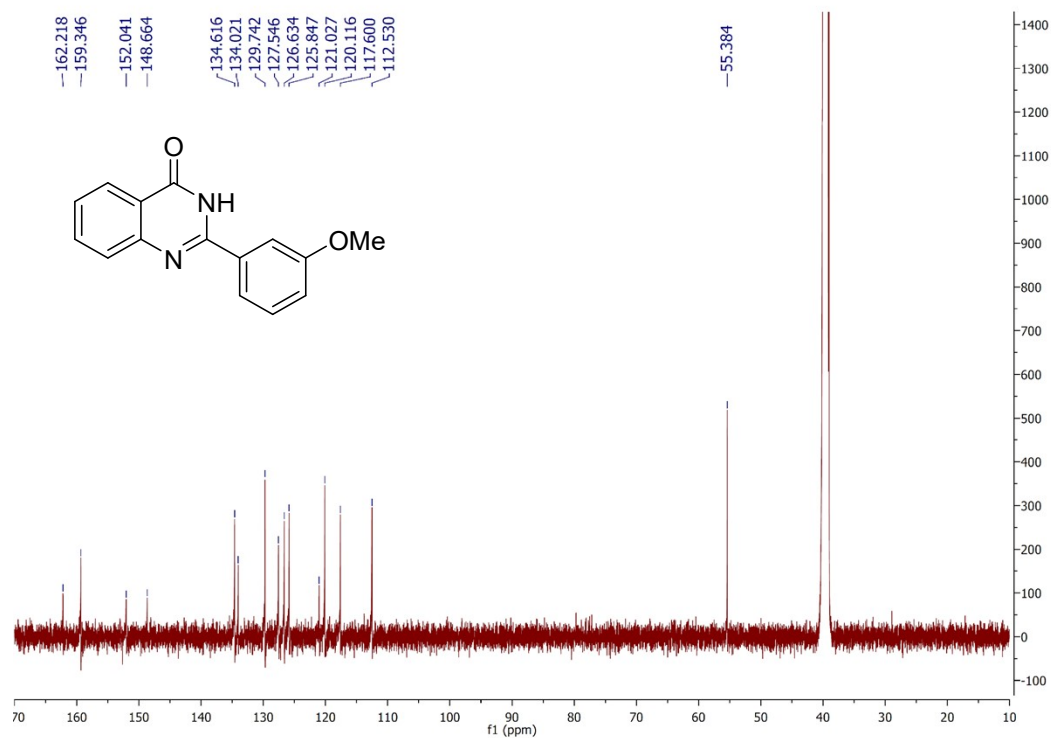

## 2-(4-Methoxyphenyl)quinazolin-4(3H)-one (3ea)

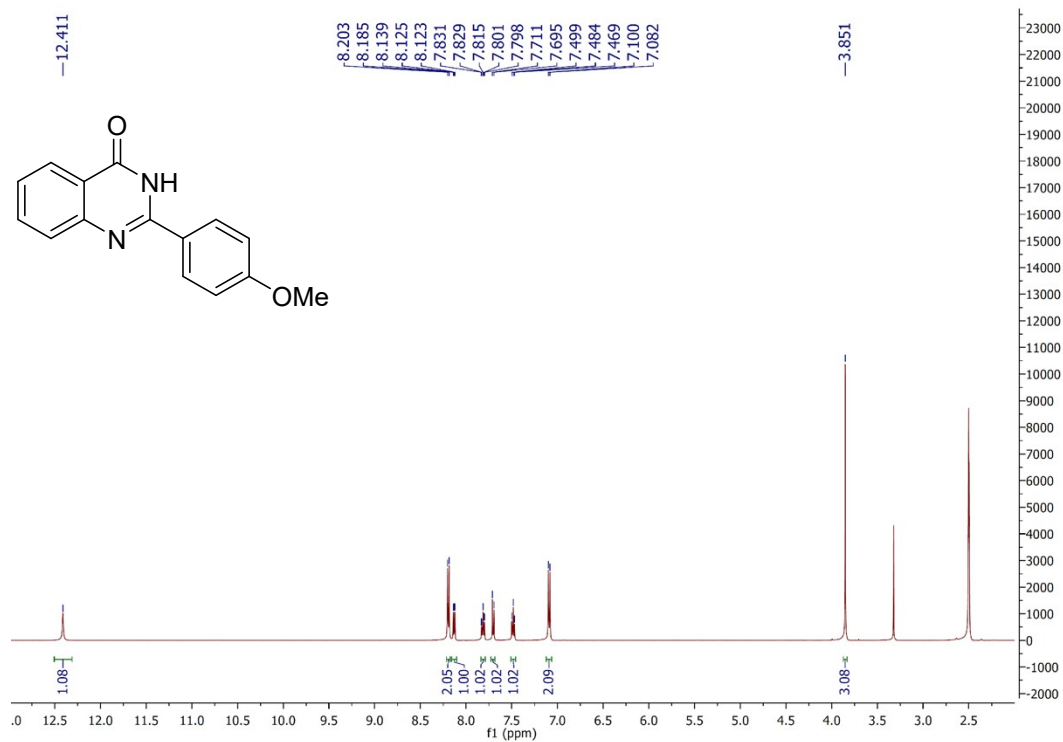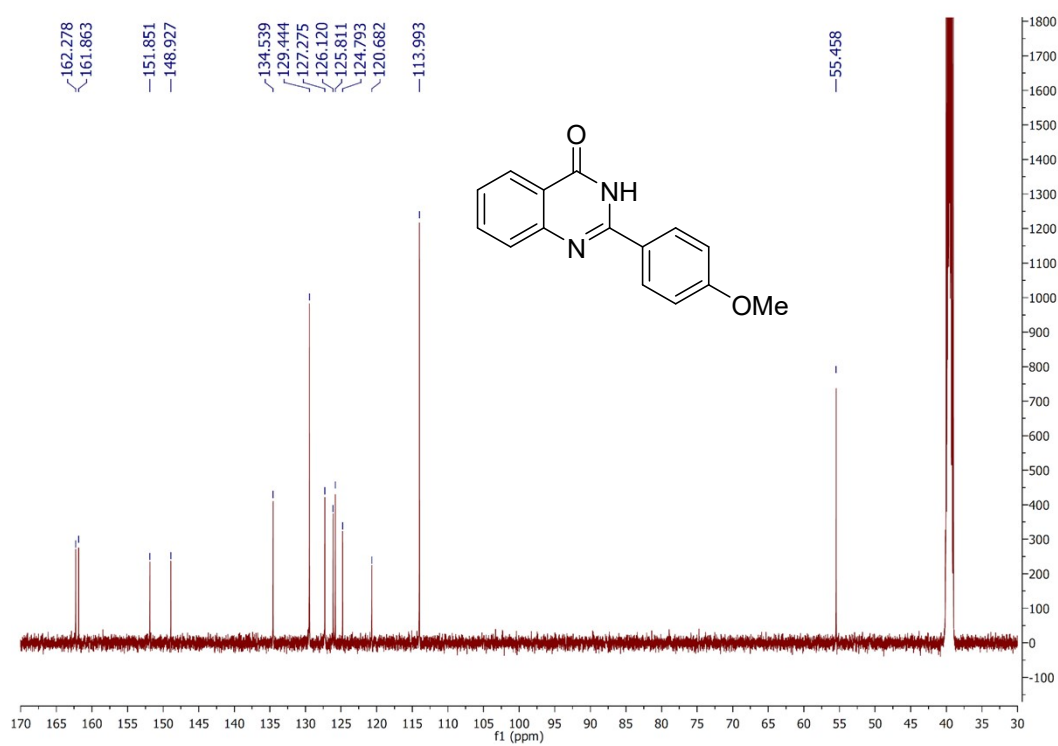

## 2-(2-Chlorophenyl)quinazolin-4(3H)-one (3fa)

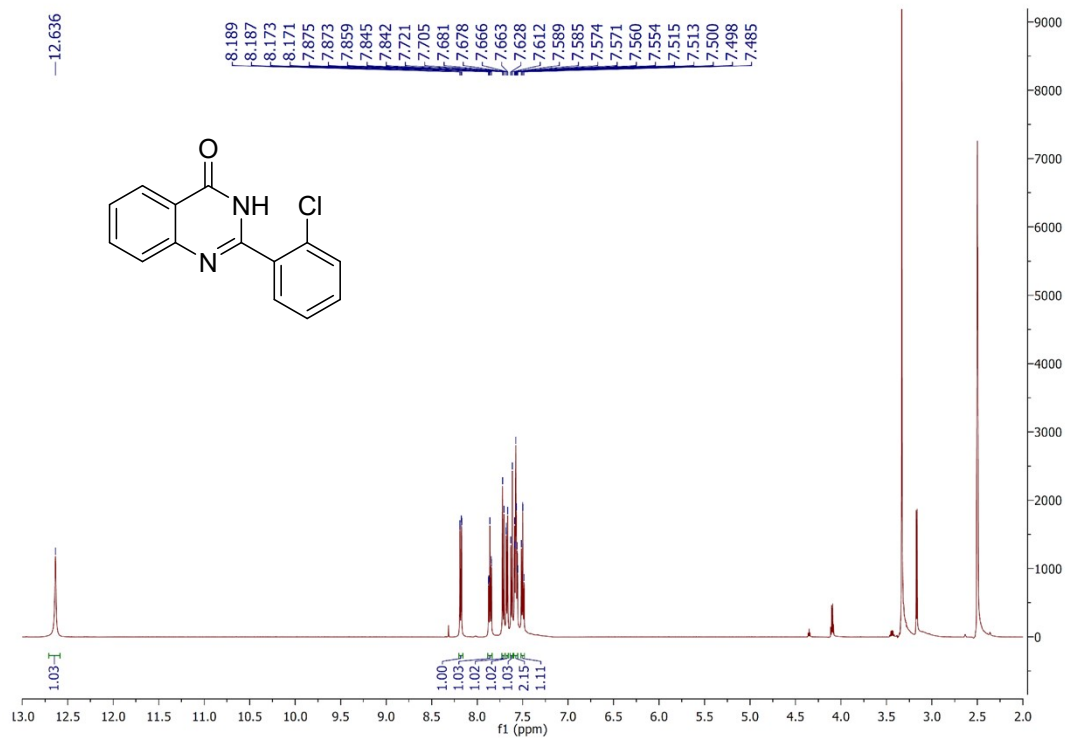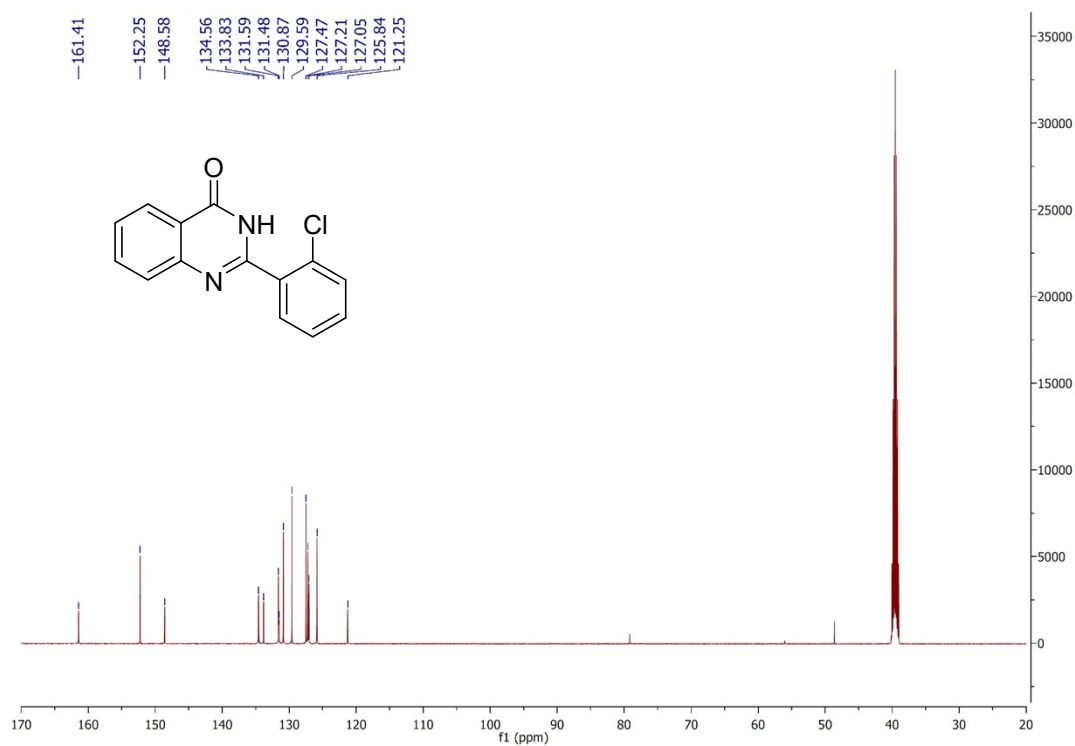

## 2-(3-Chlorophenyl)quinazolin-4(3H)-one (3ga)

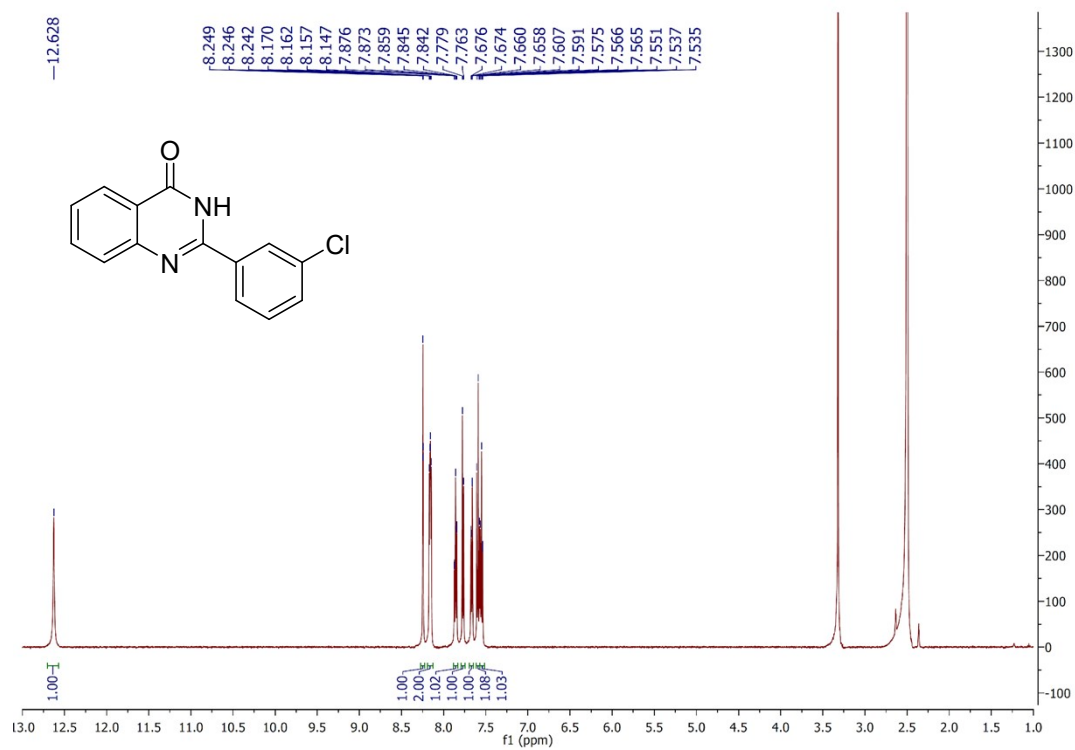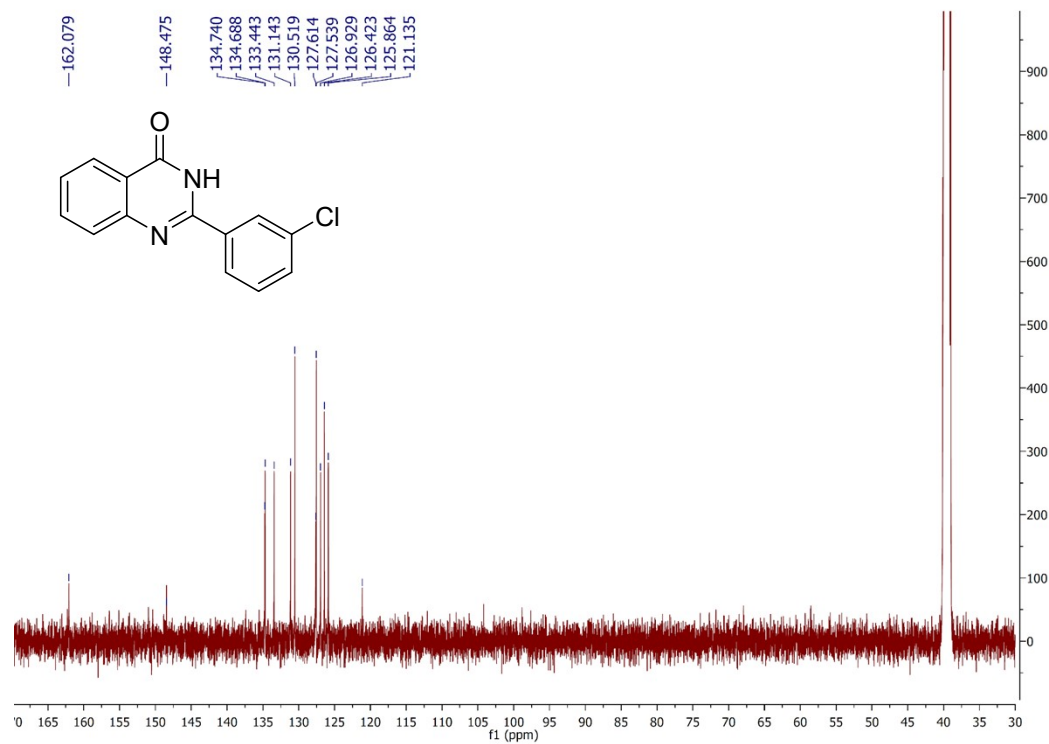

## 2-(4-Chlorophenyl)quinazolin-4(3H)-one (3ha)

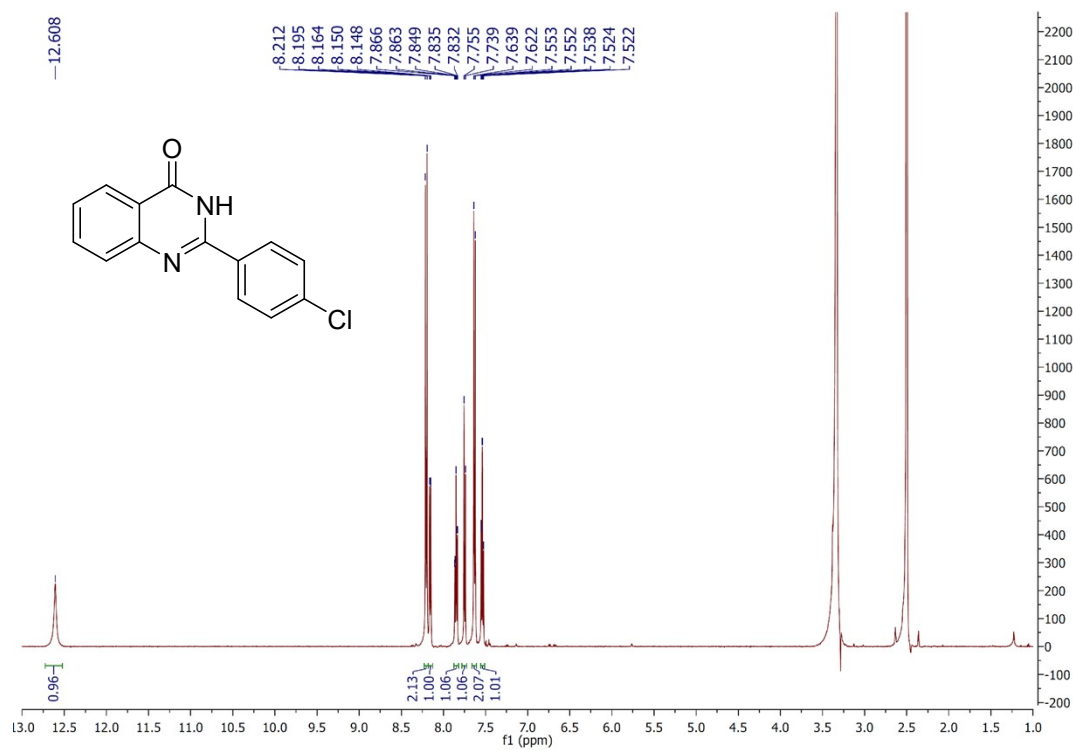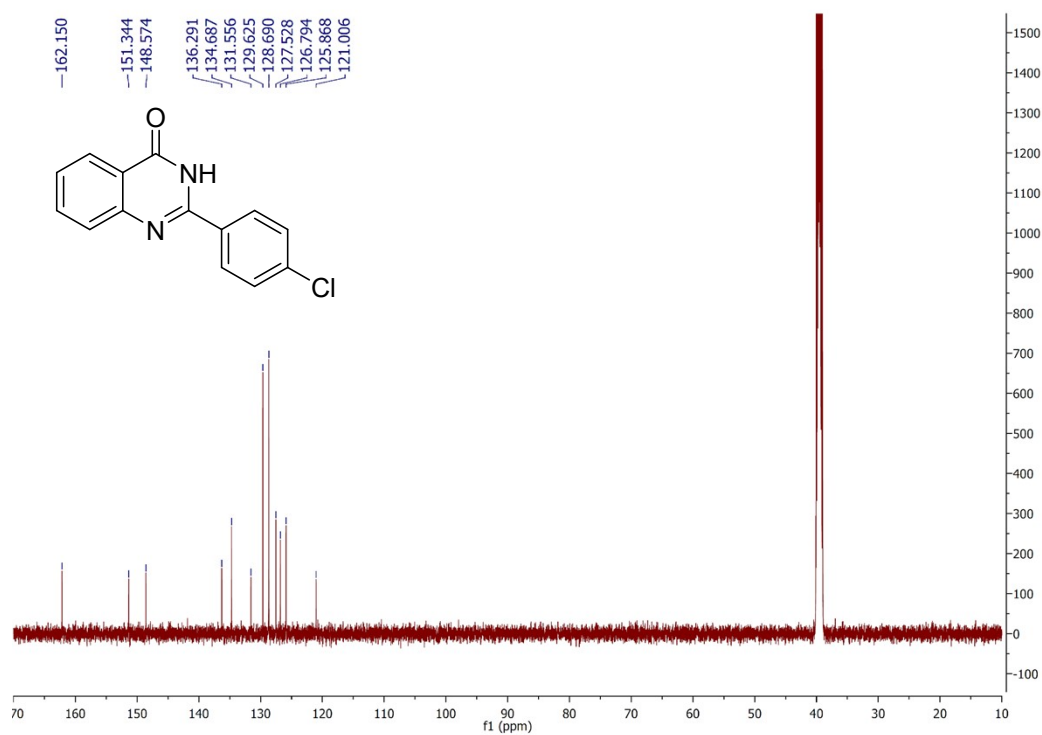

## 2-(2-Hydroxyphenyl)quinazolin-4(3H)-one (3ia)

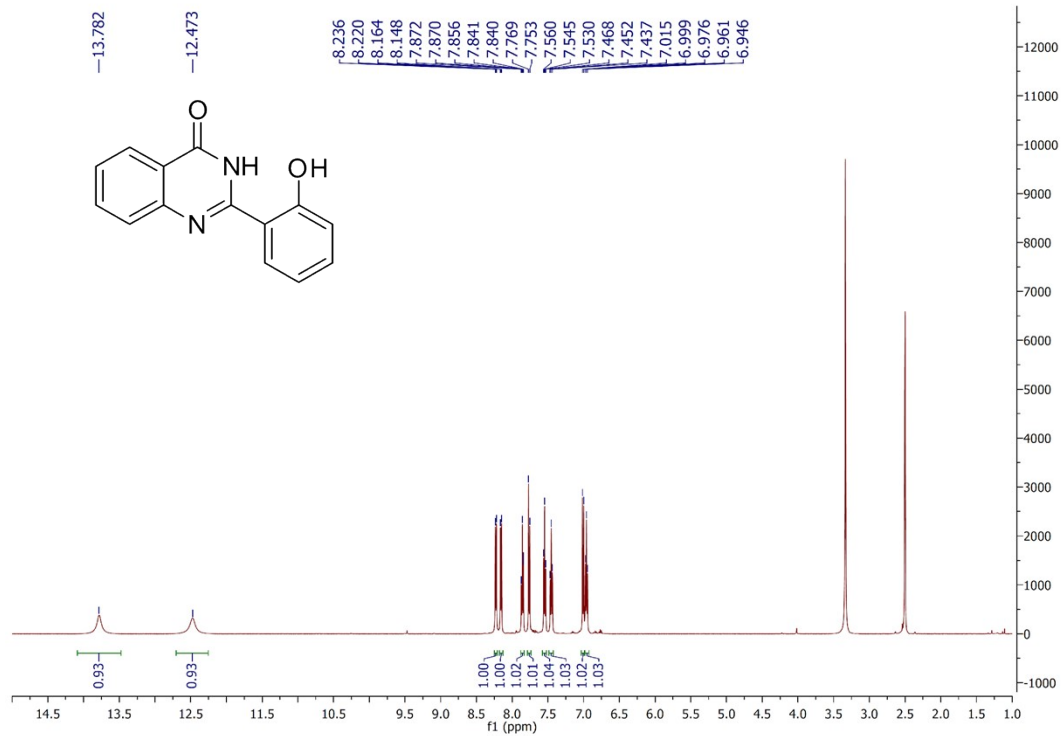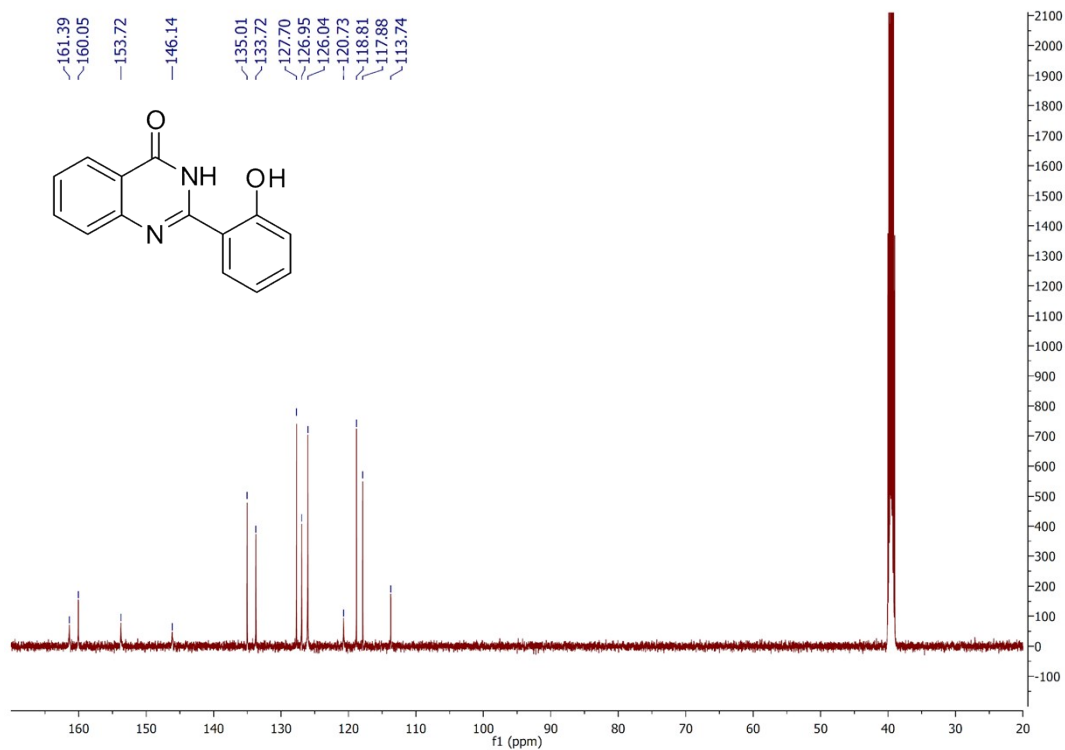



## 2-(3-Hydroxyphenyl)quinazolin-4(3H)-one (3ja)

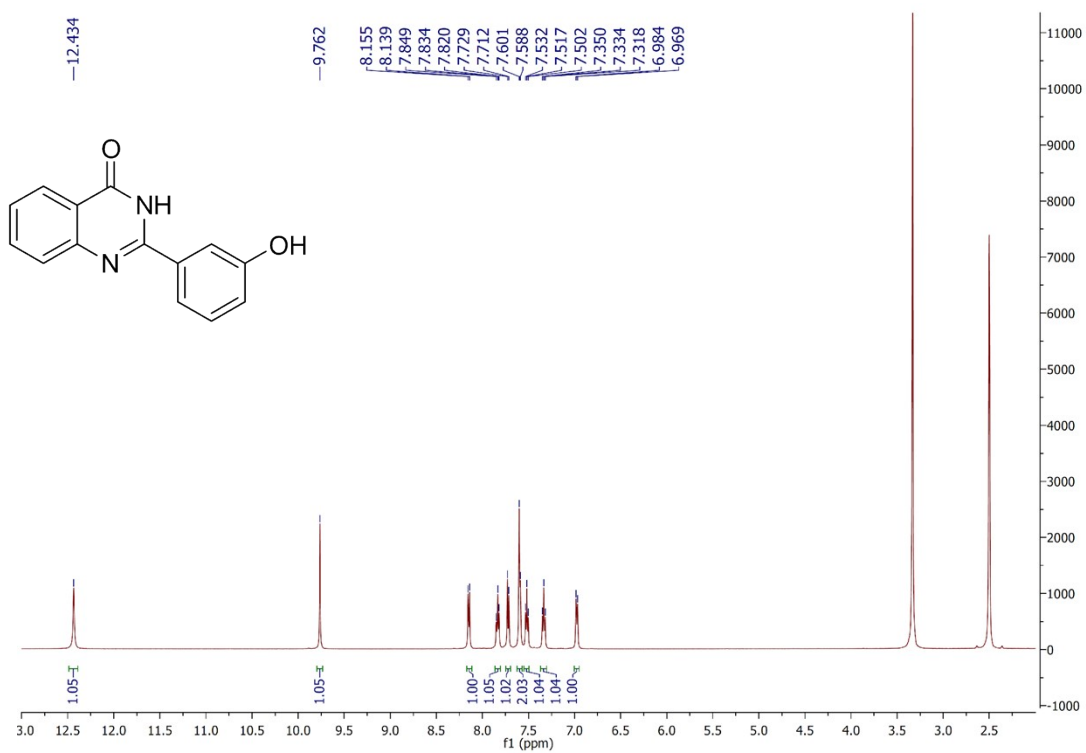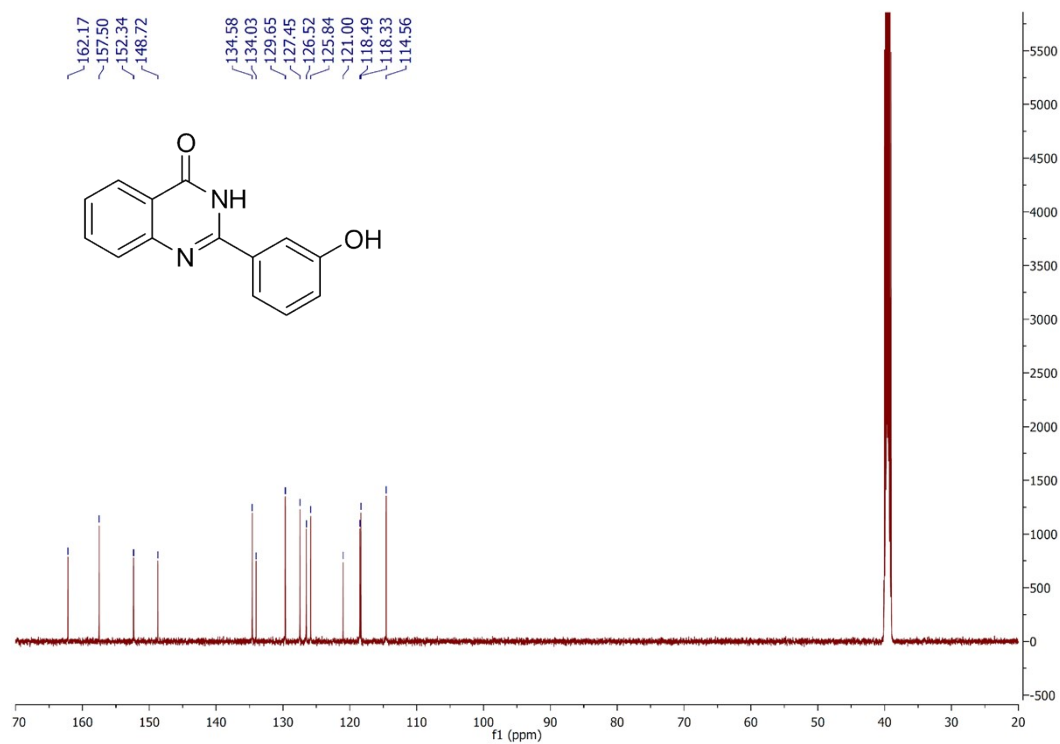

## 2-(4-Hydroxyphenyl)quinazolin-4(3H)-one (3ka)

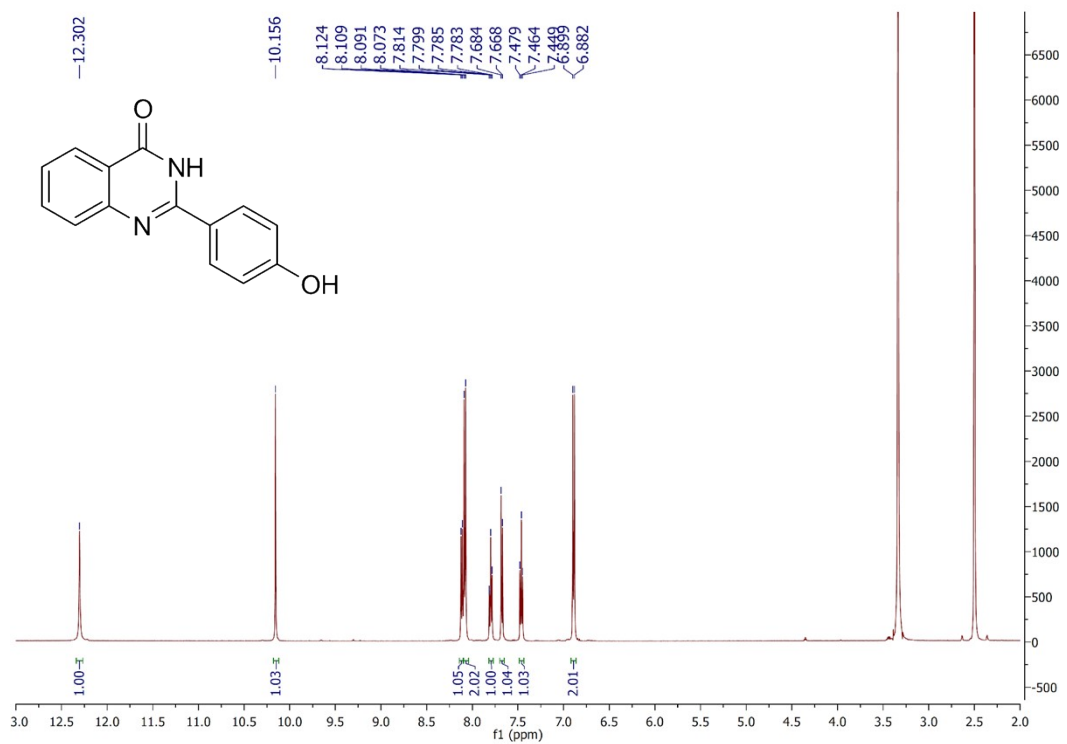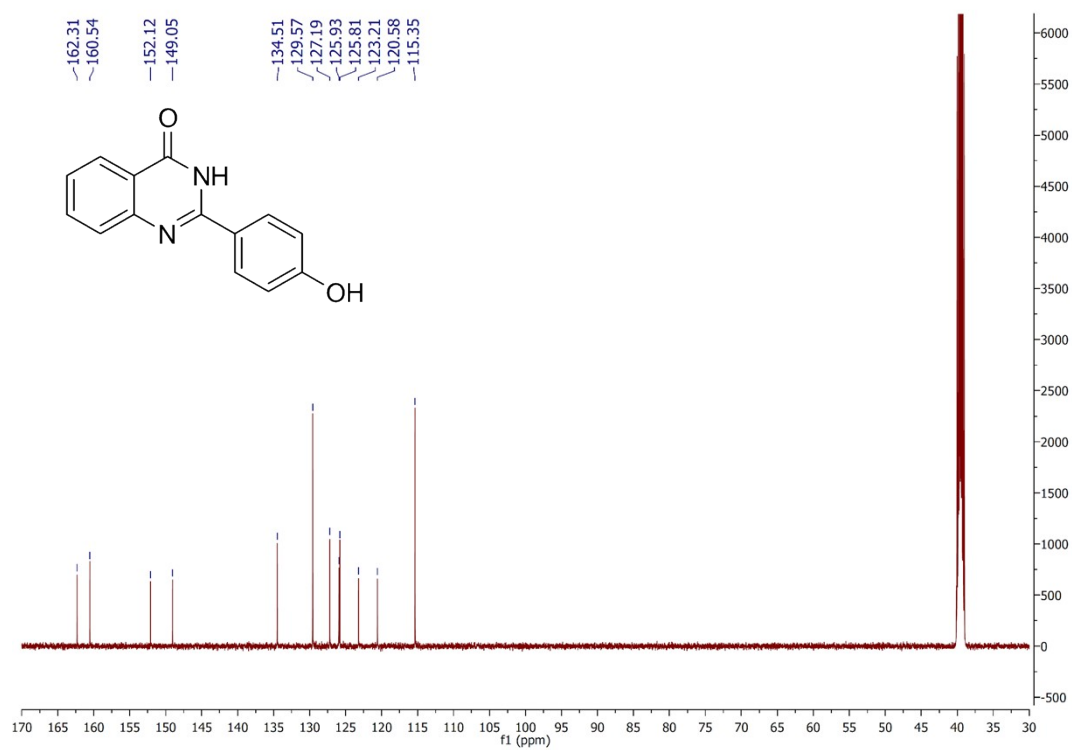

# 2-(2-Nitrophenyl)quinazolin-4(3H)-one (3la)

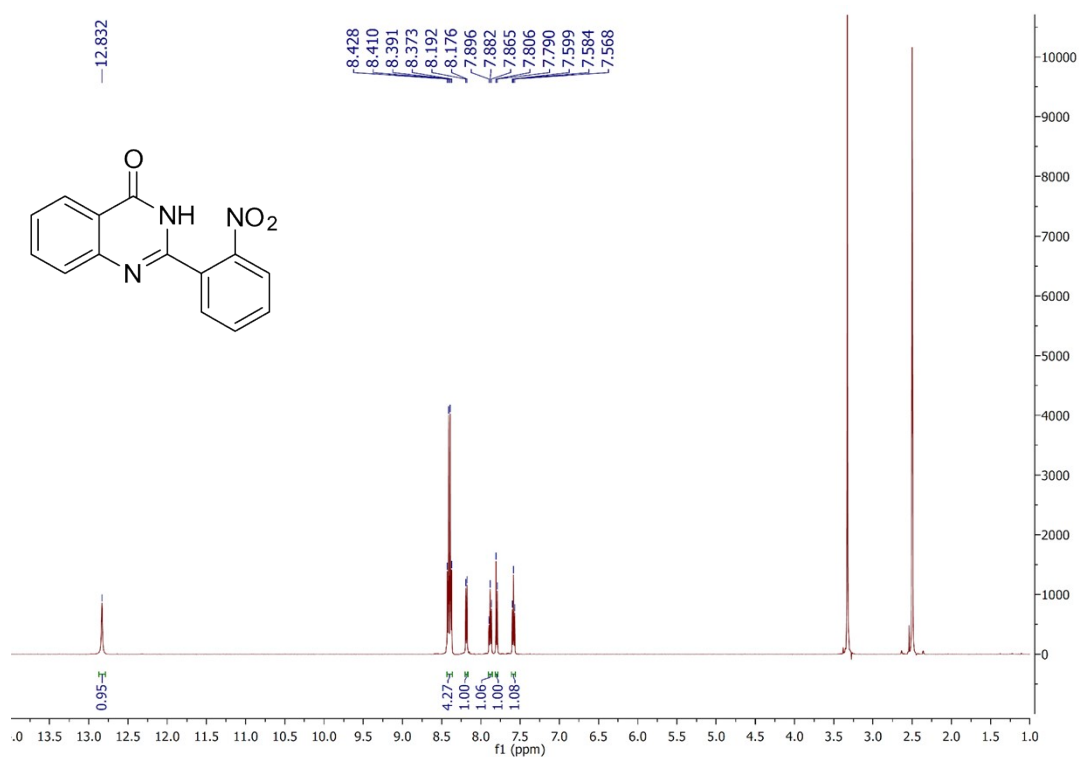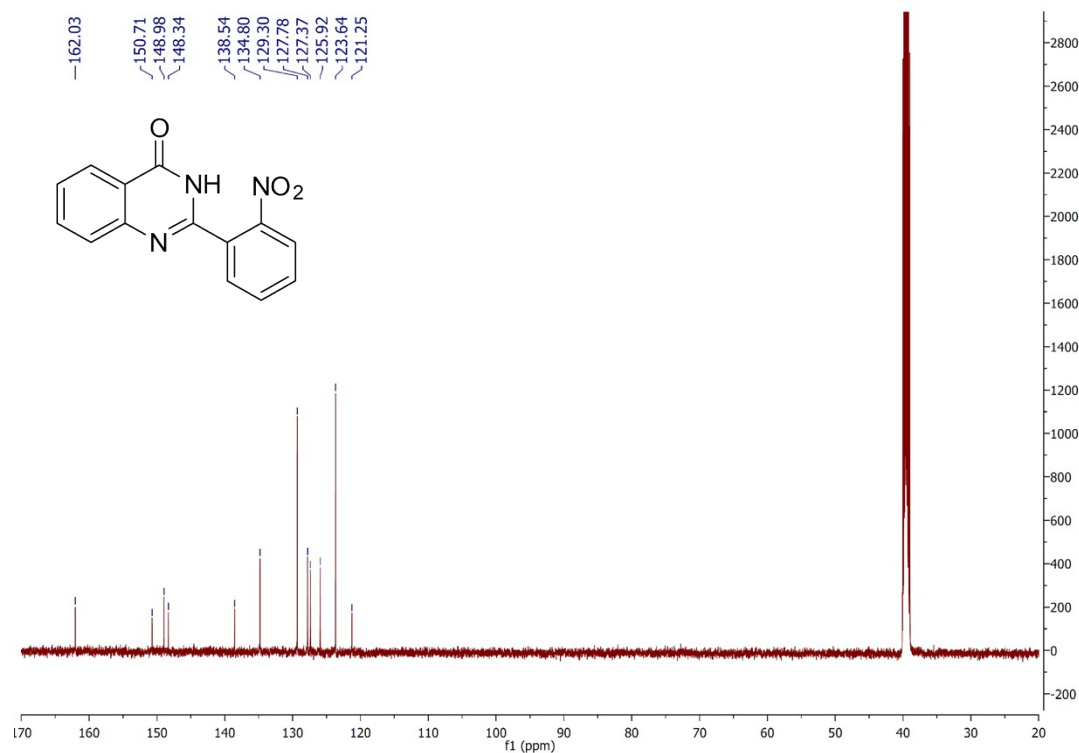

## 2-(4-Bromophenyl)quinazolin-4(3H)-one (3ma)

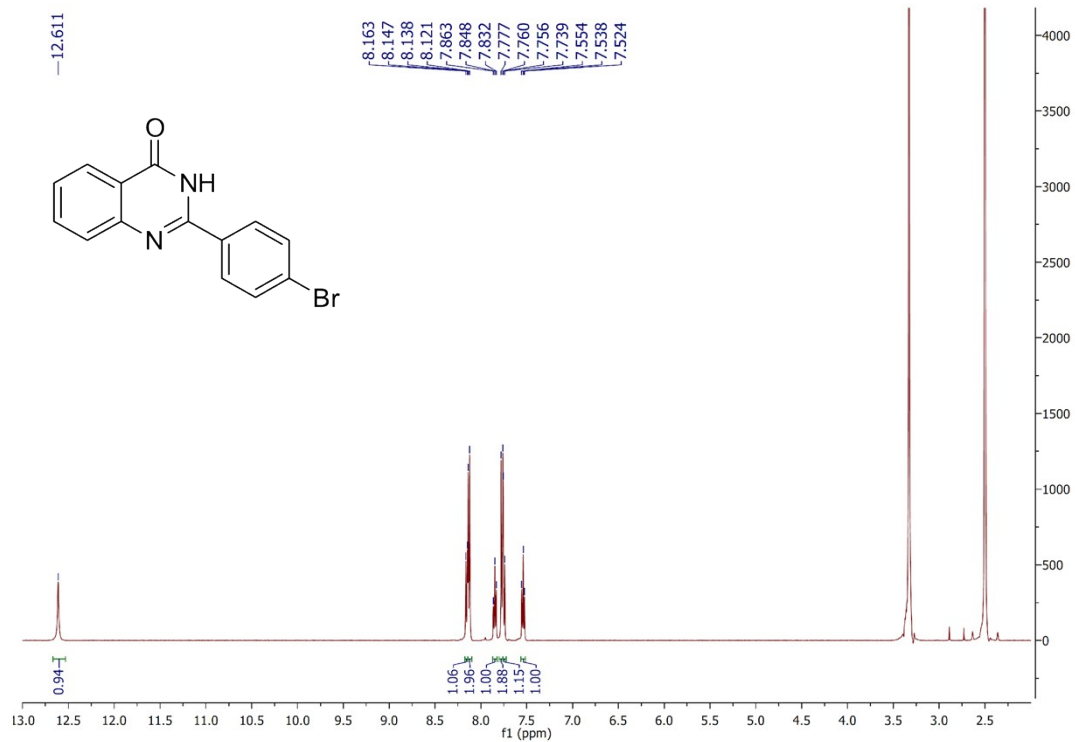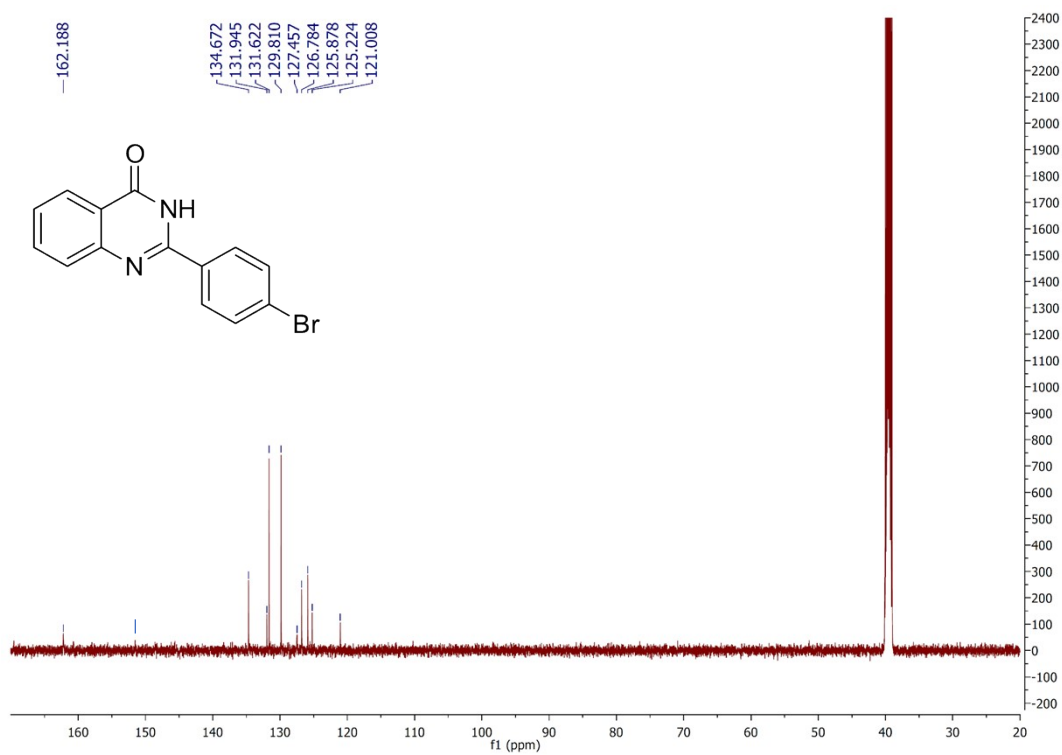

## 2-(3,4-Dimethoxyphenyl)quinazolin-4(3H)-one (3na)

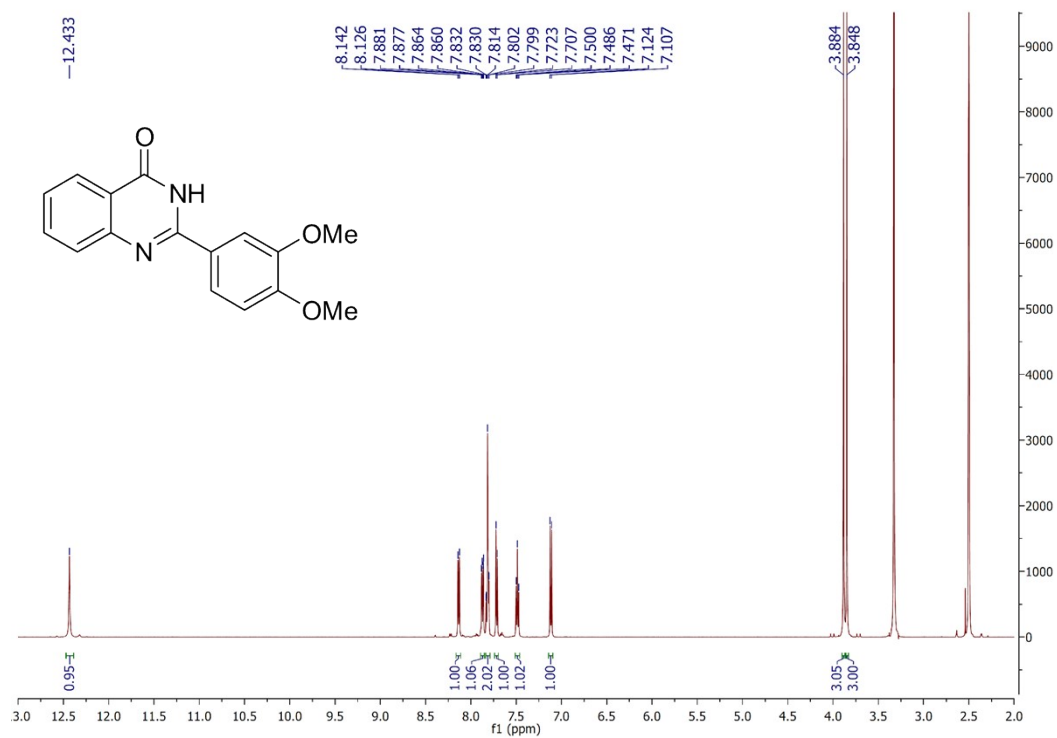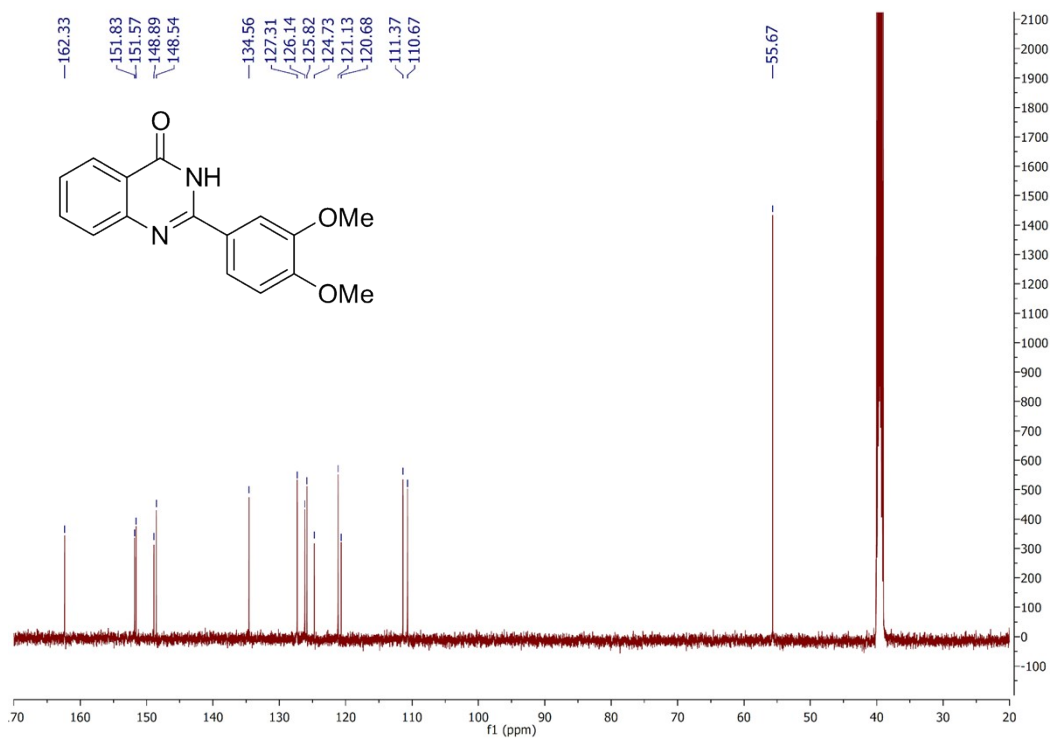

# 6-Chloro-2-phenylquinazolin-4(3H)-one (30a)

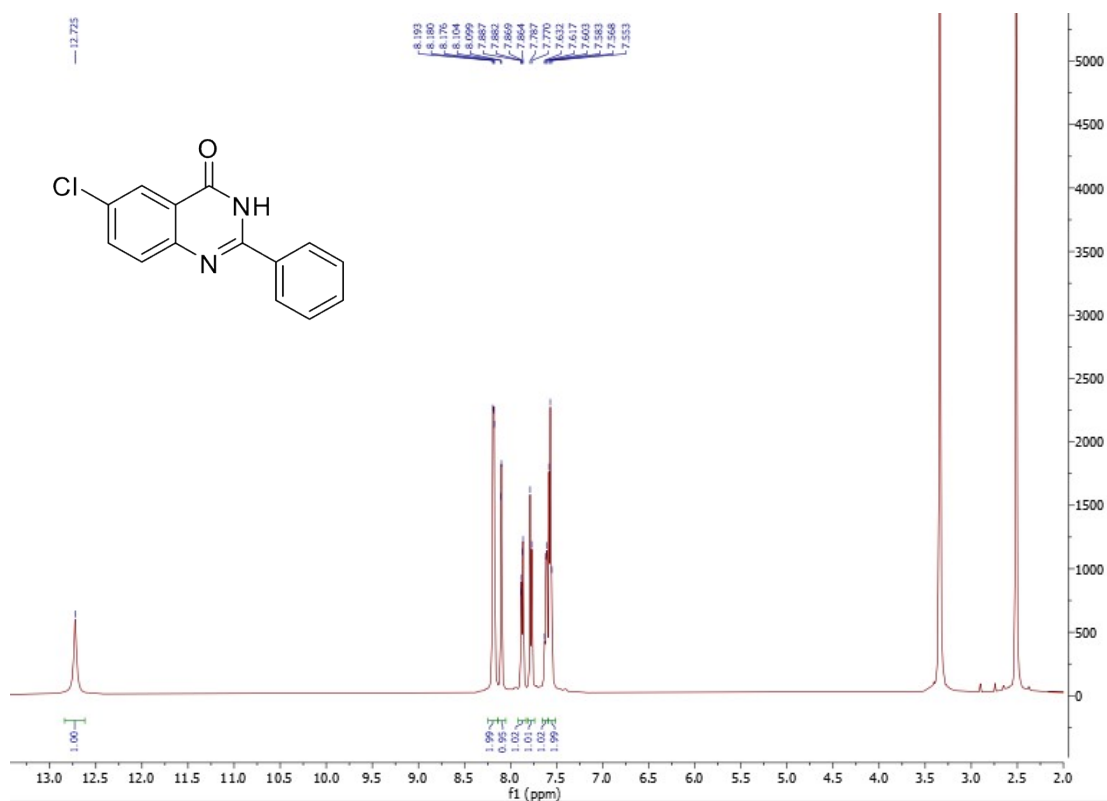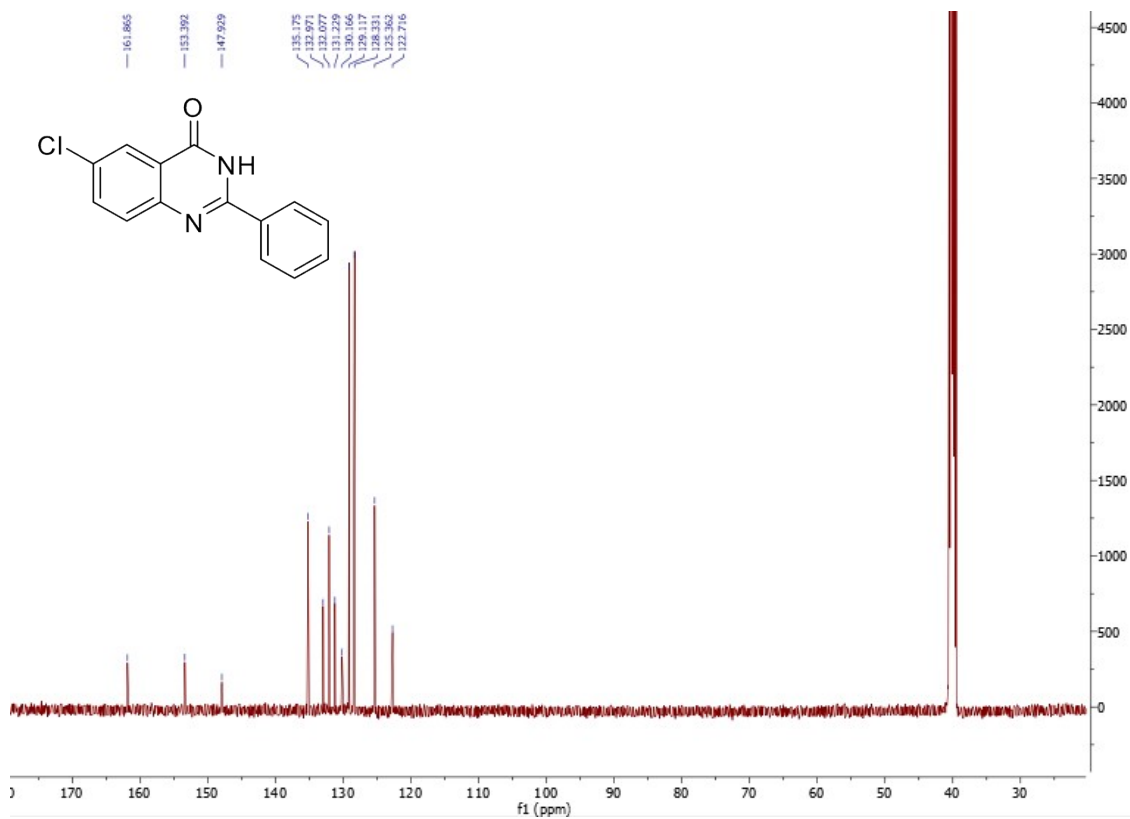

# 6-Fluoro-2-phenylquinazolin-4(3H)-one (3pa)

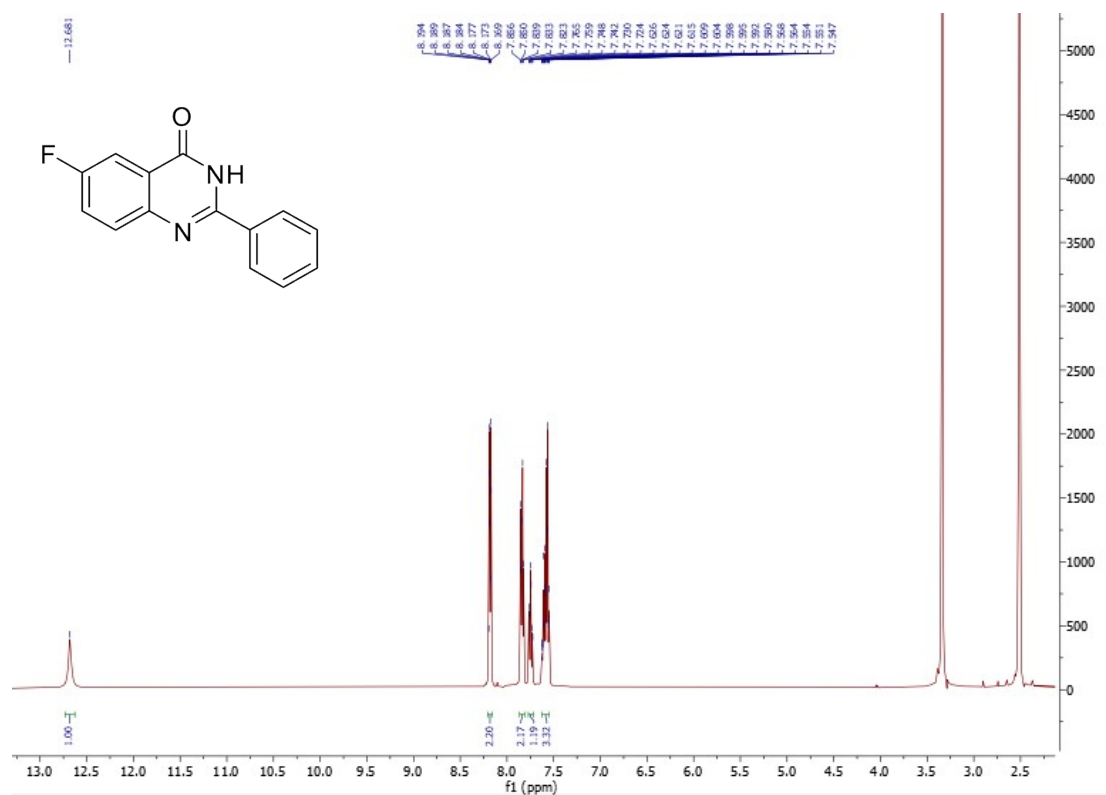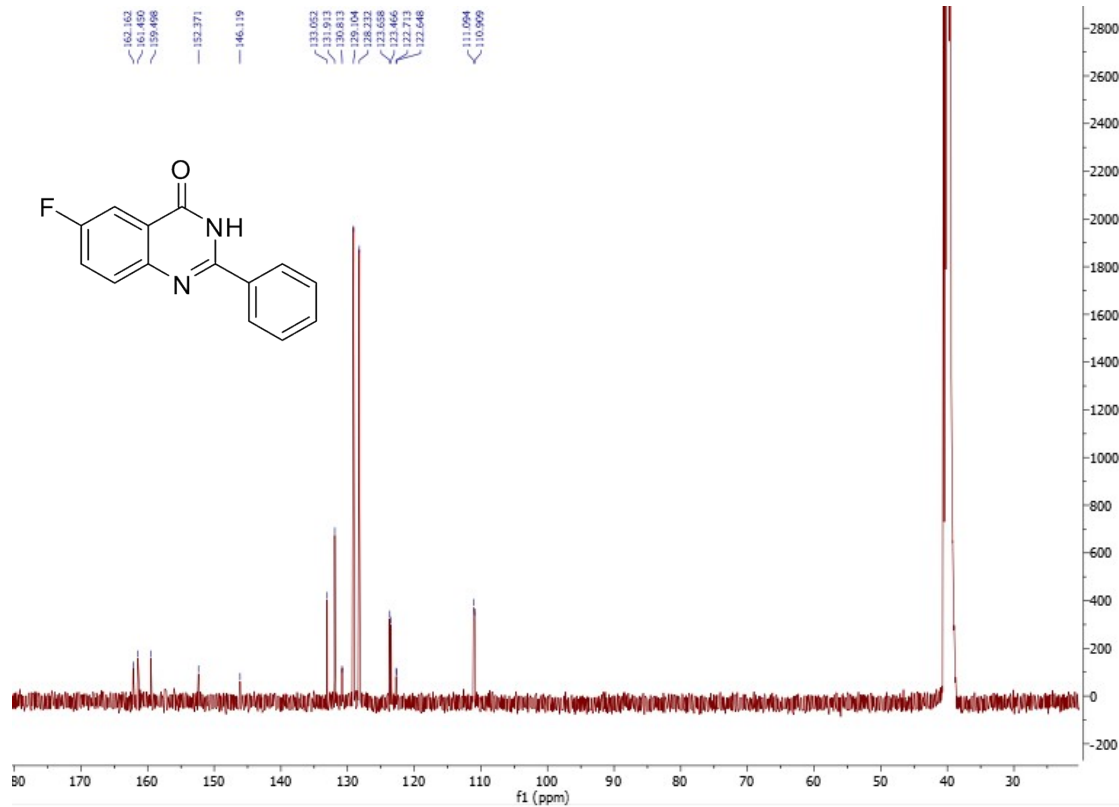

## 2-(Pyridin-2-yl)quinazolin-4(3H)-one (3qa)

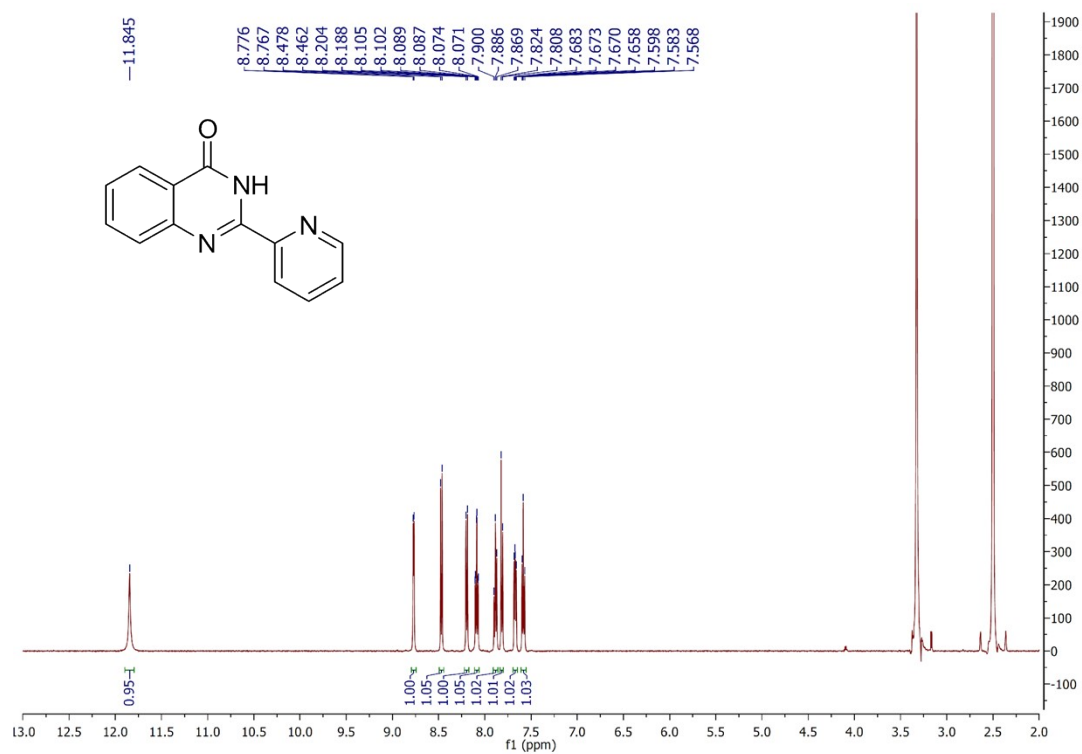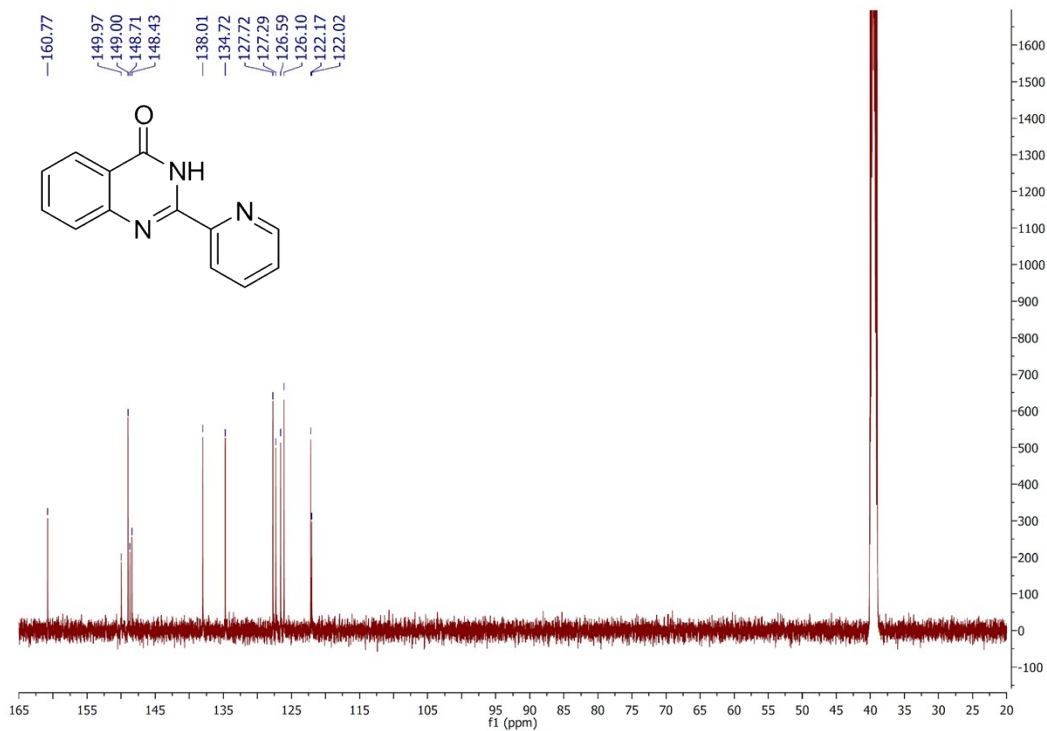



## 2-(Pyridin-3-yl)quinazolin-4(3H)-one (3ra)

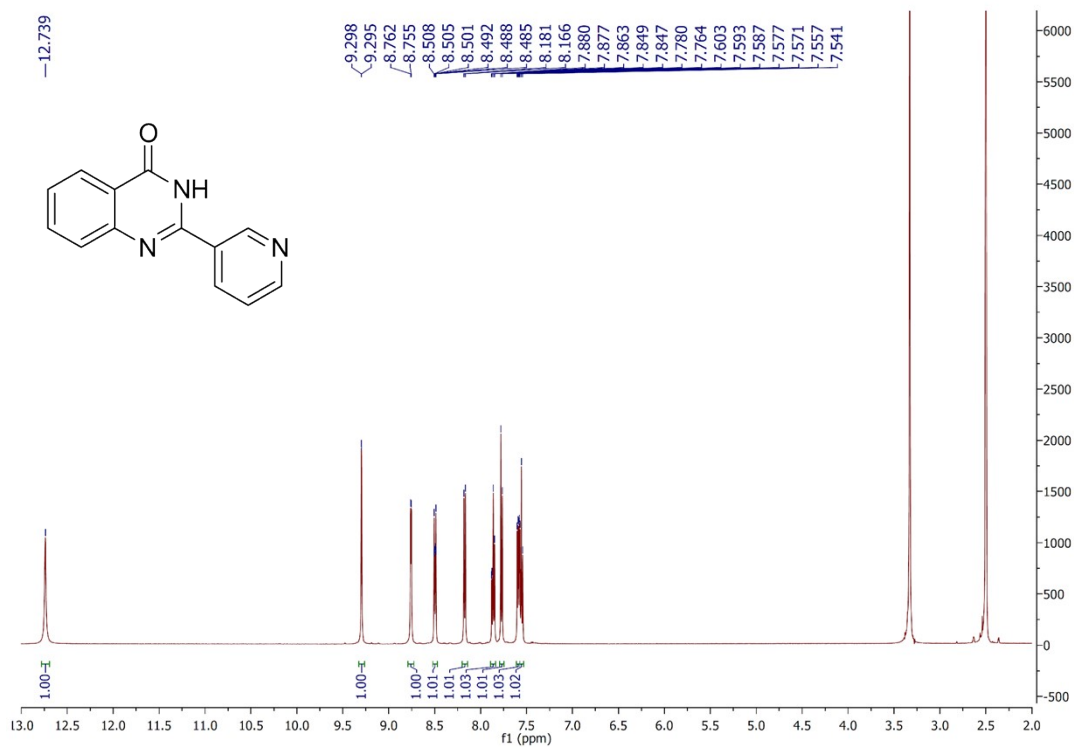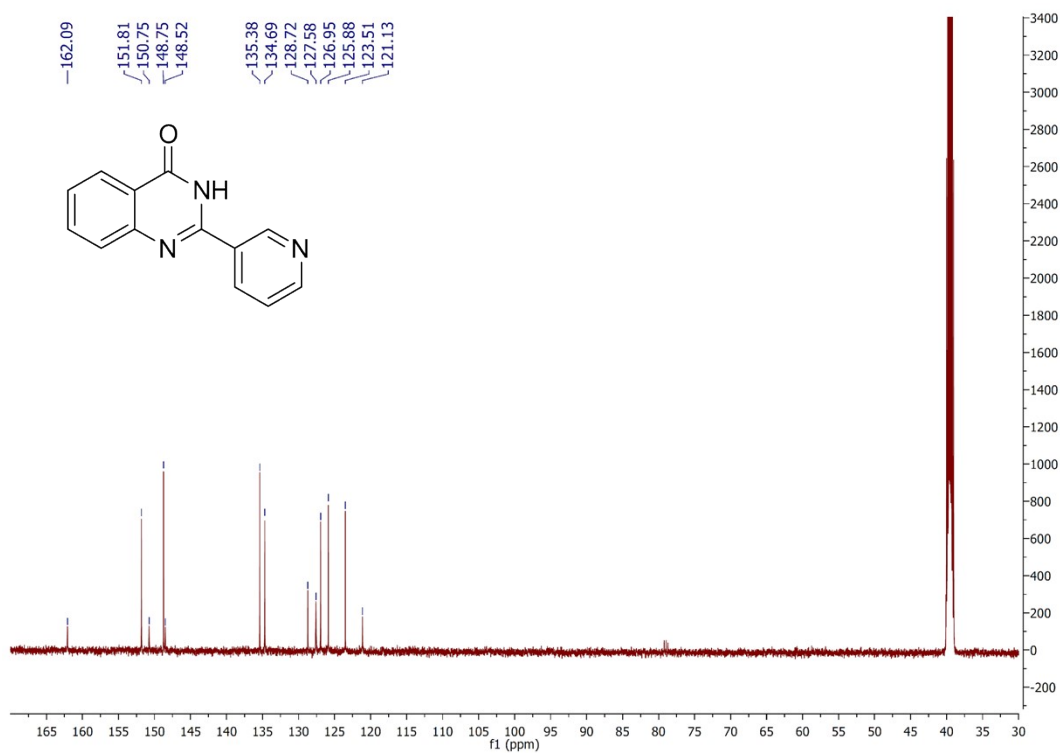

## 2-(Pyridin-4-yl)quinazolin-4(3H)-one (3sa)

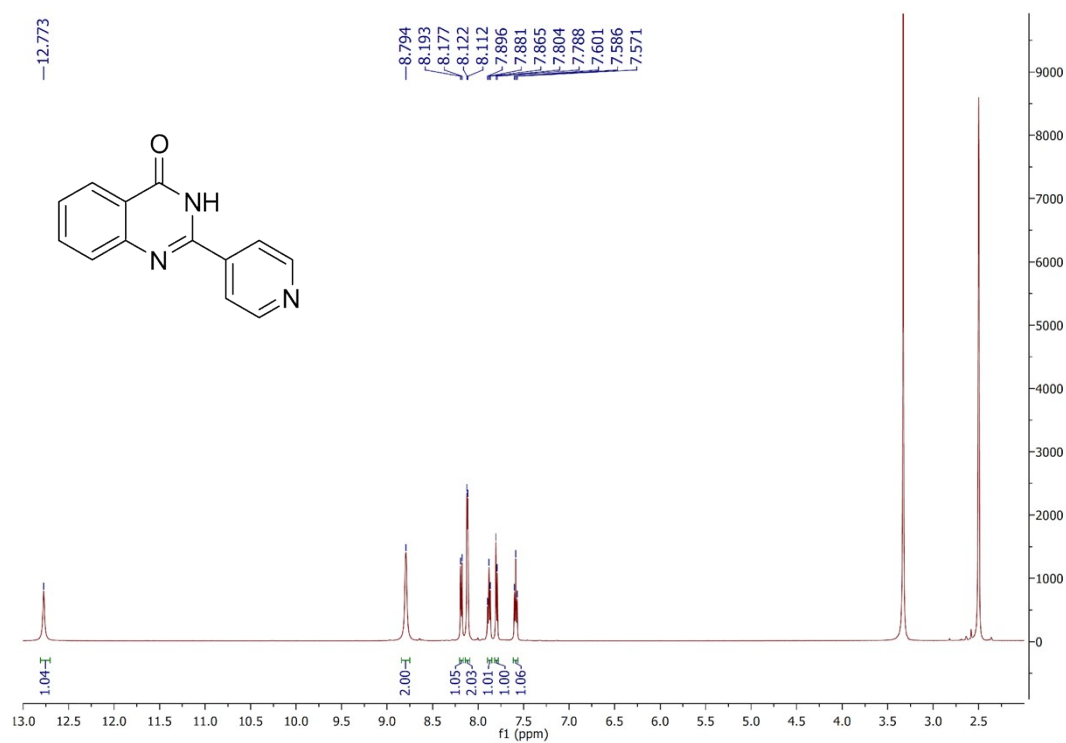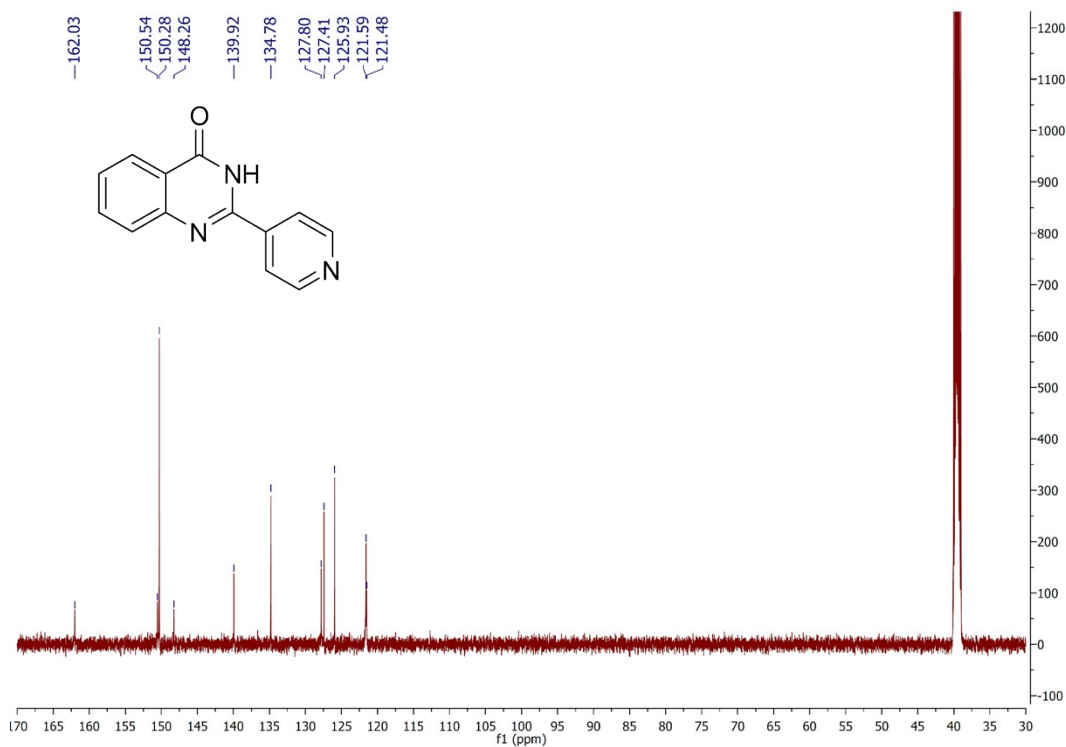

## 2-(2-Thiophen)quinazolin-4(3H)-one (3ta)

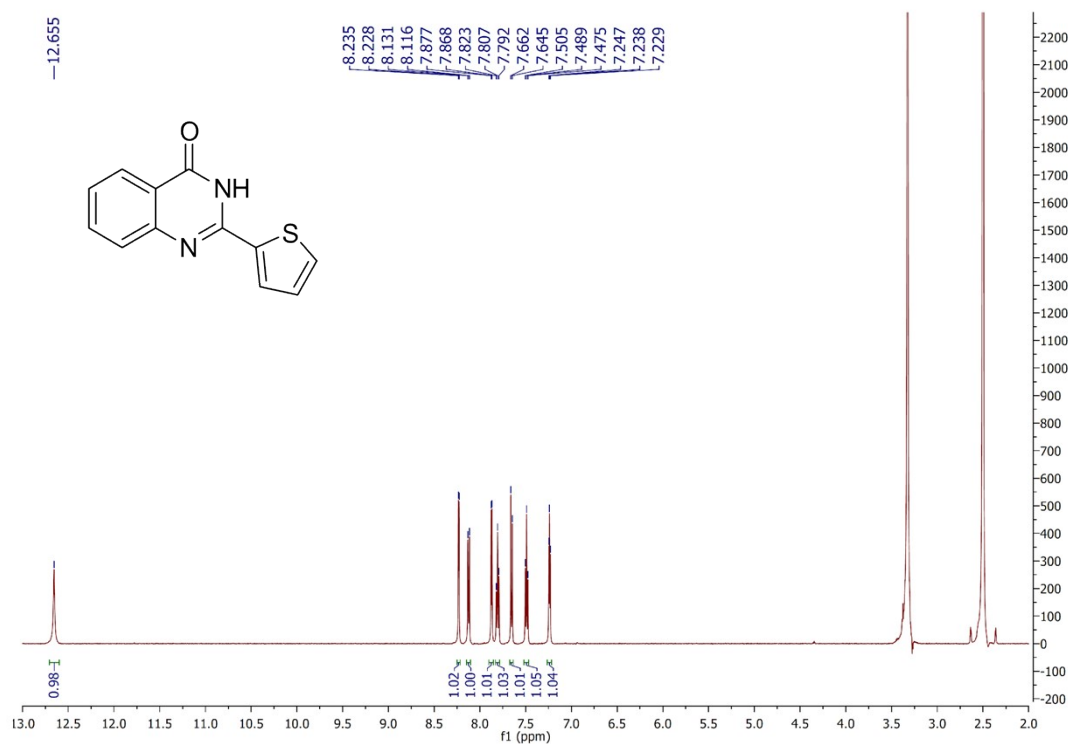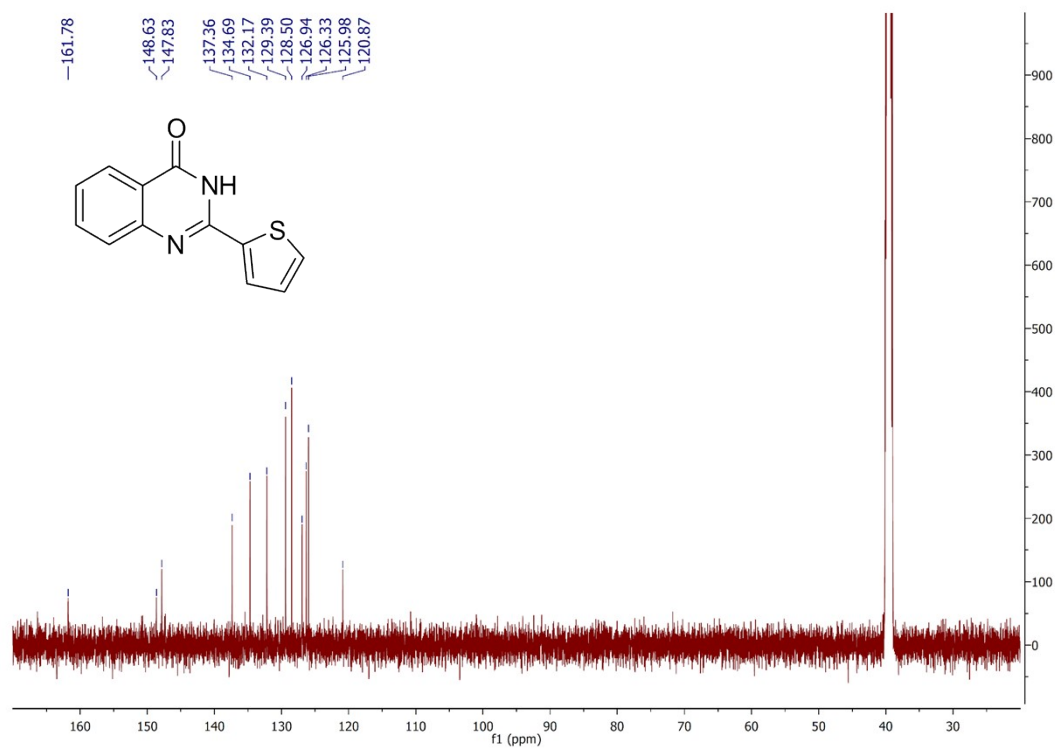

## 2-(3-Thiophen)quinazolin-4(3H)-one (3ua)

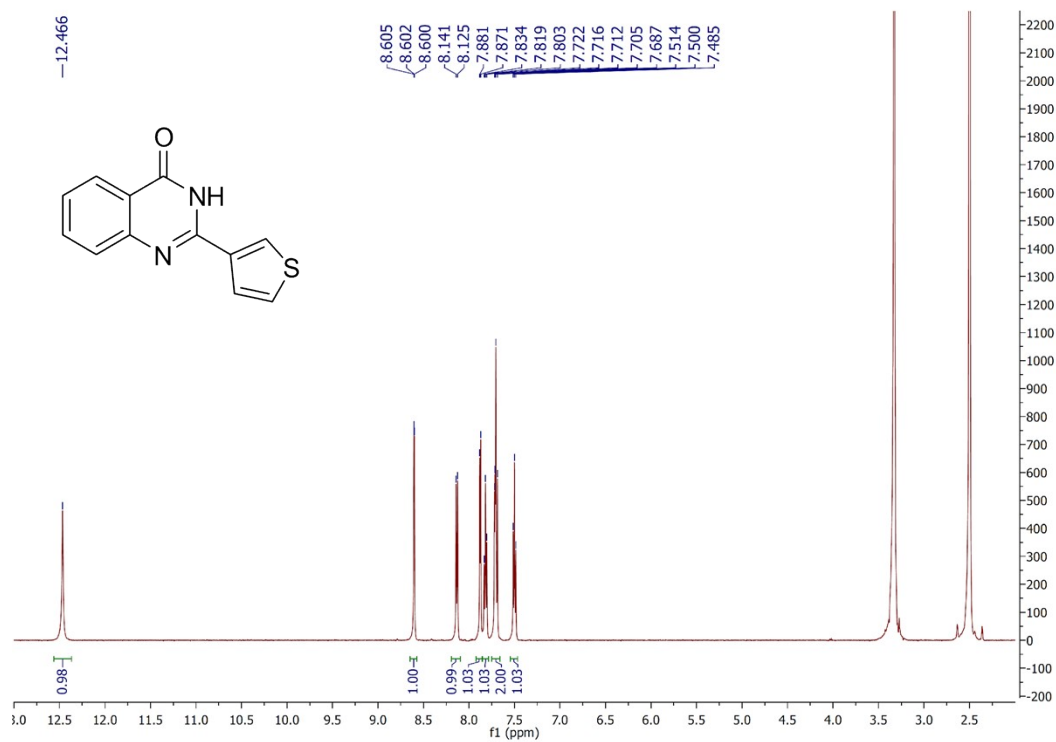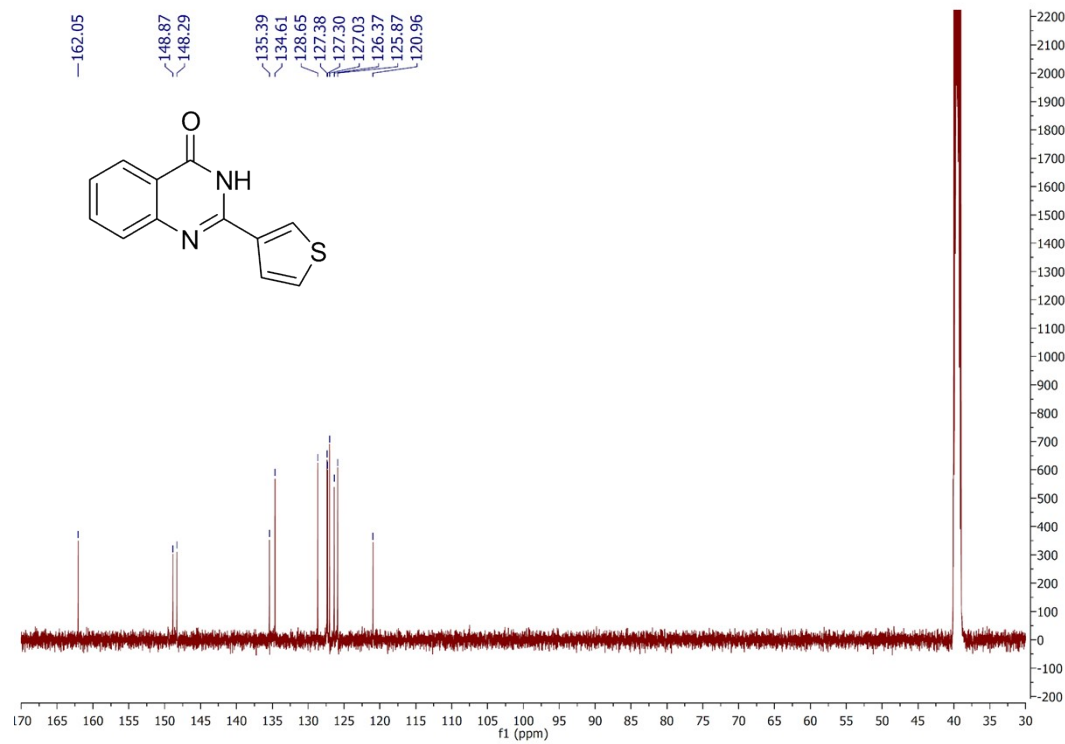

### 3-Benzyl-2-phenylquinazolin-4(3H)-one (3ab)

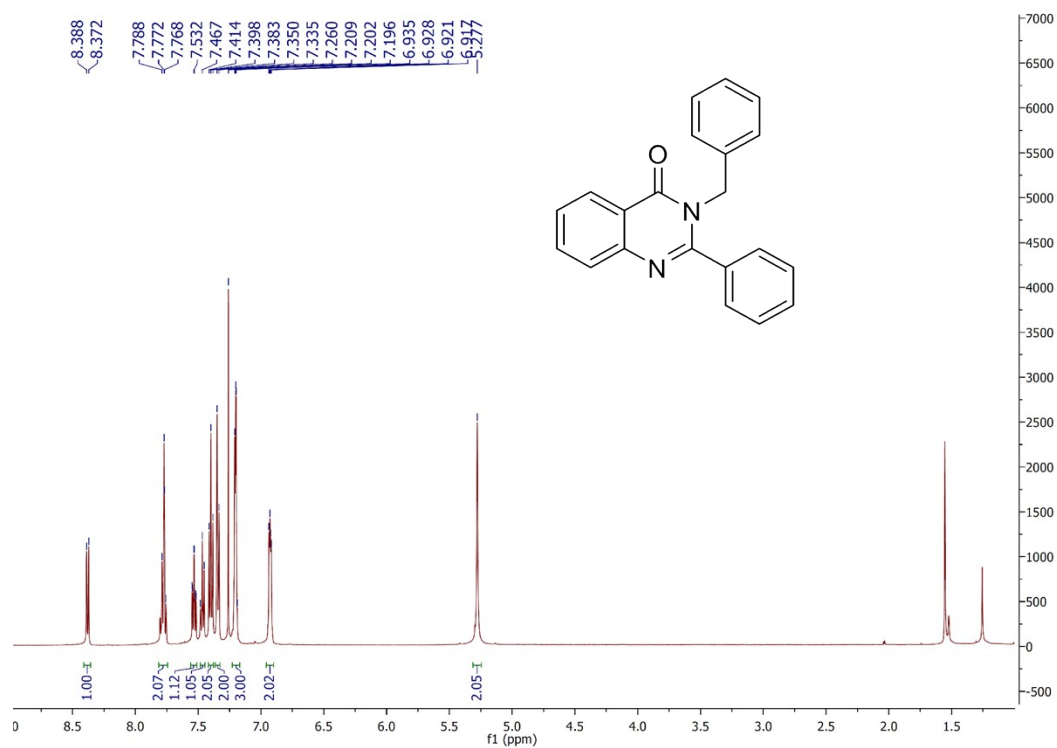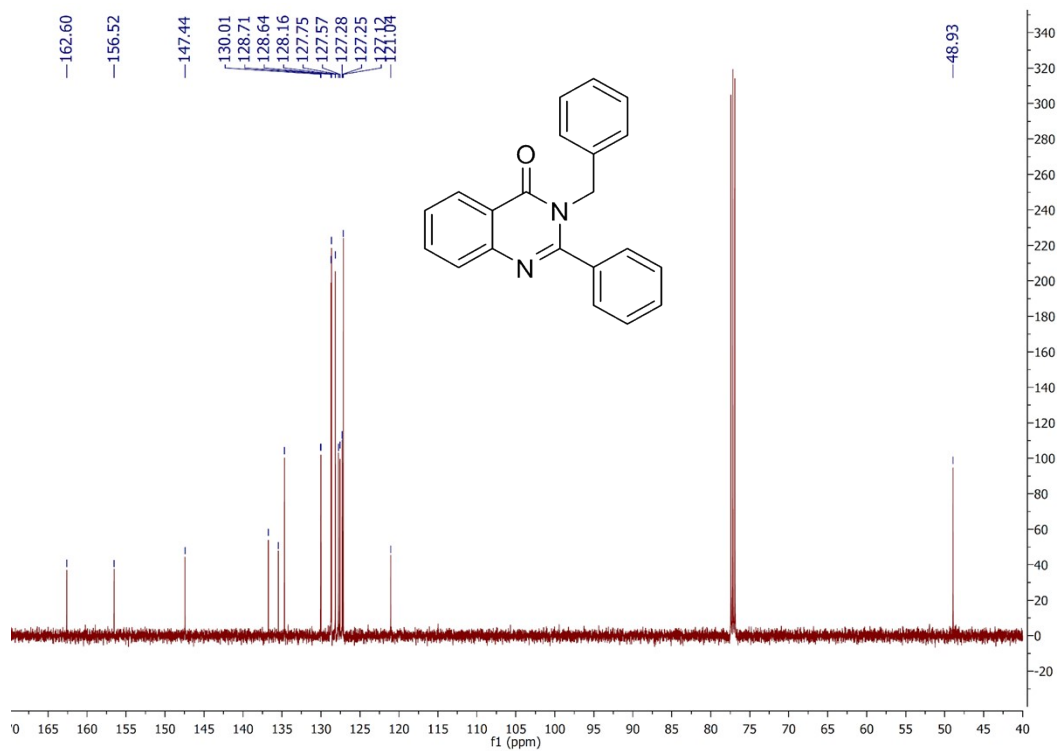

### 3-(2-Methoxybenzyl)-2-phenylquinazolin-4(3H)-one (3ac)

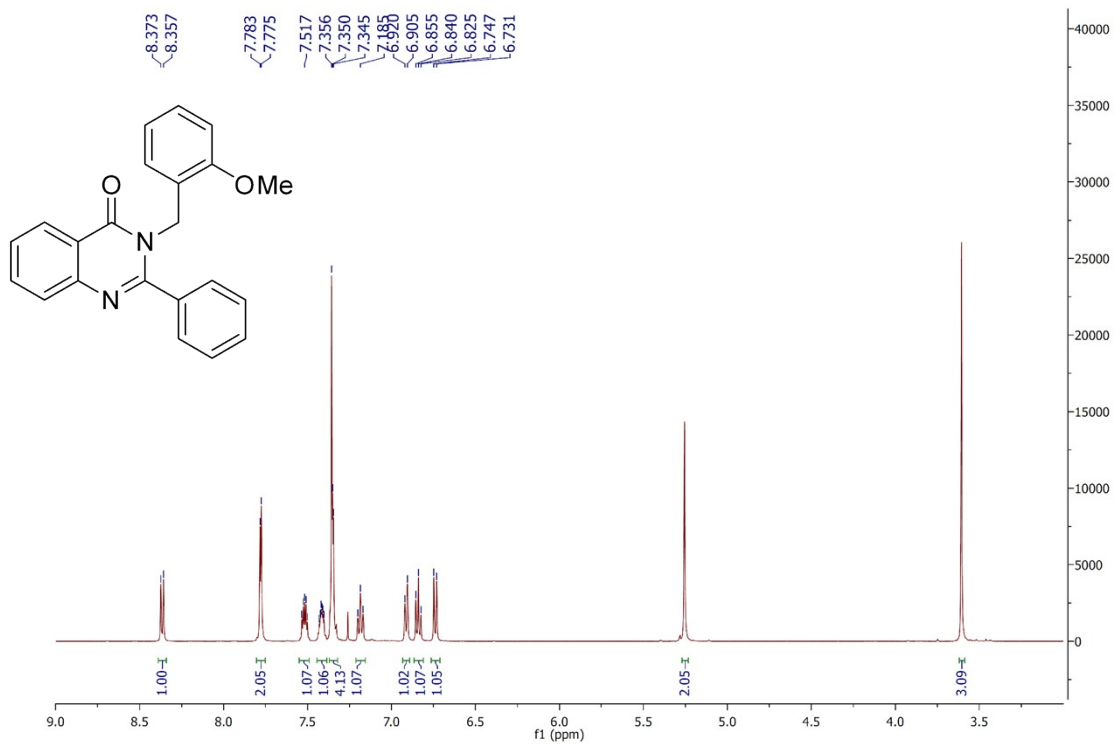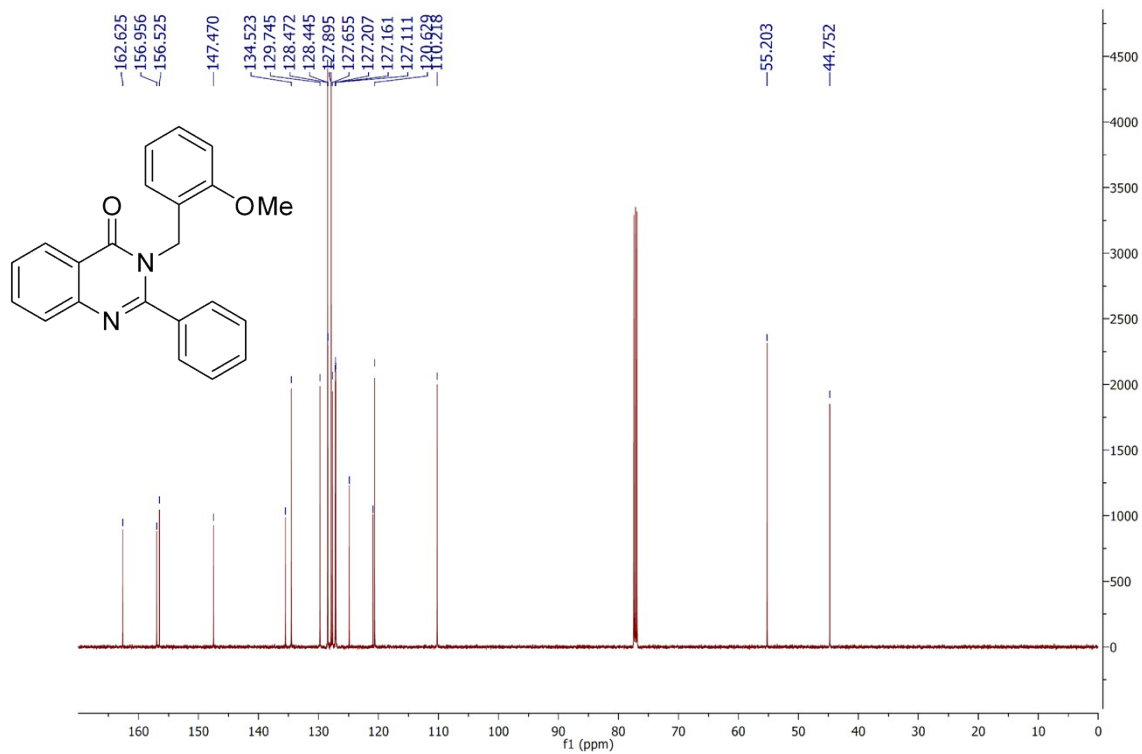

### 3-(3-Methoxybenzyl)-2-phenylquinazolin-4(3H)-one (3ad)

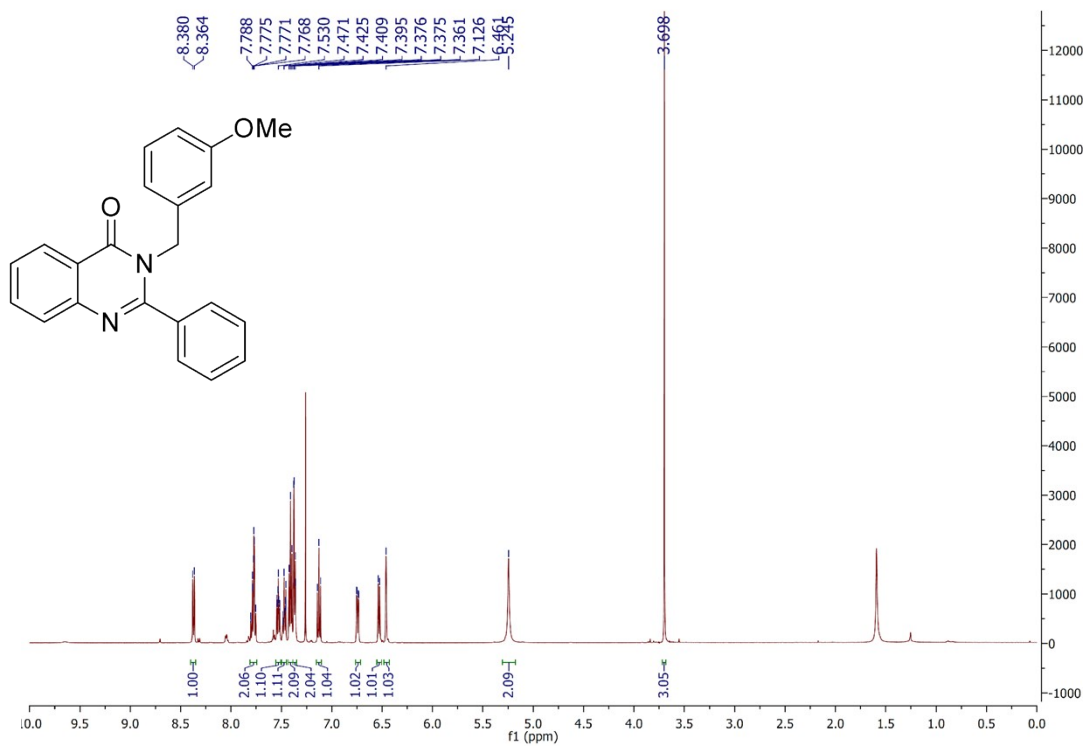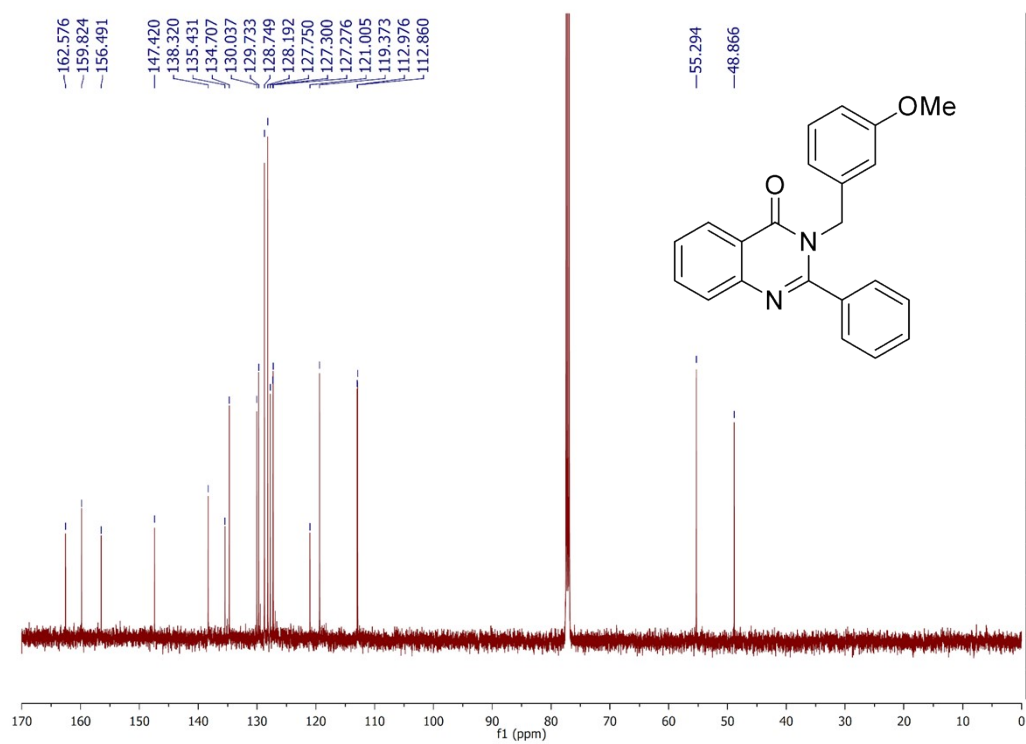

### 3-(4-Methoxybenzyl)-2-phenylquinazolin-4(3H)-one (3ae)

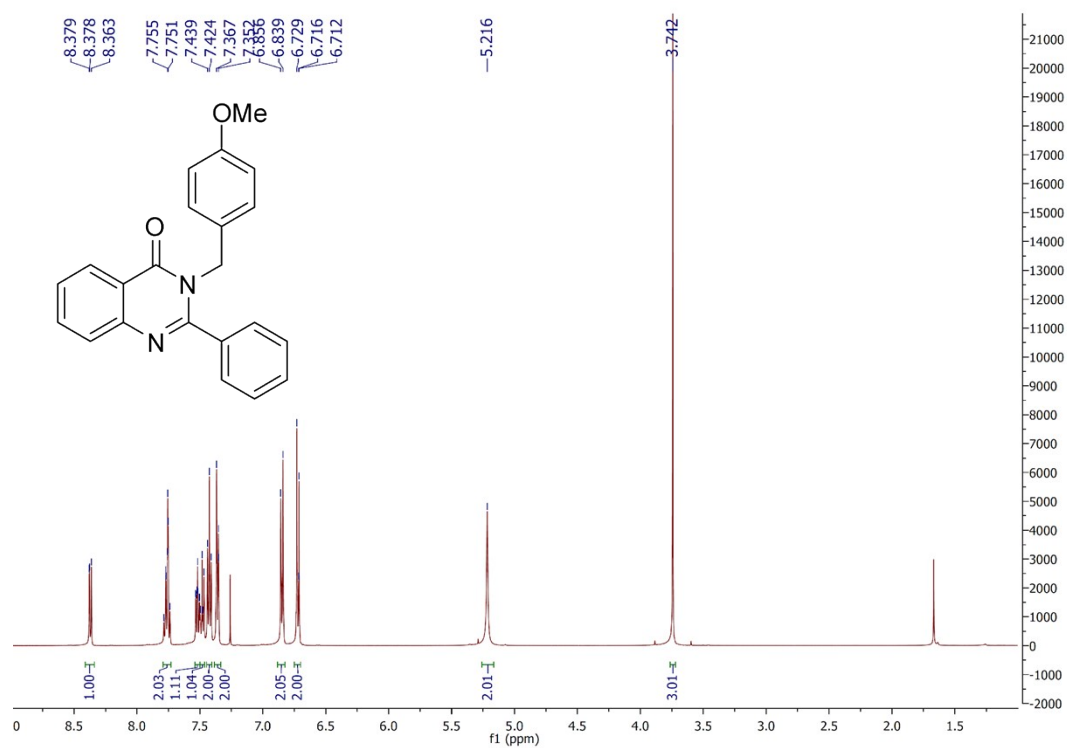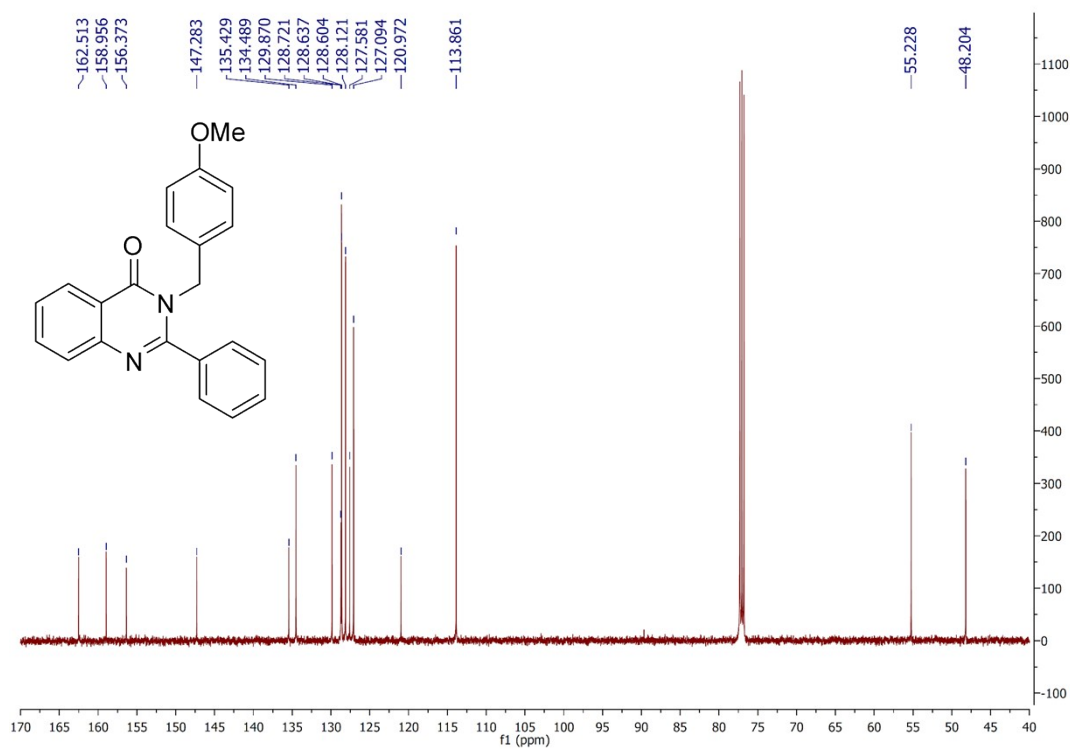



### 3-(2-Chlorobenzyl)-2-phenylquinazolin-4(3*H*)-one (3af)

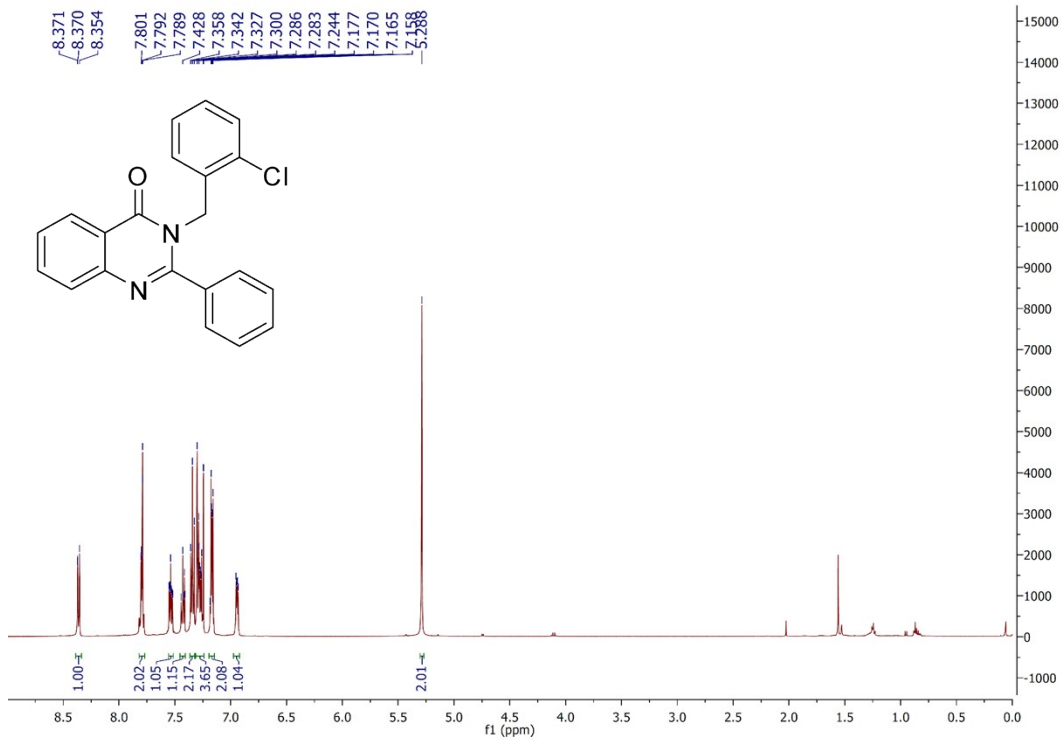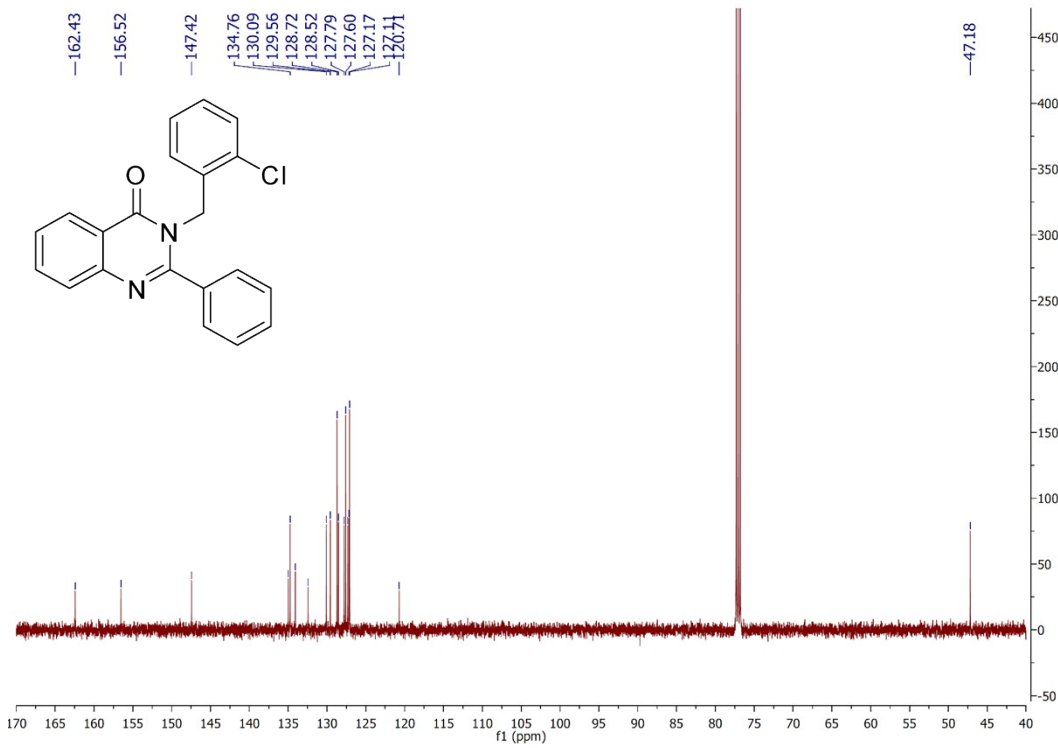

### 3-(4-Chlorobenzyl)-2-phenylquinazolin-4(3H)-one (3ag)

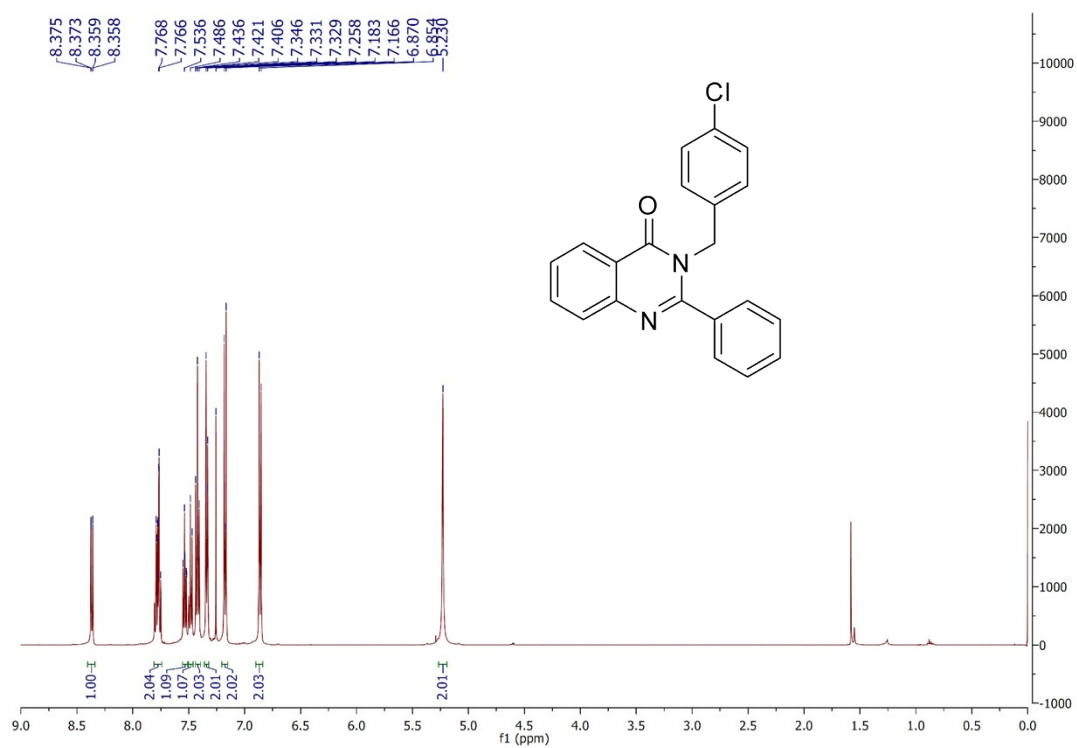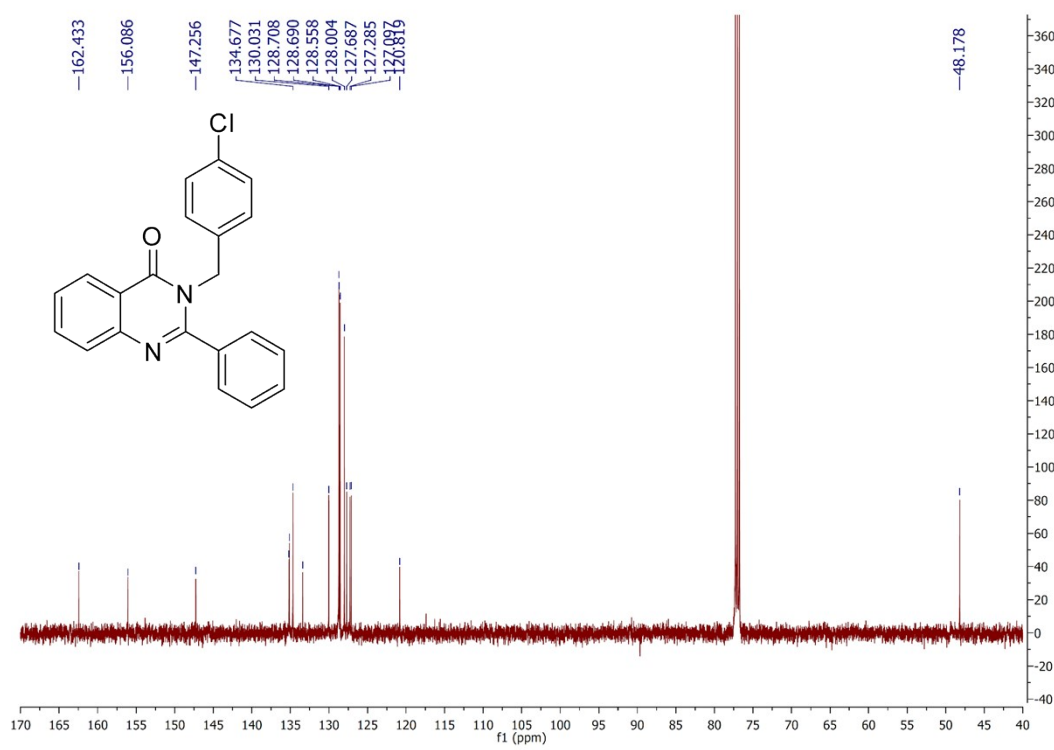

**3-(3-Trifluoromethylbenzyl)-2-phenylquinazolin-4(3H)-one (3ah)**

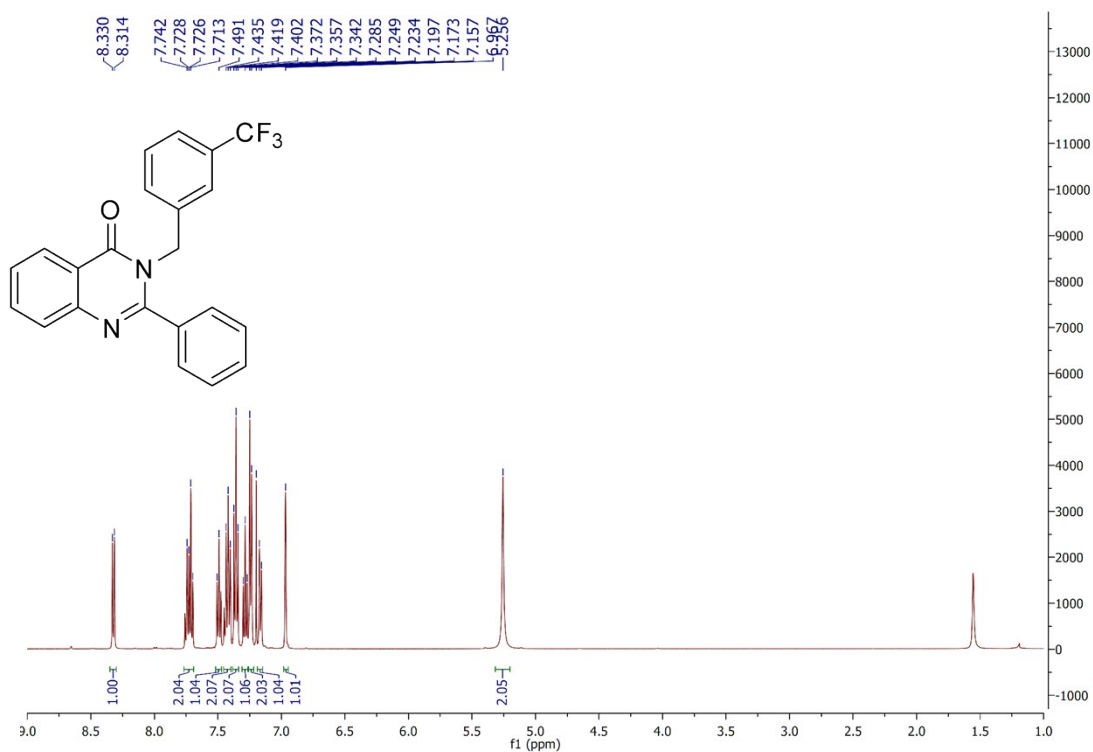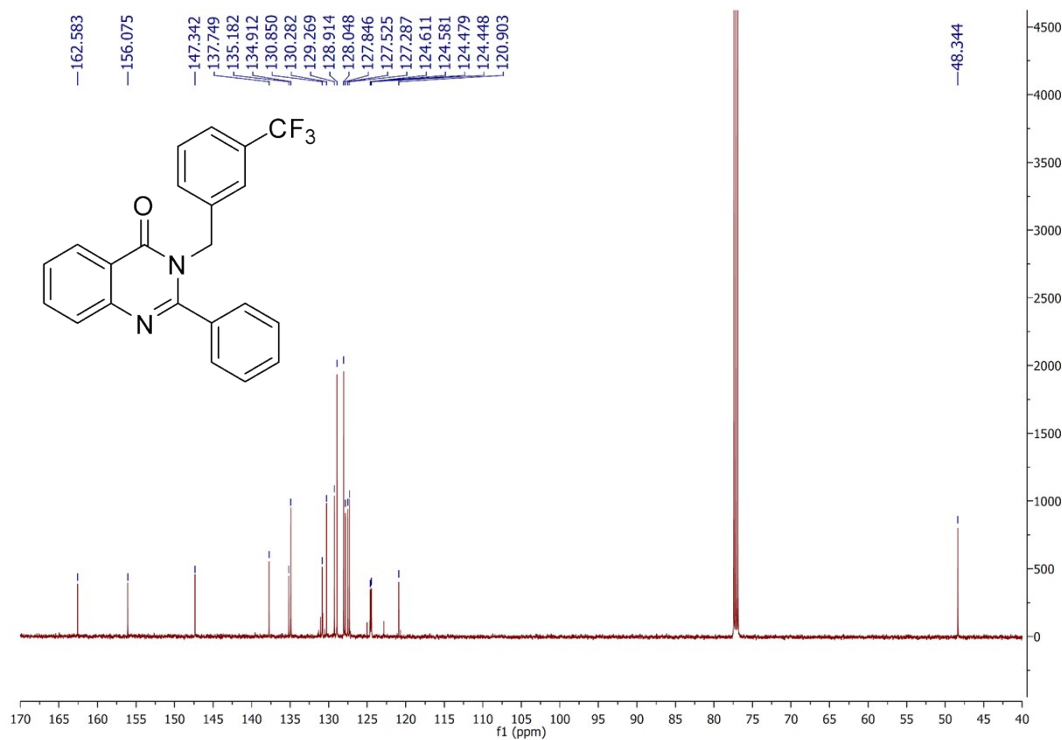

### 3-Phenylethyl-2-phenylquinazolin-4(3*H*)-one (3ai)

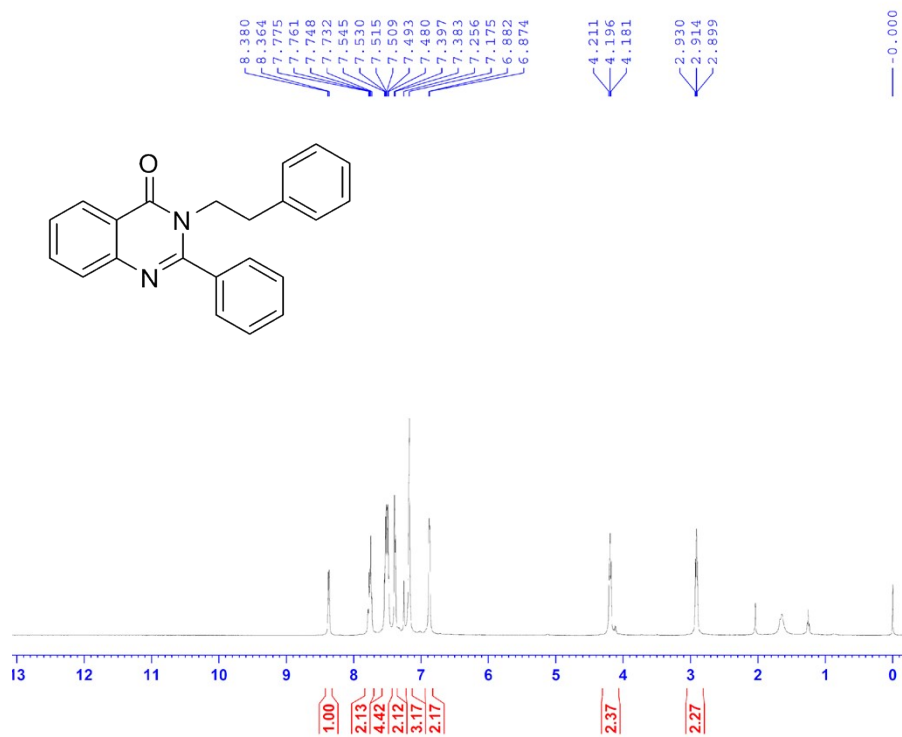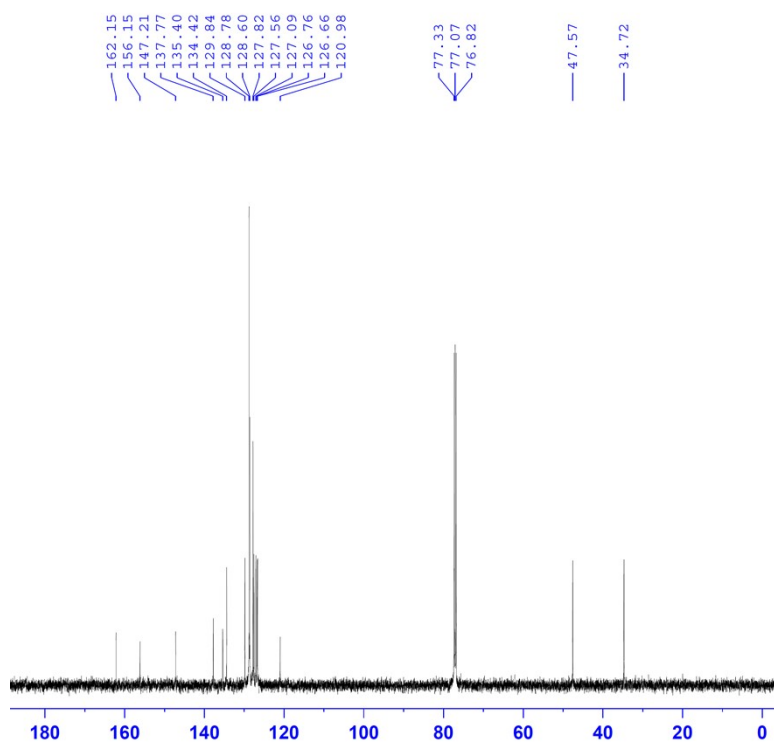

### 3-(2-Methylphenylethyl)-2-phenylquinazolin-4(3H)-one (3aj)

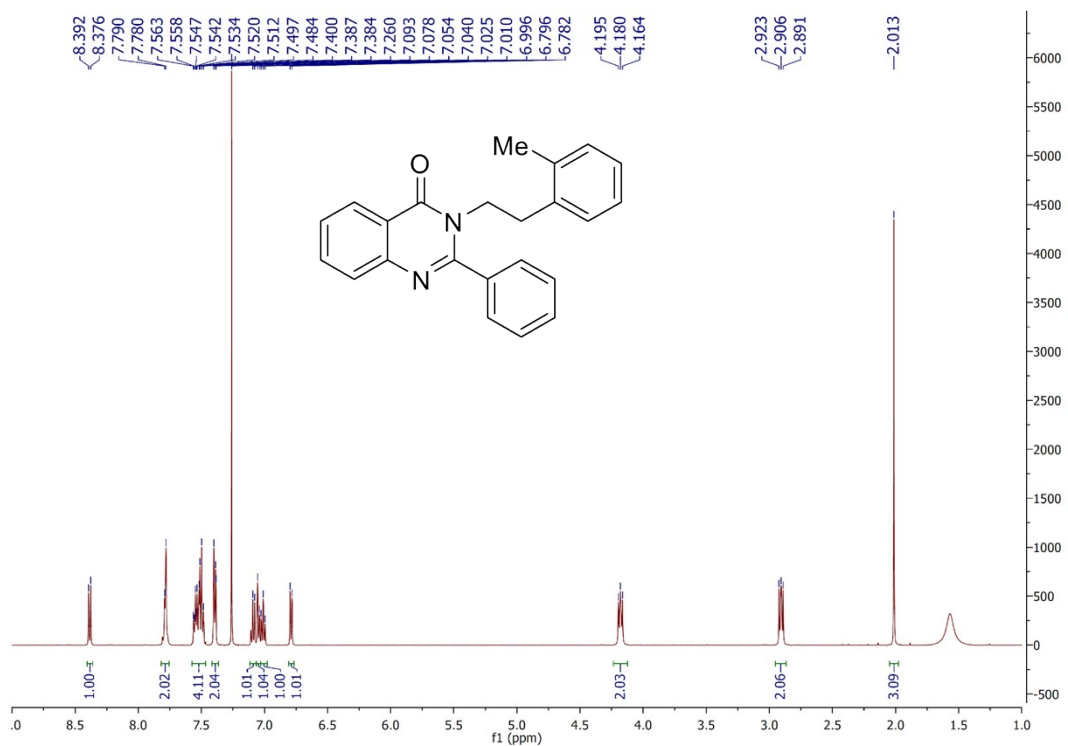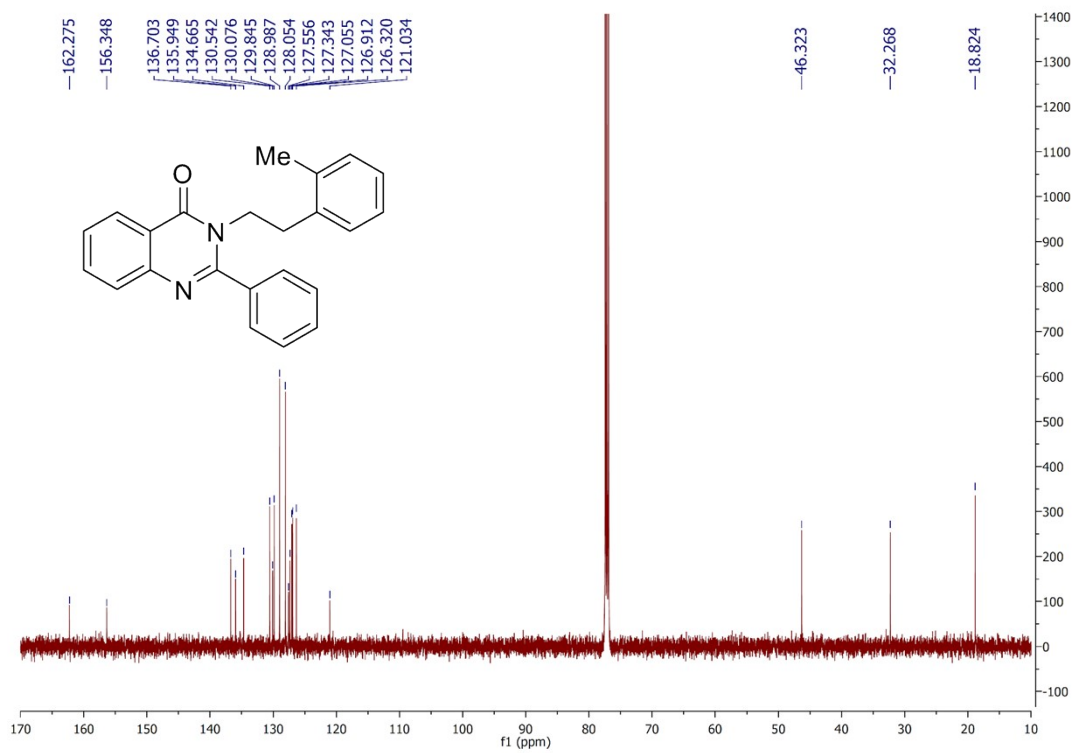

### 3-(3-Methylphenylethyl)-2-phenylquinazolin-4(3H)-one (3ak)

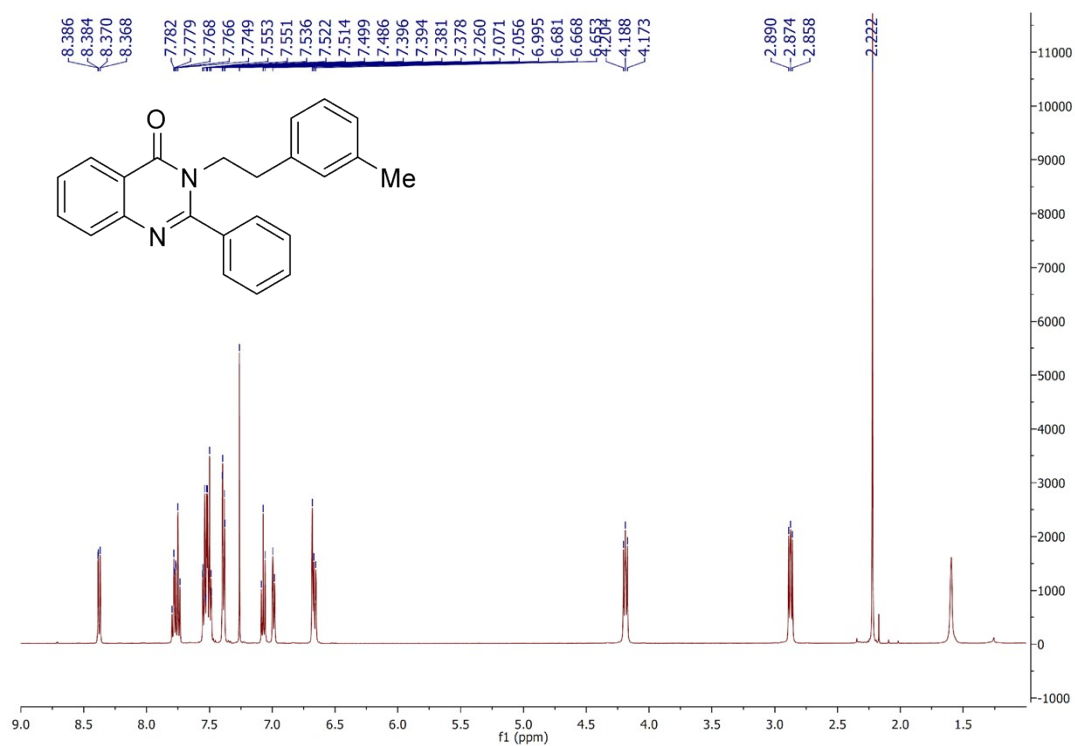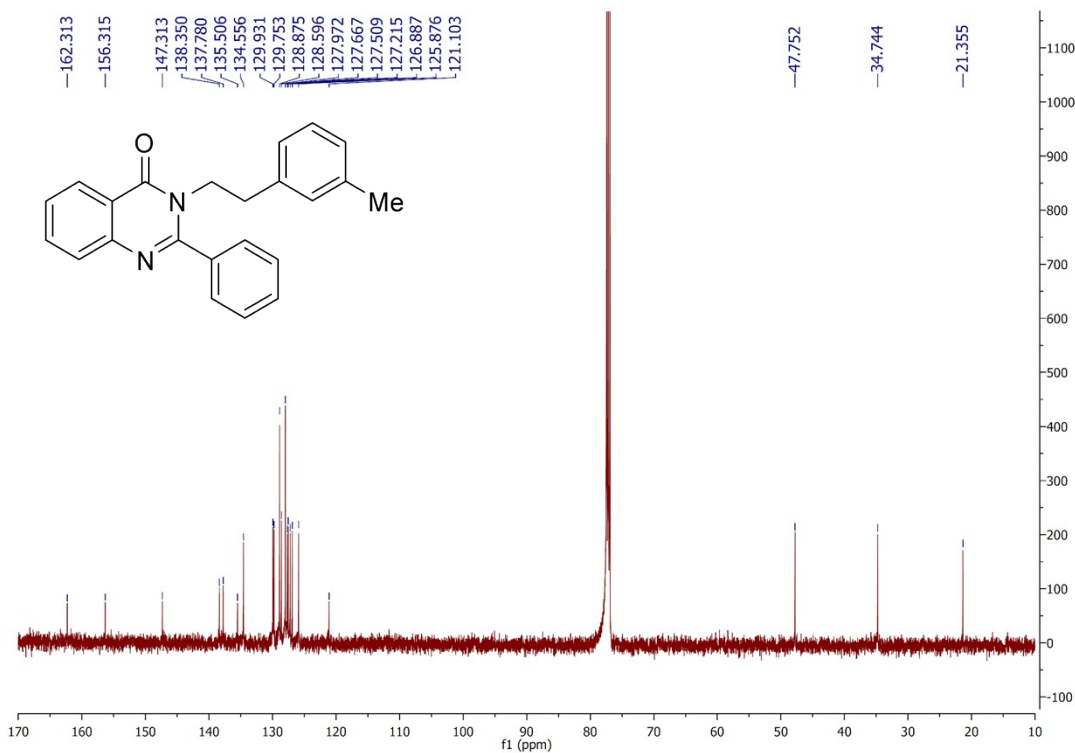

### 3-(2-Methoxyphenylethyl)-2-phenylquinazolin-4(3*H*)-one (3a)

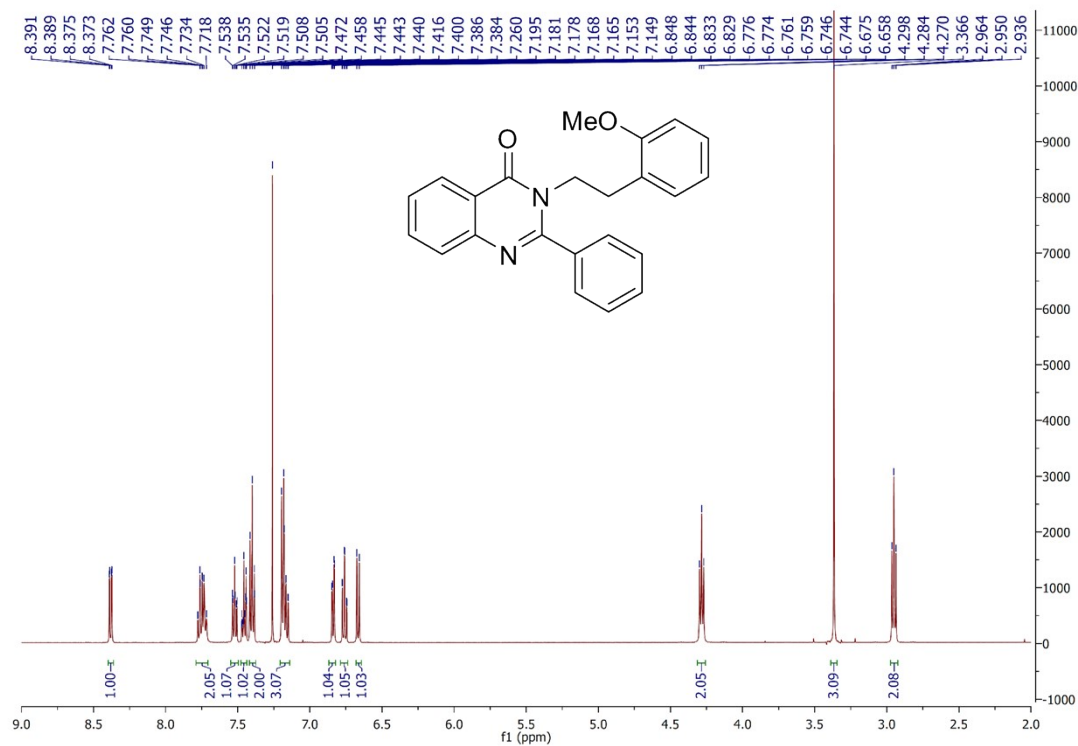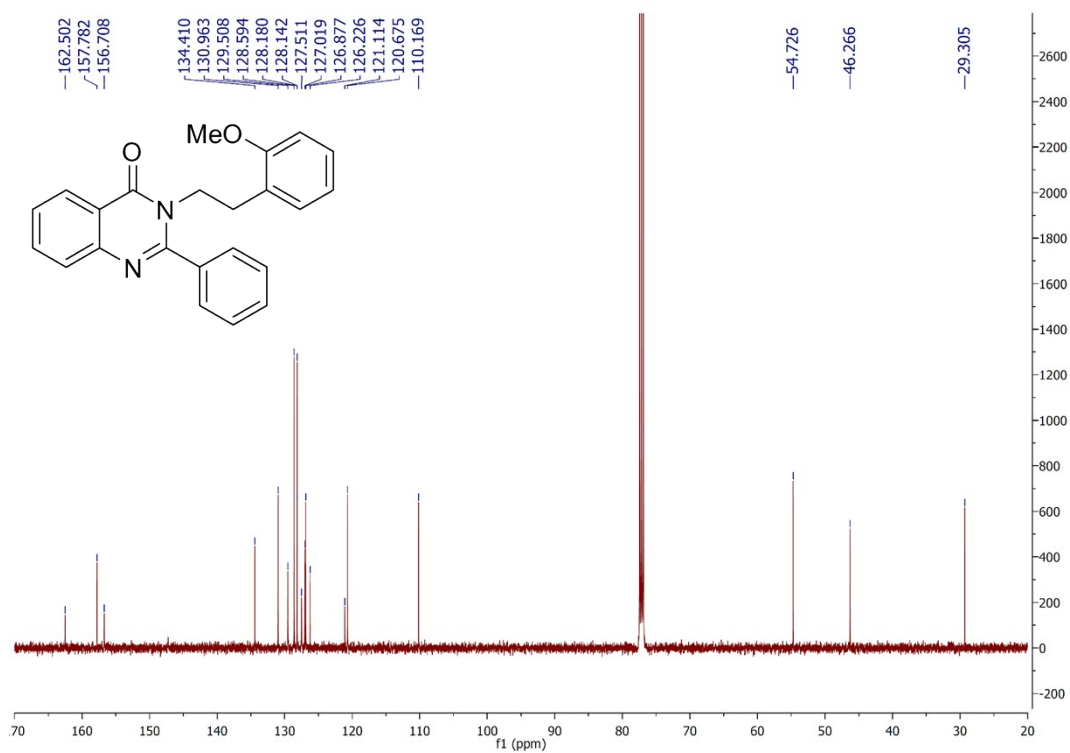

**3-(3-Phenyl-1-propyl)-2-phenylquinazolin-4(3H)-one (3am)**

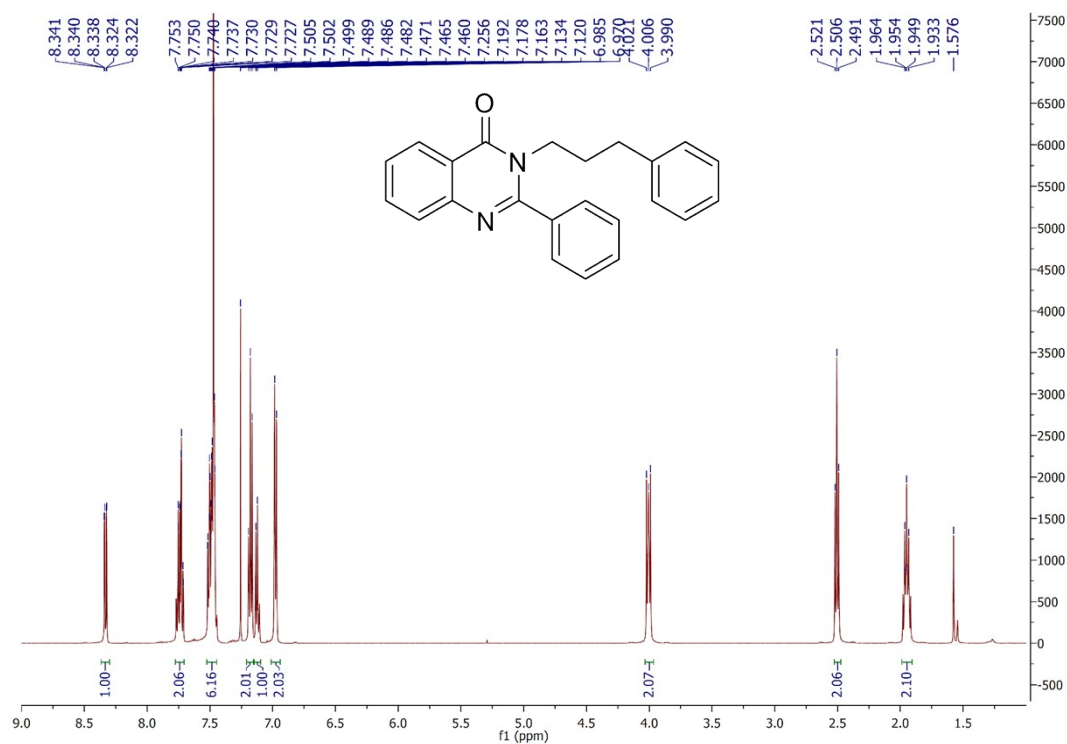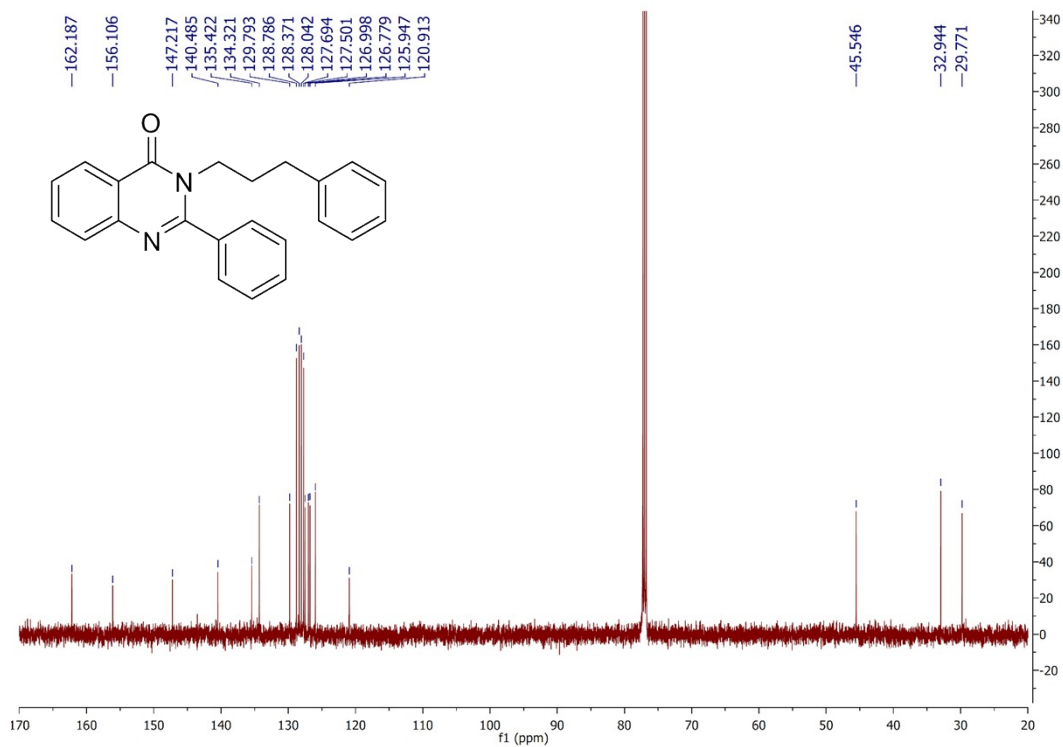



## 2,3-Diphenylquinazolin-4(3H)-one (3an)

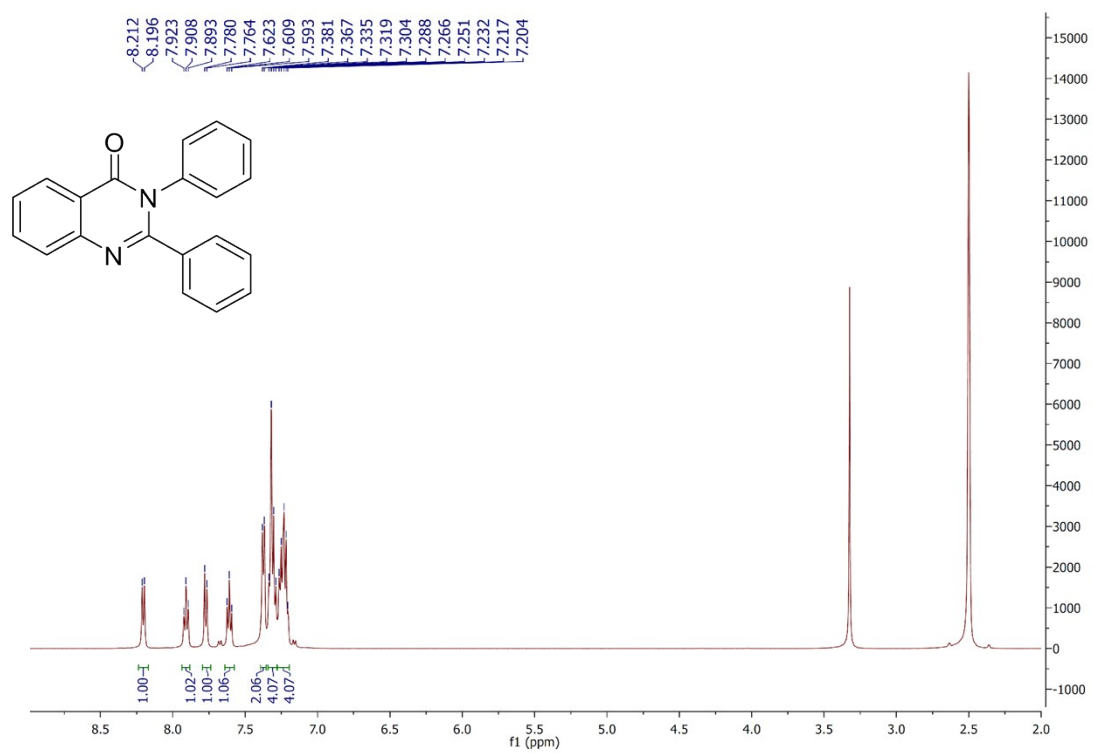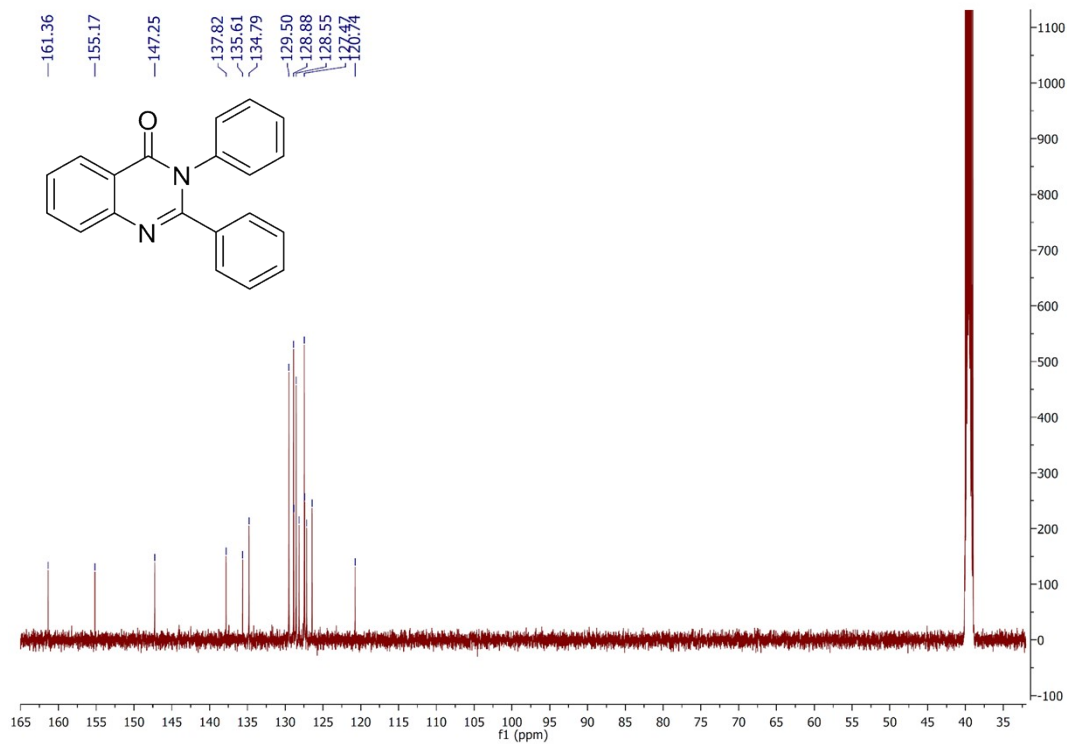

### 3-(4-Bromophenyl)-2-phenylquinazolin-4(3H)-one (3ao)

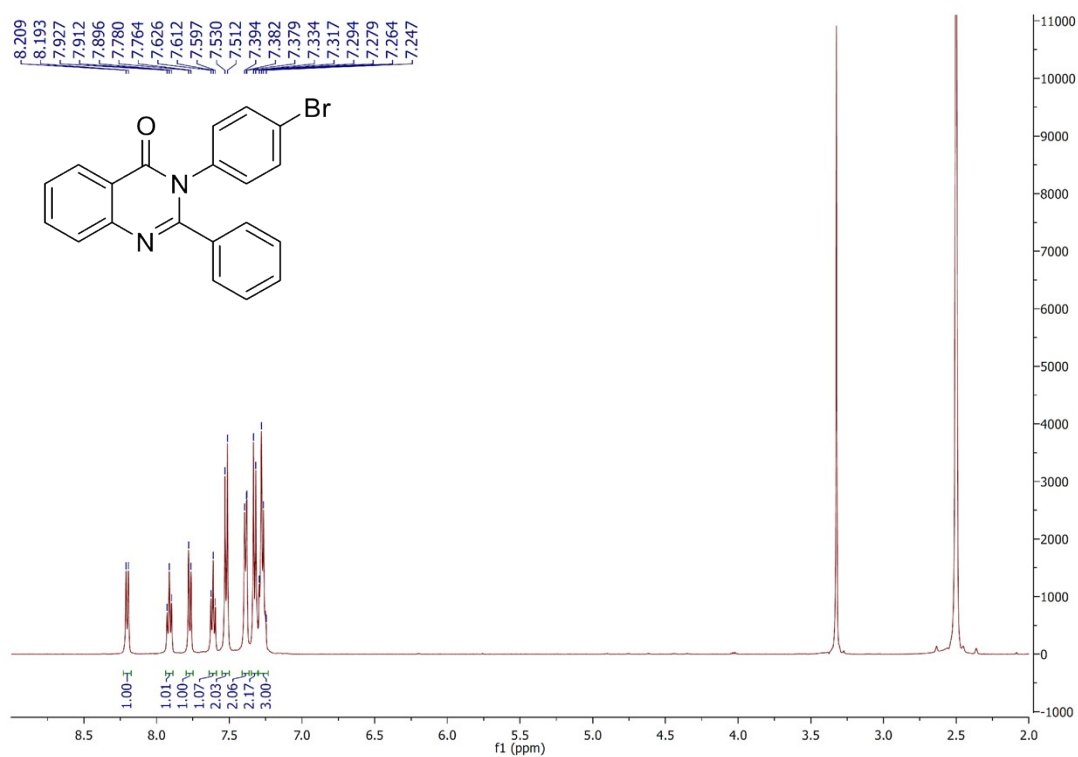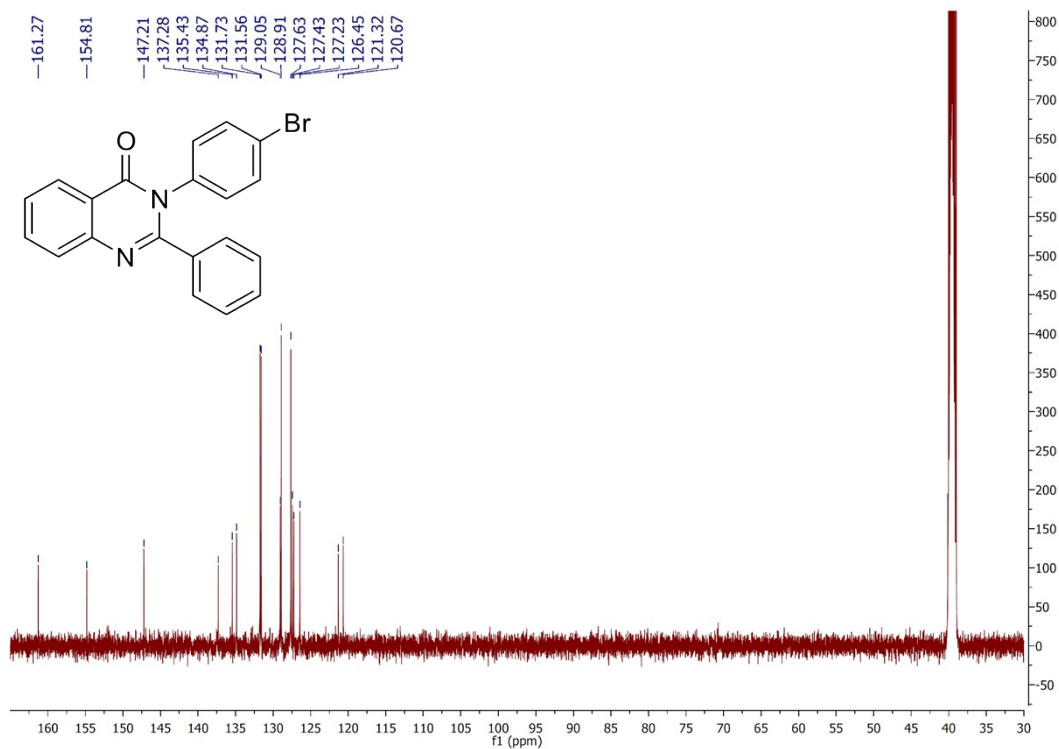

### 3-Butyl-2-phenylquinazolin-4(3H)-one (3ap)

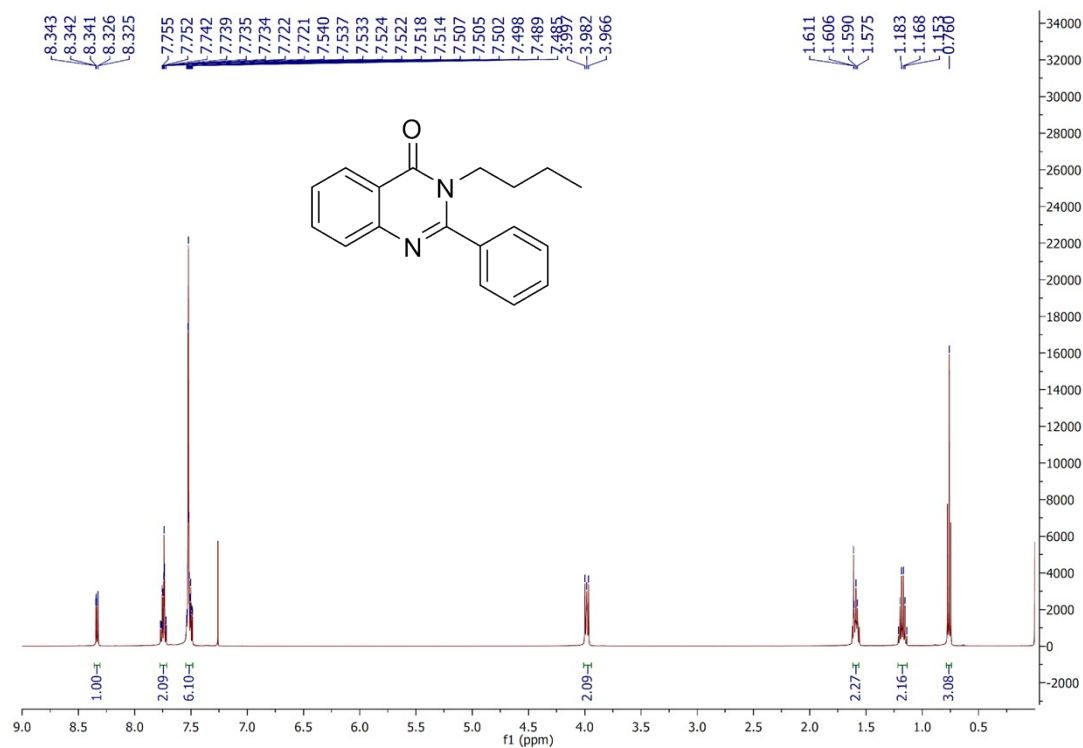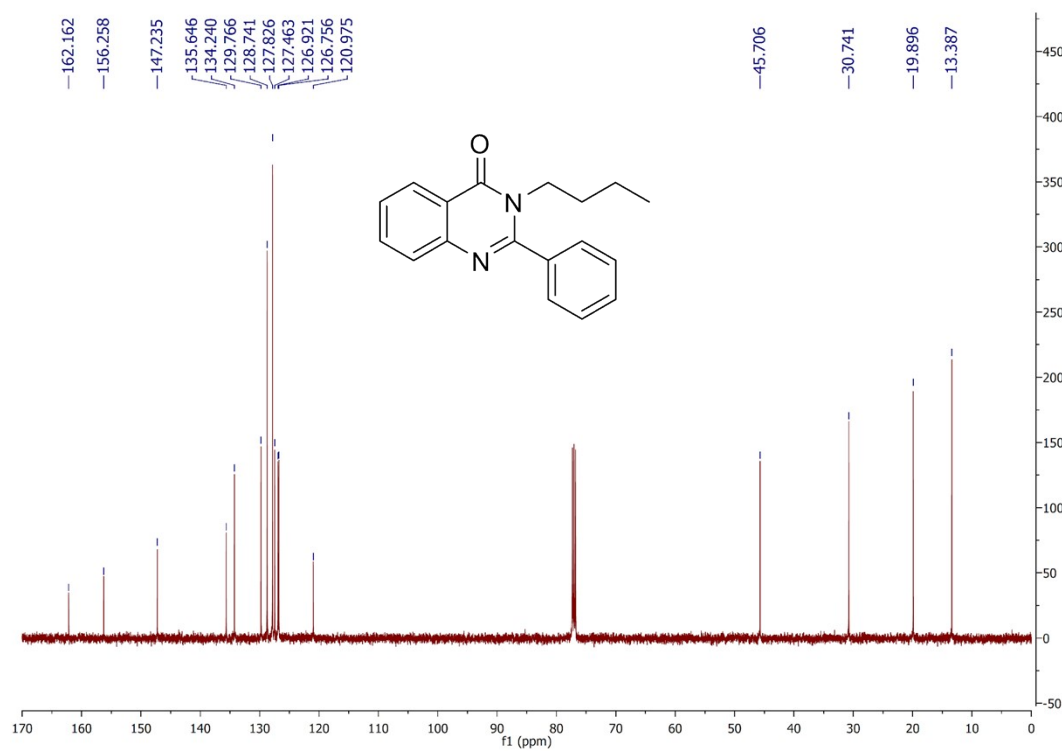

### 3-(2-Hydroxyethyl)-2-phenylquinazolin-4(3H)-one (3aq)

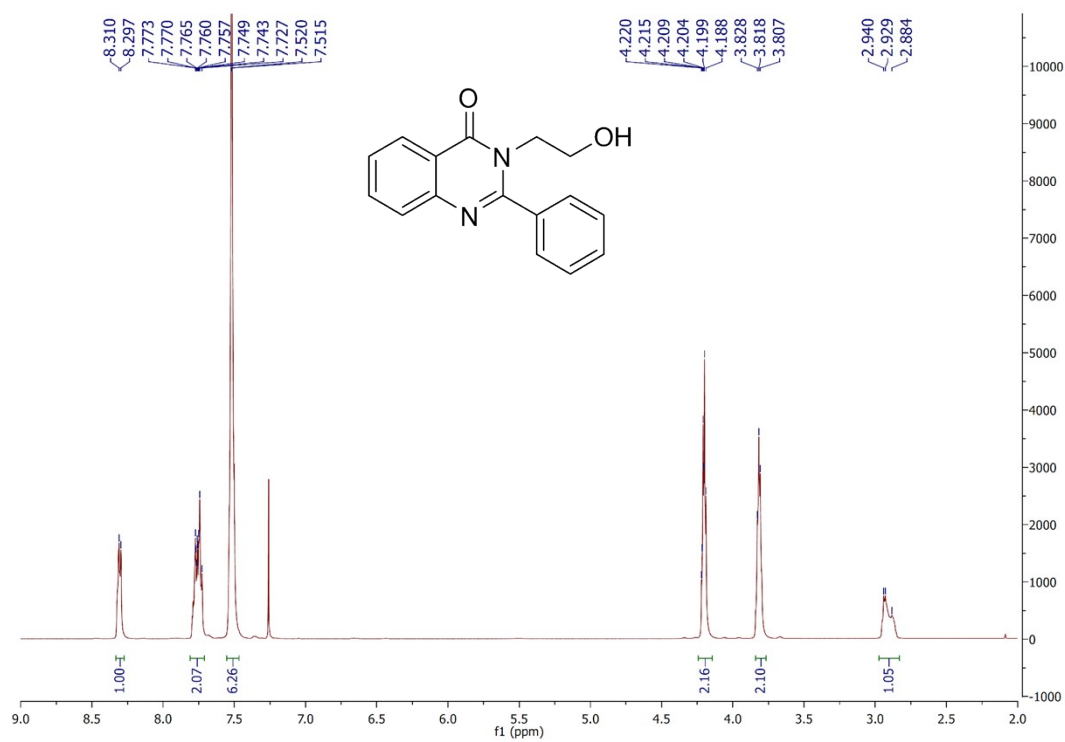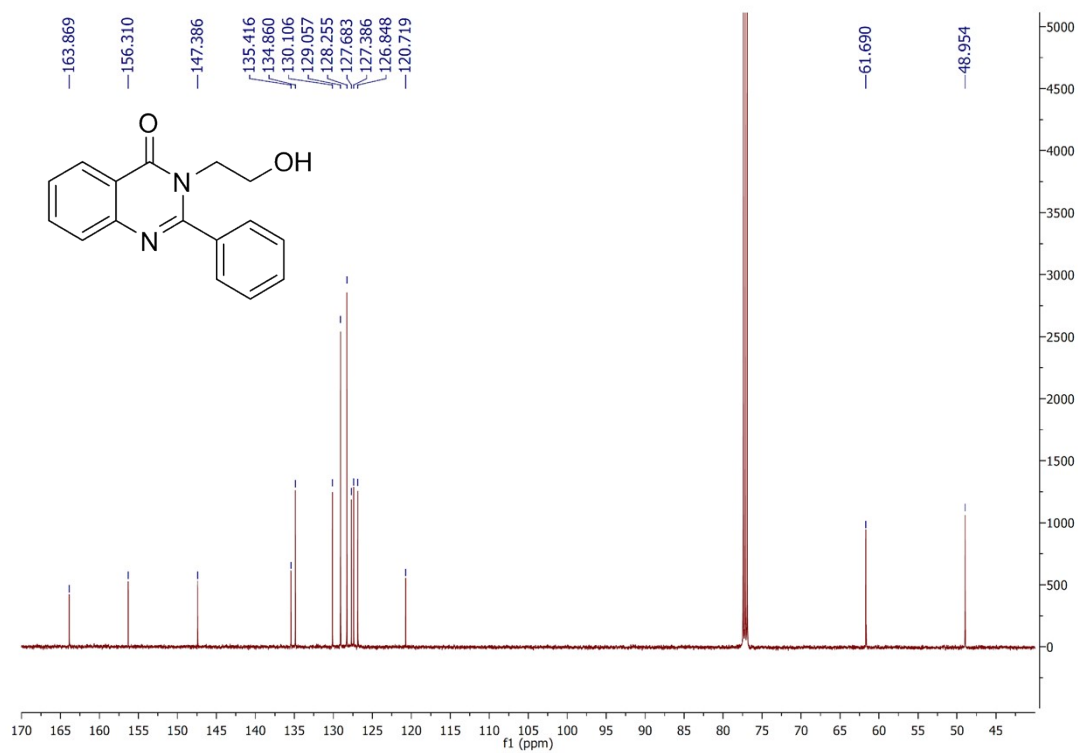

**3-(4-Chlorobenzyl)- 2-methylquinazolin-4(3*H*)-one (3wg)**

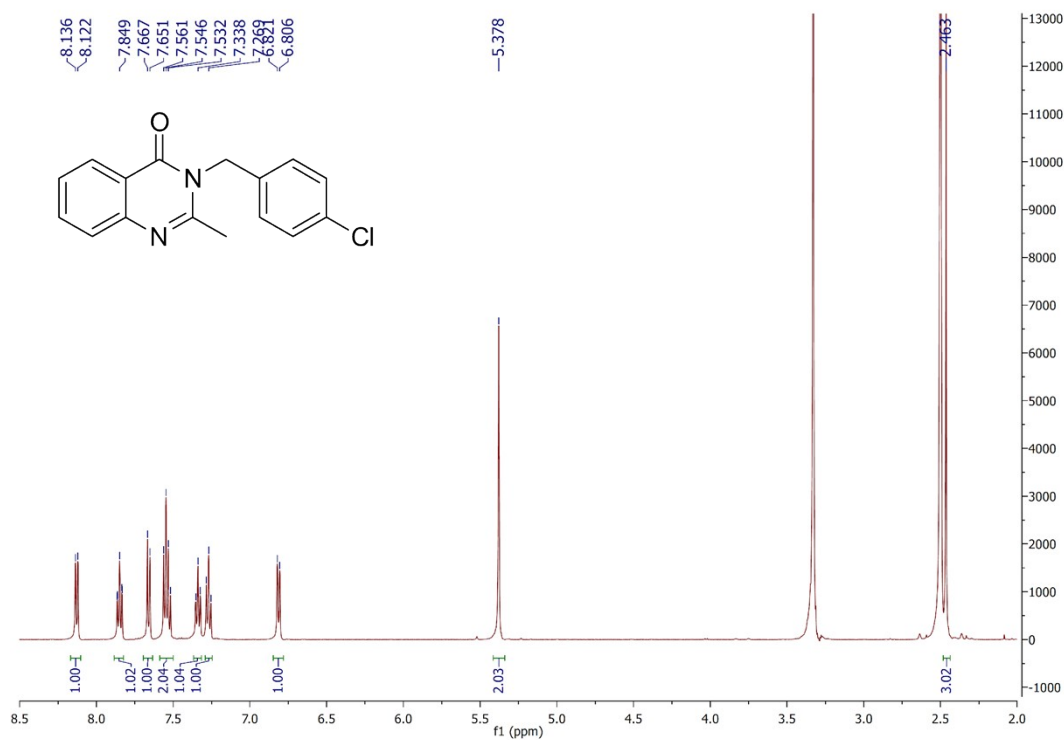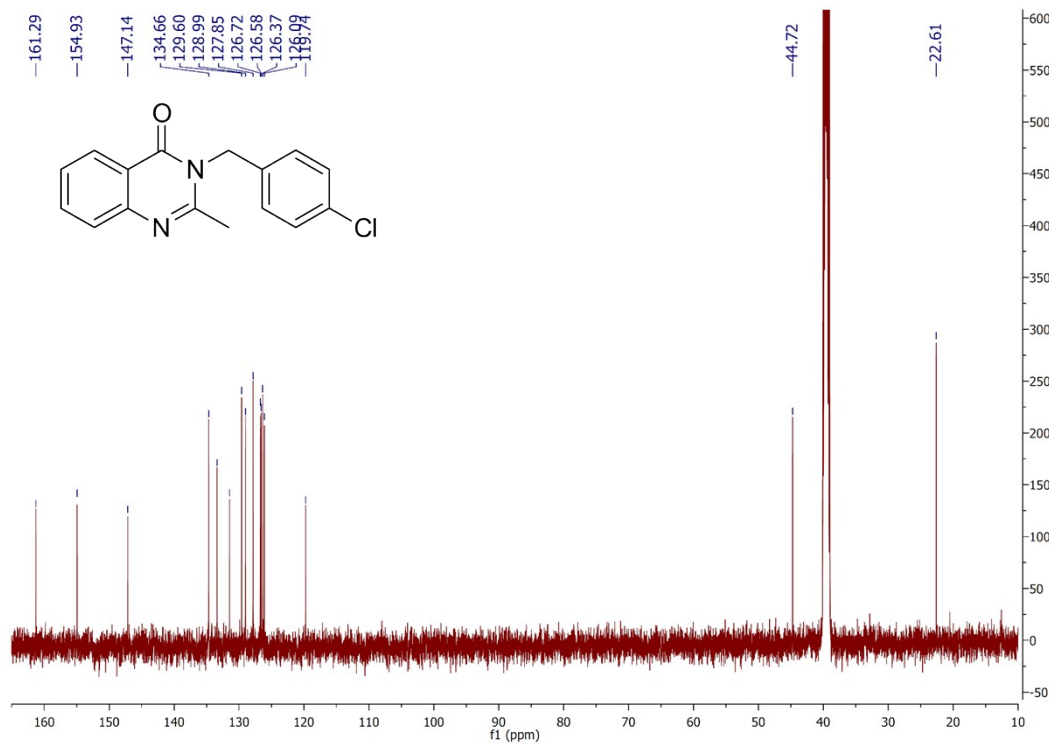

## 2-Methyl-3-(3-methoxybenzyl)quinazolin-4(3H)-one (3wd)

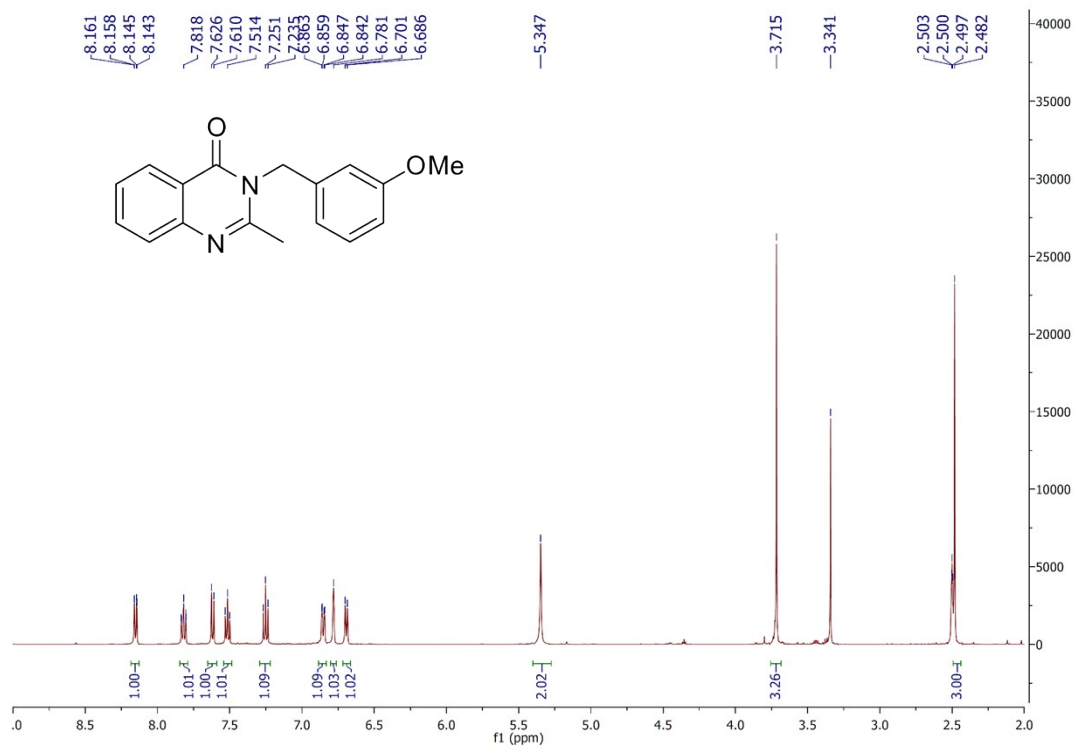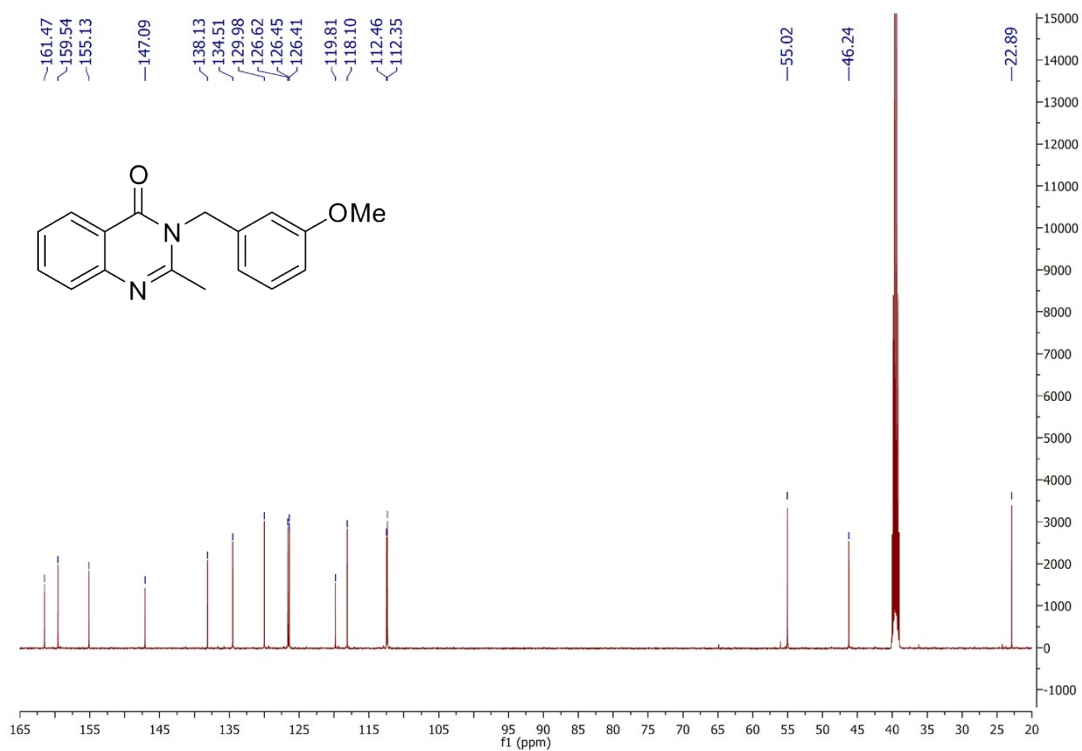

## 2-Methyl-3-(4-methoxybenzyl)quinazolin-4(3H)-one (3we)

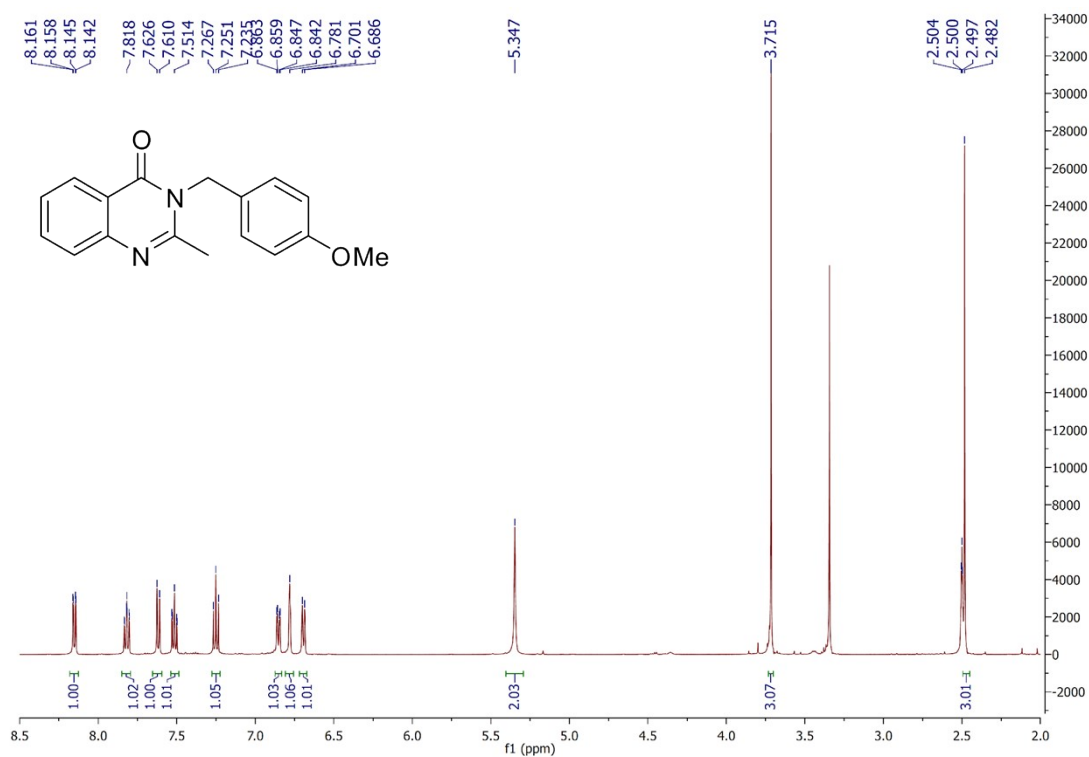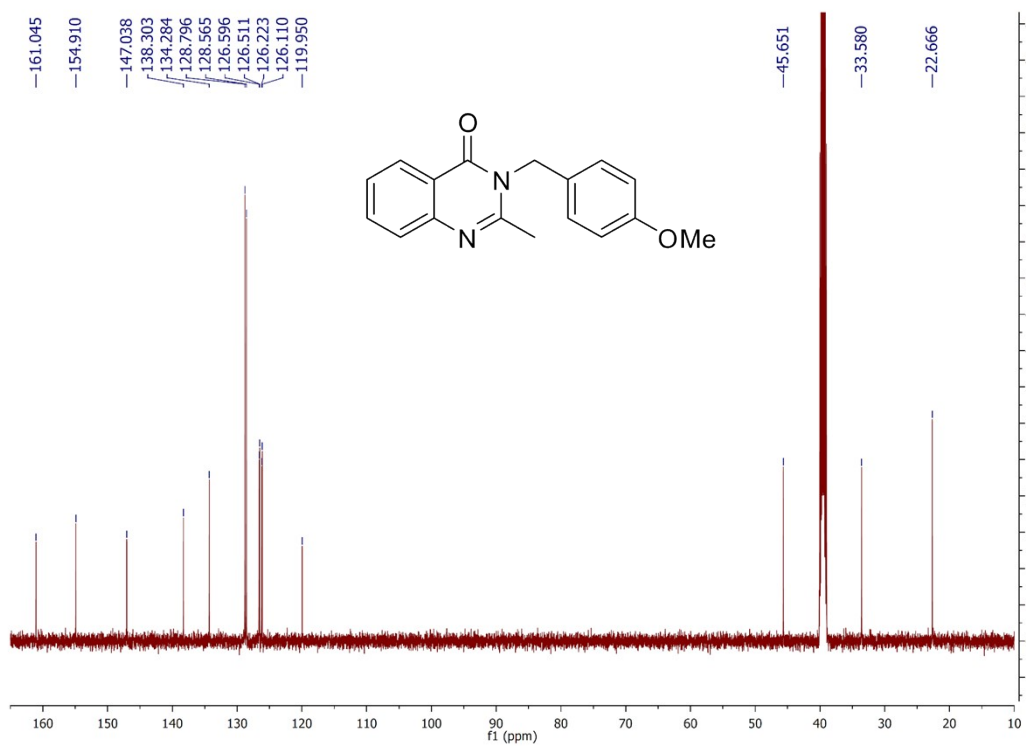

# Indolo[2,1-*b*]quinazoline-6,12-dione (4aa)

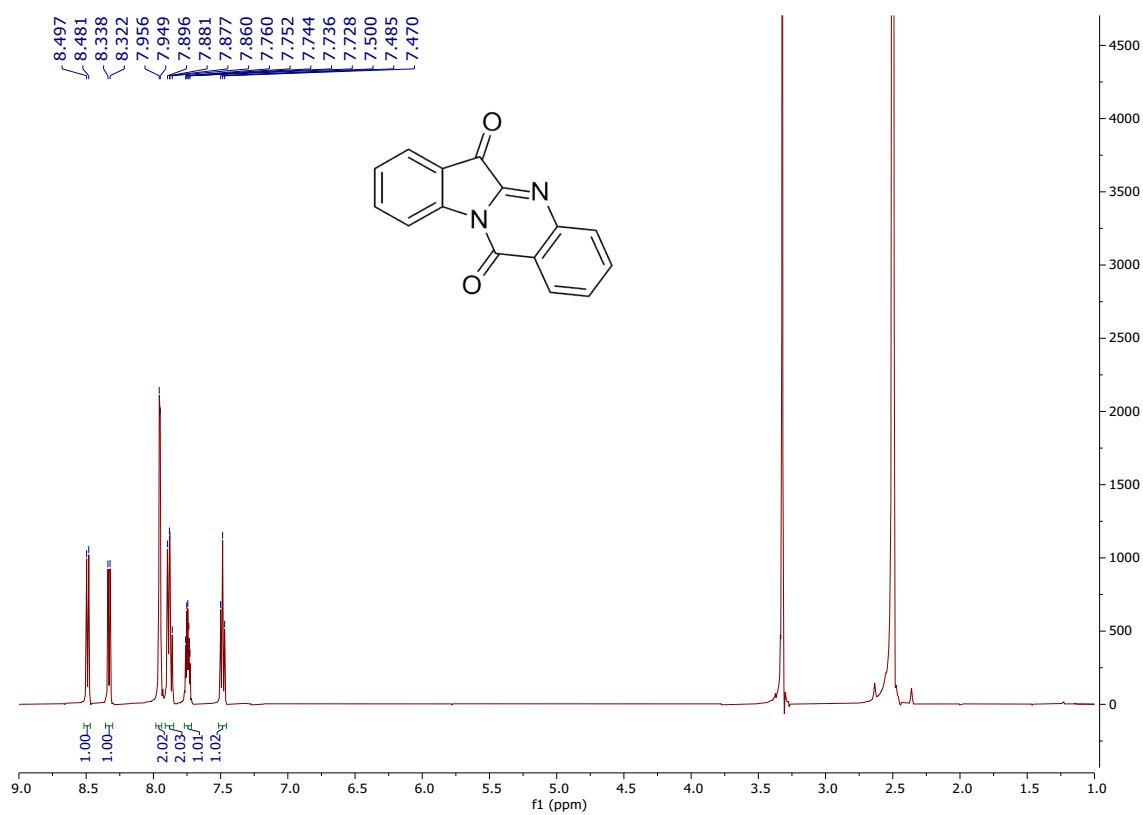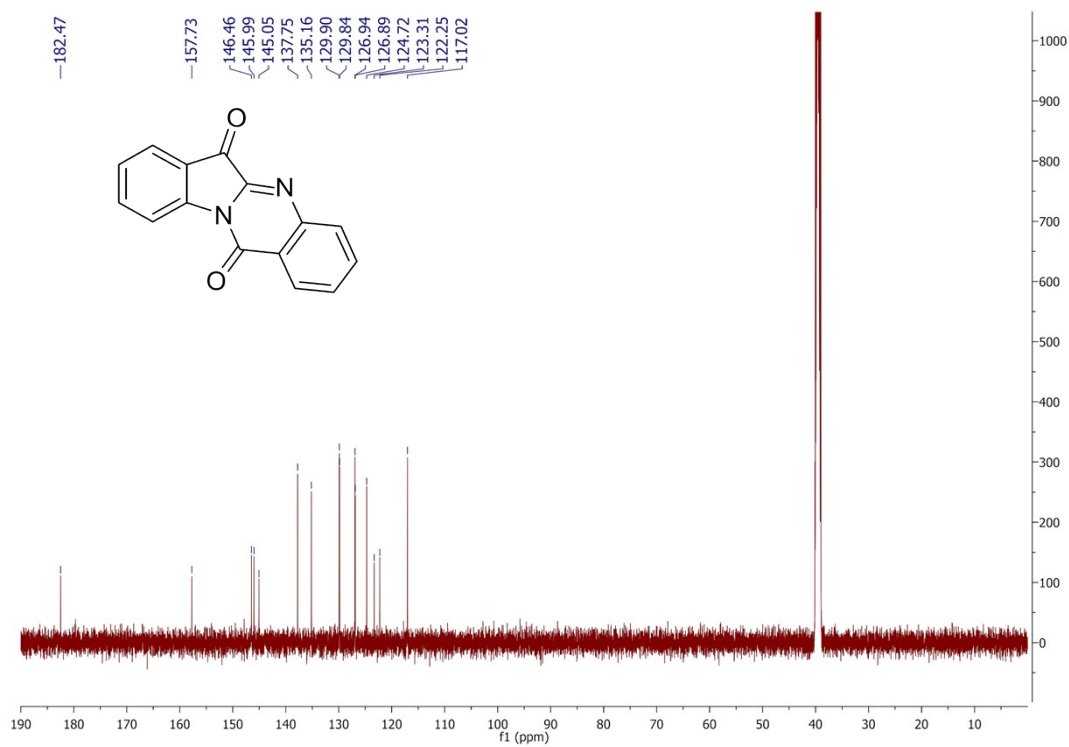



## 2,8-Dimethylindolo[2,1-*b*]quinazoline-6,12-dione (4bb)

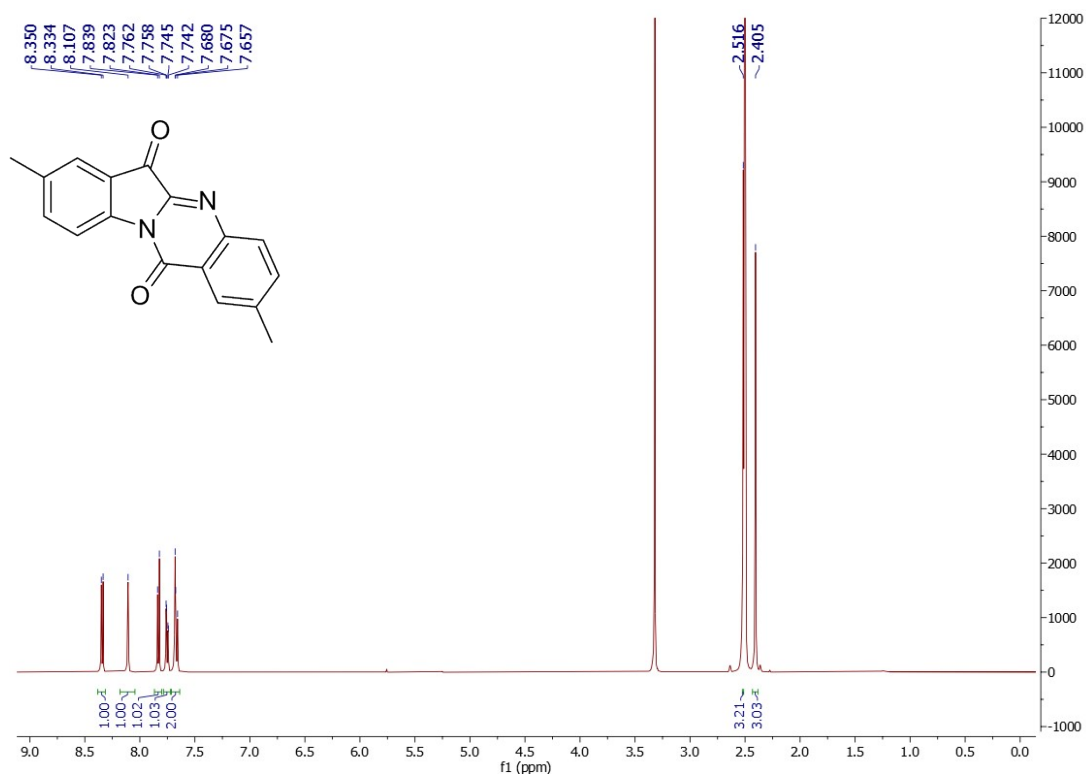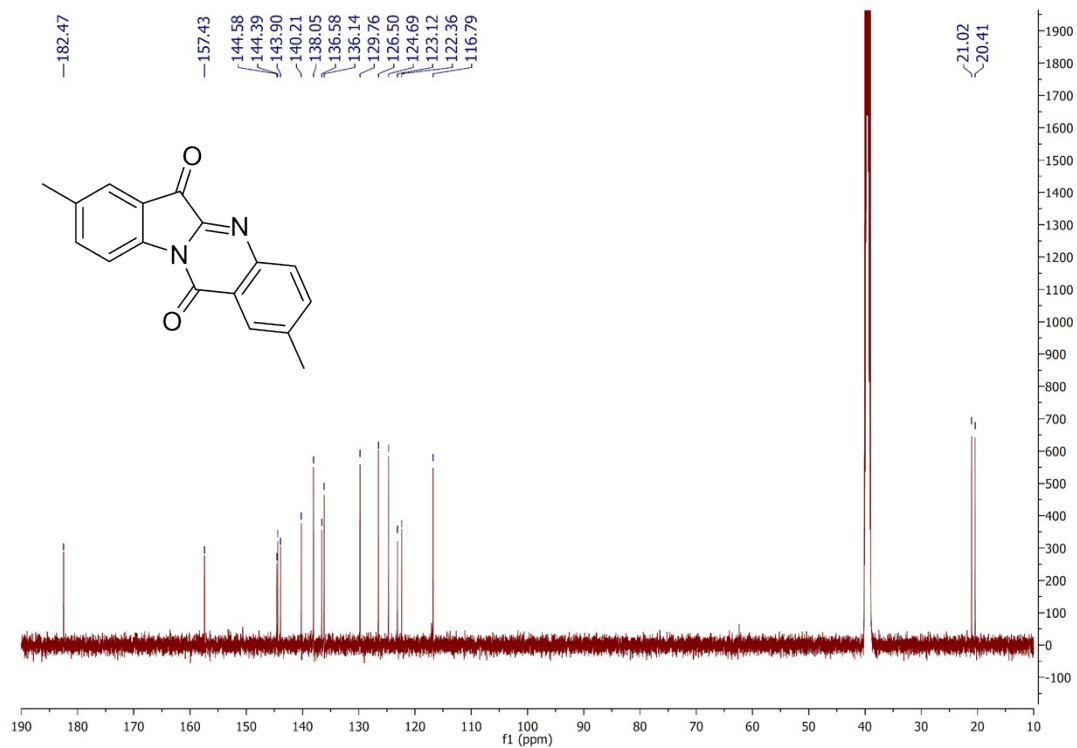

## 2,8-Difluoroindolo[2,1-b]quinazoline-6,12-dione (4cc)

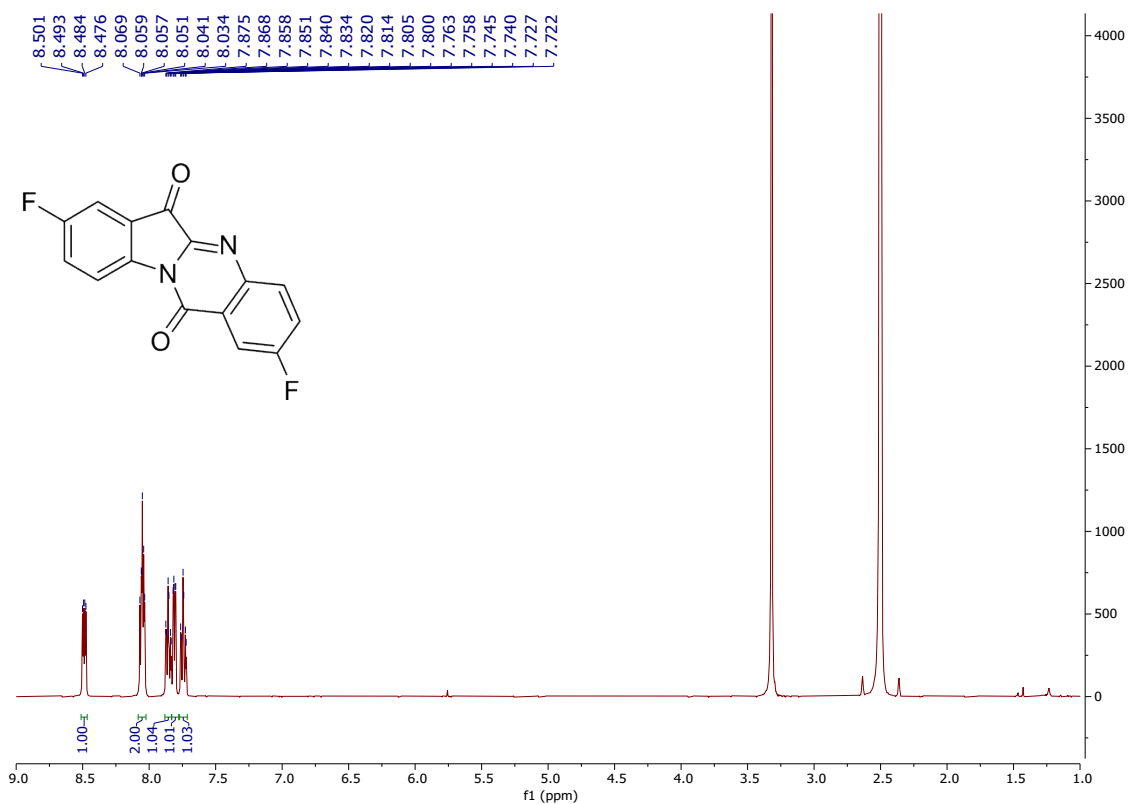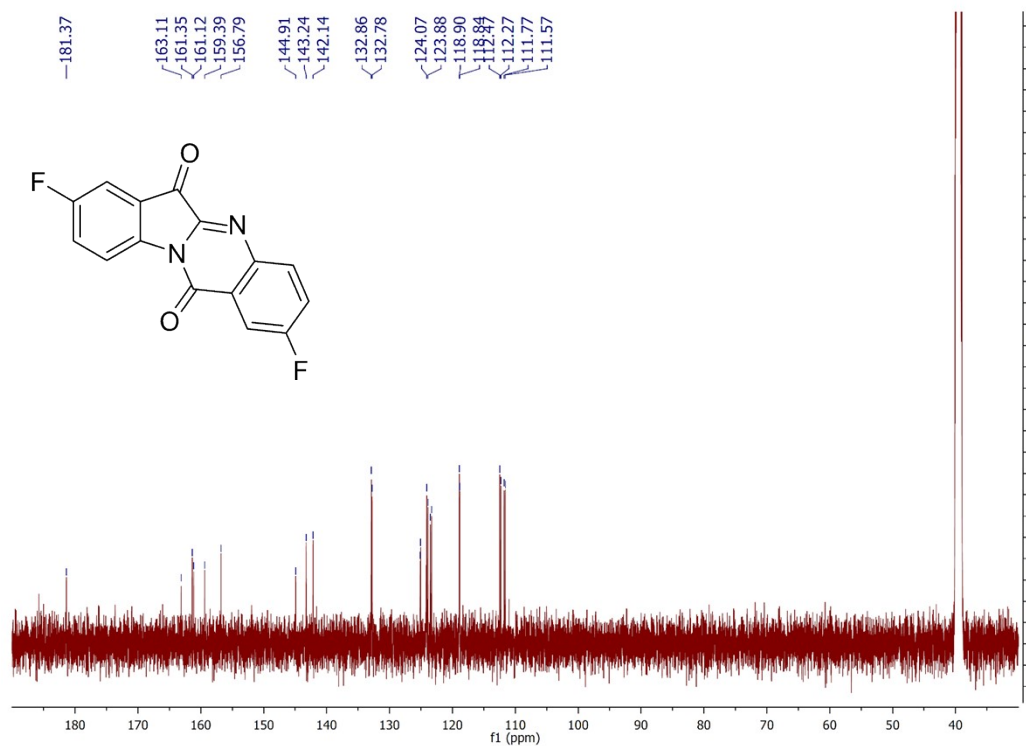

**2,8-Dibromoindolo[2,1-*b*]quinazoline-6,12-dione (4ee)**

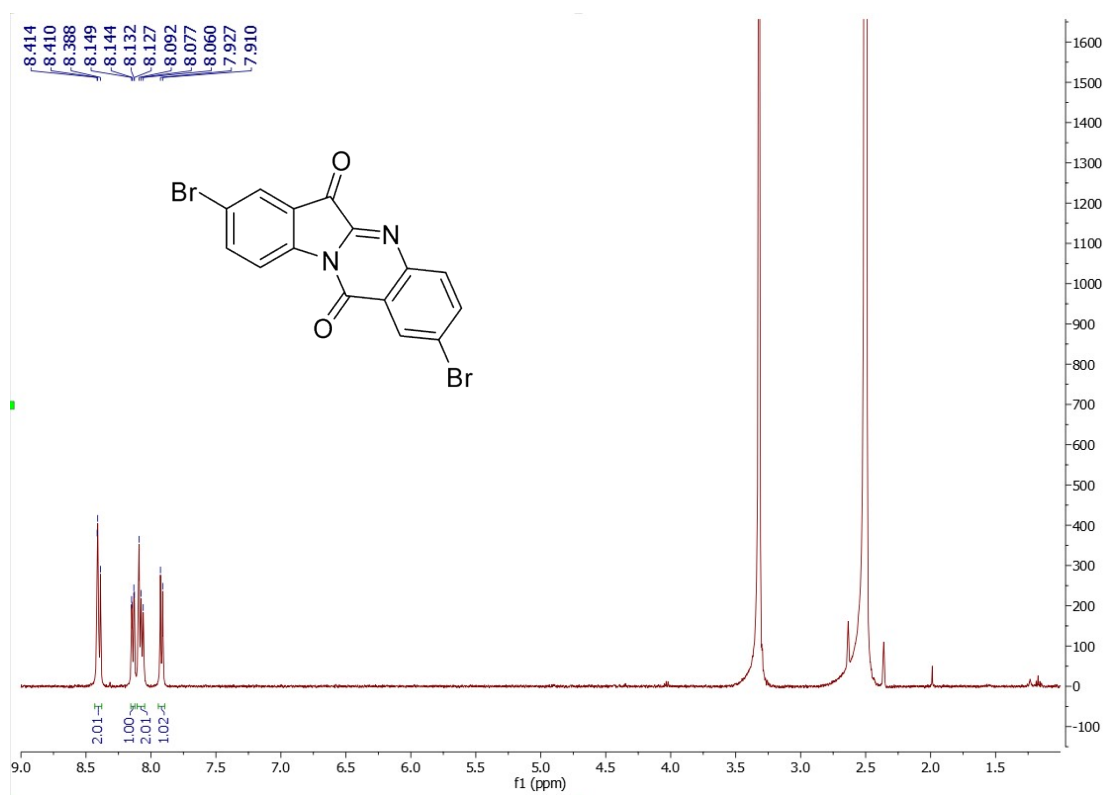

**Dimethyl 6,12-dioxo-6,12-dihydroindolo[2,1-*b*]quinazoline-2,8-dicarboxylate (4ff)**

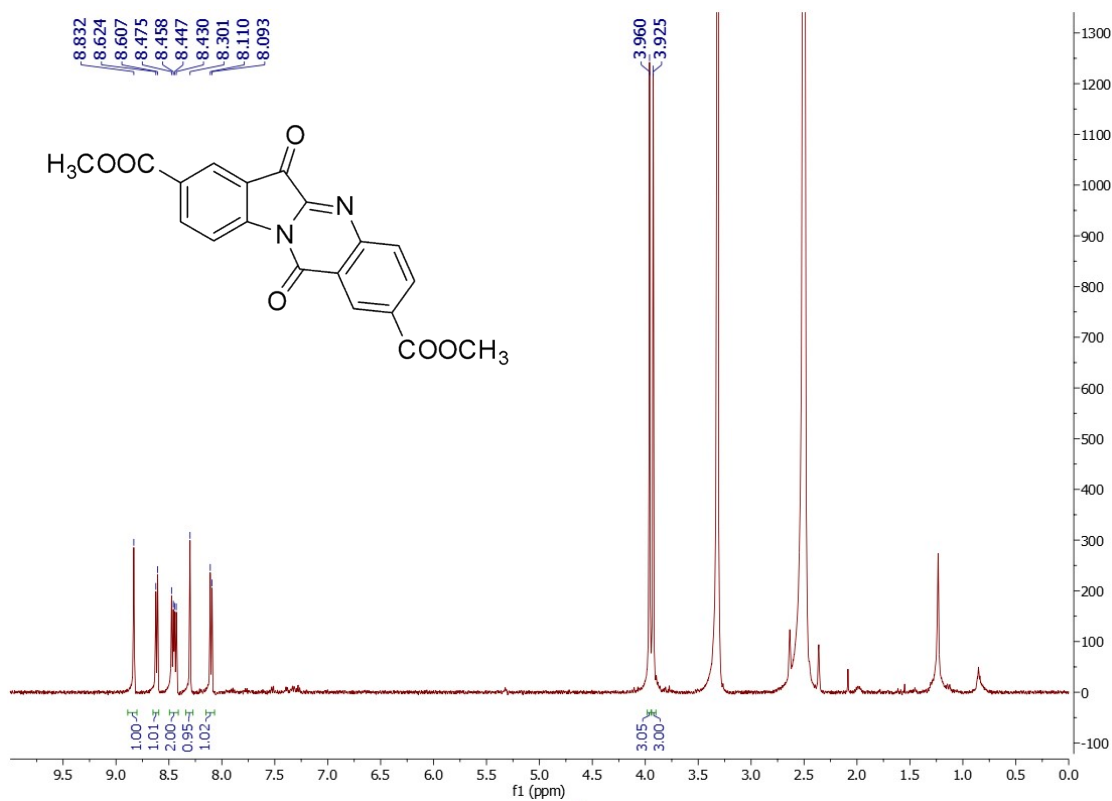

Supplement: d4ra01807a1.pdf [file d4ra01807a1.pdf]
